# Supplementary material for: Dynamical electron correlation and the chemical bond. III. Covalent bonds in the A2 molecules (A = C–F)
Source: Royal Society of Chemistry journal article supplement (doi:10.1039/d4cp01695e), 2024-01-01
Supplement: d4cp01695e1.pdf [file d4cp01695e1.pdf]

## Dynamical Electron Correlation and the Chemical Bond. III. Covalent Bonds in the $A_2$ Molecules ( $A = C-F$ )

Thom H. Dunning, Jr.<sup>1</sup> and Lu T. Xu<sup>a</sup>

Department of Chemistry, University of Washington, Seattle, Washington 98195

**ABSTRACT.** For most molecules the Spin-Coupled Generalized Valence Bond (SCGVB) wavefunction accounts for the effects of non-dynamical electron correlation. The remaining errors in the prediction of molecular properties and the outcomes of molecular processes are then solely due to dynamical electron correlation. In this article we extend our previous studies of the effects of dynamical electron correlation on the potential energy curves and spectroscopic constants of the AH and AF ( $A = B-F$ ) molecules to the homonuclear diatomic molecules,  $A_2$  ( $A = C-F$ ). At large  $R$  the magnitude of  $\Delta E_{DEC}(R)$ , the correlation energy of the molecule relative to that in the atoms, increases nearly exponentially with decreasing  $R$ , just as we found in the AH and AF molecules. But, as  $R$  continues to decrease the rate of increase in the magnitude of  $\Delta E_{DEC}(R)$  slows, eventually leading to a minimum for  $C_2-O_2$ . Examination of the SCGVB wavefunction for the  $N_2$  molecule around the minimum in  $\Delta E_{DEC}(R)$  did not reveal a clear cause for this puzzling behavior. As before, the changes in  $\Delta E_{DEC}(R)$  around  $R_e$  were found to have an uneven effect on the spectroscopic constants of the  $A_2$  molecules.

---

<sup>1</sup> Department of Chemistry, University of Washington, Seattle, Washington 98195 USA

|                       | <b>C2</b>  |            |            |             |            |         |
|-----------------------|------------|------------|------------|-------------|------------|---------|
|                       | SCGVB      | vCAS(1)    | VCASCI(1)  | vCASCI(1)+Q | CCSD(T)    | Expt'l  |
| <b>Ee(hartrees)</b>   | -75.594679 | -75.629859 | -75.794748 | -75.804474  | -75.802143 |         |
| <b>E[Re(vcasci3)]</b> | -75.594662 | -75.629760 | -75.794748 | -75.804458  |            |         |
| <b>Re(Å)</b>          | 1.244      | 1.256      | 1.248      | 1.248       | 1.246      | 1.2425  |
| <b>ωe(cm-1)</b>       | 1842.6     | 1816.8     | 1841.2     | 1837.4      | 1854.0     | 1854.71 |
| <b>ωexe(cm-1)</b>     | 14.54      | 12.53      | 13.53      | 13.80       | 13.19      | 13.34   |
| <b>De(kcal/mol)</b>   | 112.6      | 137.2      | 144.1      | 143.5       | 143.6      | 145.2   |
| <b>D0(kca/mol)</b>    | 110.0      | 134.6      | 141.5      | 140.9       | 141.0      |         |

|  | <b>N2</b>   |             |             |             |             |         |
|--|-------------|-------------|-------------|-------------|-------------|---------|
|  | SCGVB       | vCAS3       | VCASCI3     | vCASCI3+Q   | CCSD(T)     | Expt'l  |
|  | -109.073564 | -109.139923 | -109.392392 | -109.407111 | -109.407243 |         |
|  | -109.073489 | -109.139901 | -109.392392 | -109.407110 |             |         |
|  | 1.096       | 1.104       | 1.101       | 1.101       | 1.100       | 1.09768 |
|  | 2369.4      | 2338.6      | 2350.1      | 2342.4      | 2354.1      | 2358.57 |
|  | 15.63       | 13.27       | 13.65       | 13.73       | 13.41       | 14.324  |
|  | 171.4       | 213.0       | 225.1       | 224.1       | 224.1       | 228.4   |
|  | 168.0       | 209.7       | 221.7       | 220.7       | 220.7       |         |

|                       | <b>O2</b>   |             |             |             |             |         |
|-----------------------|-------------|-------------|-------------|-------------|-------------|---------|
|                       | SCGVB(2csf) | vCAS3       | VCASCI3     | vCASCI3+Q   | CCSD(T)     | Expt'l  |
| <b>Ee(hartrees)</b>   | -149.729913 | -149.769375 | -150.147042 | -150.175050 | -150.177985 |         |
| <b>E[Re(vcasci3)]</b> | -149.729827 | -149.769302 | -150.147042 | -150.175042 |             |         |
| <b>Re(Å)</b>          | 1.200       | 1.215       | 1.208       | 1.211       | 1.208       | 1.20752 |
| <b>ωe(cm-1)</b>       | 1579.3      | 1547.6      | 1584.0      | 1573.2      | 1600.5      | 1580.19 |
| <b>ωexe(cm-1)</b>     | 26.90       | 11.67       | 10.99       | 10.94       | 17.01       | 11.98   |
| <b>De(kcal/mol)</b>   | 68.6        | 95.0        | 116.4       | 118.3       | 118.0       | 120.2   |
| <b>D0(kca/mol)</b>    | 66.3        | 92.8        | 114.2       | 116.1       | 115.8       |         |

|  | <b>F2</b>   |             |             |             |             |         |
|--|-------------|-------------|-------------|-------------|-------------|---------|
|  | SCGVB       | vCAS3       | VCASCI3     | vCASCI3+Q   | CCSD(T)     | Expt'l  |
|  | -198.844910 | -198.848866 | -199.324611 | -199.358788 | -199.365736 |         |
|  | -198.843909 | -198.848110 | -199.324611 | -199.358788 |             |         |
|  | 1.467       | 1.459       | 1.415       | 1.414       | 1.413       | 1.41193 |
|  | 698.8       | 733.4       | 895.9       | 911.8       | 921.4       | 916.64  |
|  | 19.82       | 19.83       | 13.05       | 12.45       | 12.25       | 11.236  |
|  | 16.6        | 19.1        | 34.8        | 37.2        | 37.8        | 38.3    |
|  | 15.6        | 18.1        | 33.5        | 35.9        | 36.5        |         |

#### Changes in Spectroscopic Constants Due to DEC

|                      | <b>C2</b> | <b>N2</b> | <b>O2</b> | <b>F2</b> |
|----------------------|-----------|-----------|-----------|-----------|
| <b>ΔEe(H)</b>        | -0.200069 | -0.318828 | -0.417129 | -0.479701 |
| <b>ΔE(kcal/mol)</b>  | -125.5452 | -200.0676 | -261.7525 | -301.0170 |
| <b>ΔRe(Å)</b>        | 0.003     | 0.005     | 0.008     | -0.053    |
| <b>Δωe(cm-1)</b>     | -1.4      | -19.3     | 4.6       | 197.1     |
| <b>ΔDE(kcal/mol)</b> | 31.5      | 53.7      | 47.9      | 18.1      |

C2: RHF, CCSD(T), SCGVB, vCAS and vCASI ENERGIES

| R(Å)  | E(R=∞)       |          | R(R=∞)       |             | E(R=20.00)   |           | F(R=20.00)   |           | E(R=20.00)   |            | E(R=20.00)   |          | E(R=20.00)   |  |
|-------|--------------|----------|--------------|-------------|--------------|-----------|--------------|-----------|--------------|------------|--------------|----------|--------------|--|
|       | -75.376646   |          | -75.573271   |             | -75.41520527 |           | -75.41122250 |           | -75.56511440 |            | -75.41122246 |          | -75.56511436 |  |
|       | E(RHF)       | ΔE(RHF)  | E[CCSD(T)]   | ΔE[CCSD(T)] | SCGVB        | ΔE(SCGVB) | vCAS(3State) | ΔE1(vCAS) | E1(vCASI)    | ΔE1(vCASI) | ΔE2(vCAS)    | E2(vCAS) | ΔE2(vCASI)   |  |
| 0.918 |              |          |              |             | -75.28202758 | 83.5703   | -75.30350129 | 67.5961   | -75.47930335 | 53.8473    | -75.10873462 | 189.8140 | -75.29758730 |  |
| 0.928 |              |          |              |             | -75.30799699 | 67.2742   | -75.32986582 | 51.0521   | -75.50522110 | 37.5836    | -75.13644556 | 172.4251 | -75.32446959 |  |
| 0.938 |              |          |              |             | -75.33230968 | 52.0178   | -75.35457646 | 35.5459   | -75.52950010 | 22.3483    | -75.16264244 | 155.9863 | -75.34985328 |  |
| 0.948 |              |          |              |             | -75.35504949 | 37.7483   | -75.37771696 | 21.0250   | -75.55222321 | 8.0893     | -75.18741678 | 140.4402 | -75.37383306 |  |
| 0.958 |              |          |              |             | -75.37629627 | 24.4158   | -75.39936717 | 7.4393    | -75.57346926 | -5.2428    | -75.21085510 | 125.7324 | -75.39649874 |  |
| 0.968 |              |          |              |             | -75.39612608 | 11.9724   | -75.41960326 | -5.2590   | -75.59331334 | -17.6951   | -75.23303867 | 111.8120 | -75.41793479 |  |
| 0.978 |              |          |              |             | -75.41461137 | 0.3727    | -75.43849782 | -17.1155  | -75.61182688 | -29.3125   | -75.25404322 | 98.6315  | -75.43821986 |  |
| 0.988 |              |          |              |             | -75.43182109 | -10.4266  | -75.45612004 | -28.1736  | -75.62907786 | -40.1377   | -75.27393868 | 86.1469  | -75.45742636 |  |
| 0.998 |              |          |              |             | -75.44782092 | -20.4666  | -75.47253578 | -38.4747  | -75.64513096 | -50.2112   | -75.29278910 | 74.3181  | -75.47562012 |  |
| 1.008 |              |          |              |             | -75.46267338 | -29.7867  | -75.48780775 | -48.0580  | -75.66004773 | -59.5716   | -75.31065267 | 63.1085  | -75.49286032 |  |
| 1.018 |              |          |              |             | -75.47643797 | -38.4241  | -75.50199556 | -56.9610  | -75.67388674 | -68.2557   | -75.32758185 | 52.4853  | -75.50919962 |  |
| 1.028 |              |          |              |             | -75.48917136 | -46.4144  | -75.51515589 | -65.2192  | -75.68670369 | -76.2984   | -75.34362374 | 42.4188  | -75.52468449 |  |
| 1.038 |              |          |              |             | -75.50092747 | -53.7915  | -75.52734254 | -72.8664  | -75.69855164 | -83.7331   | -75.35882055 | 32.8827  | -75.53935585 |  |
| 1.048 |              |          |              |             | -75.51175766 | -60.5876  | -75.53860662 | -79.9348  | -75.70948100 | -90.5914   | -75.37321019 | 23.8531  | -75.55324980 |  |
| 1.058 |              |          |              |             | -75.52171079 | -66.8332  | -75.54899663 | -86.4546  | -75.71953980 | -96.9034   | -75.38682692 | 15.3084  | -75.56639847 |  |
| 1.068 |              |          |              |             | -75.53083340 | -72.5578  | -75.55855858 | -92.4548  | -75.72877374 | -102.6978  | -75.39970201 | 7.2292   | -75.57883087 |  |
| 1.088 |              |          |              |             | -75.54676215 | -82.5532  | -75.57537083 | -103.0047 | -75.74493884 | -112.8416  | -75.42334113 | -7.6046  | -75.60165156 |  |
| 1.108 |              |          |              |             | -75.55987343 | -90.7807  | -75.58936678 | -111.7872 | -75.75829957 | -121.2255  | -75.44433968 | -20.7814 | -75.62237921 |  |
| 1.128 |              |          |              |             | -75.57046602 | -97.4276  | -75.60083800 | -118.9855 | -75.76914875 | -128.0335  | -75.46289275 | -32.4236 | -75.64293211 |  |
| 1.148 |              |          |              |             | -75.57881080 | -102.6640 | -75.61004771 | -124.7647 | -75.77751688 | -133.4319  | -75.47918530 | -42.6473 | -75.66076770 |  |
| 1.168 | -75.39723320 | -12.9185 | -75.79211068 | -137.3239   | -75.58515348 | -106.6441 | -75.61723389 | -129.2741 | -75.78434880 | -137.5717  | -75.49339484 | -51.5640 | -75.67615545 |  |
| 1.188 | -75.40158833 | -15.6513 | -75.79682935 | -140.2849   | -75.58971692 | -109.5077 | -75.62261195 | -132.6489 | -75.78915814 | -140.5896  | -75.50569172 | -59.2804 | -75.68933935 |  |
| 1.208 | -75.40433666 | -17.3759 | -75.79995728 | -142.2477   | -75.59270329 | -111.3817 | -75.62637712 | -135.0116 | -75.79237748 | -142.6098  | -75.51730082 | -66.5652 | -75.70054032 |  |
| 1.228 | -75.40563958 | -18.2061 | -75.80167318 | -143.3245   | -75.59429604 | -112.3812 | -75.62870648 | -136.4733 | -75.79418635 | -143.7448  | -75.52736968 | -72.8835 | -75.70995849 |  |
| 1.248 | -75.40572159 | -18.2450 | -75.80213907 | -143.6168   | -75.59466160 | -112.6106 | -75.62976072 | -137.1348 | -75.79474780 | -144.0972  | -75.53580678 | -78.1779 | -75.71777514 |  |
| 1.268 | -75.40467185 | -17.5863 | -75.80149586 | -143.2132   | -75.59395097 | -112.1646 | -75.62968577 | -137.0878 | -75.79421004 | -143.7597  | -75.54277910 | -82.5531 | -75.72415458 |  |
| 1.288 | -75.40264544 | -16.3147 | -75.79989620 | -142.2094   | -75.59230113 | -111.1294 | -75.62861420 | -136.4154 | -75.79270793 | -142.8171  | -75.54843776 | -86.1039 | -75.72924571 |  |
| 1.308 | -75.39976466 | -14.5070 | -75.79744121 | -140.6689   | -75.58983630 | -109.5826 | -75.62666645 | -135.1931 | -75.79036425 | -141.3464  | -75.55291958 | -88.9163 | -75.73318355 |  |
| 1.328 | -75.39614006 | -12.2325 | -75.79424230 | -138.6615   | -75.58666910 | -107.5952 | -75.62395204 | -133.4898 | -75.78729097 | -139.4179  | -75.55634848 | -91.0680 | -75.73609051 |  |
| 1.348 |              |          |              |             | -75.58290157 | -105.2310 | -75.62057059 | -131.3679 | -75.78359044 | -137.0958  | -75.55883673 | -92.6294 | -75.73807757 |  |
| 1.368 |              |          |              |             | -75.57862610 | -102.5481 | -75.61661276 | -128.8844 | -75.77935640 | -134.4389  | -75.56048604 | -93.6643 | -75.73924539 |  |
| 1.388 |              |          |              |             | -75.57392628 | -99.5990  | -75.61216113 | -126.0909 | -75.77467509 | -131.5013  | -75.56138863 | -94.2307 | -75.73968522 |  |
| 1.408 |              |          |              |             | -75.56887763 | -96.4309  | -75.60729106 | -123.0349 | -75.76962629 | -128.3332  | -75.56162803 | -94.3809 | -75.73947979 |  |
| 1.428 |              |          |              |             | -75.56354834 | -93.0867  | -75.60207143 | -119.7595 | -75.76428438 | -124.9811  | -75.56127998 | -94.1625 | -75.73870406 |  |
| 1.448 |              |          |              |             | -75.55799987 | -89.6050  | -75.59656539 | -116.3044 | -75.75871941 | -121.4890  | -75.56041308 | -93.6185 | -75.73742594 |  |
| 1.468 |              |          |              |             | -75.55228750 | -86.0204  | -75.59083116 | -112.7062 | -75.75299833 | -117.8990  | -75.55908948 | -92.7880 | -75.73570695 |  |
| 1.488 |              |          |              |             | -75.54646089 | -82.3642  | -75.58492279 | -108.9986 | -75.74718606 | -114.2517  | -75.55736549 | -91.7062 | -75.73360273 |  |
| 1.508 |              |          |              |             | -75.54056456 | -78.6642  | -75.57889102 | -105.2136 | -75.74134649 | -110.5873  | -75.55529203 | -90.4050 | -75.73116361 |  |
| 1.528 |              |          |              |             | -75.53463828 | -74.9454  | -75.57278426 | -101.3816 | -75.73554263 | -106.9454  | -75.55291521 | -88.9136 | -75.72843507 |  |
| 1.548 |              |          |              |             | -75.52871753 | -71.2300  | -75.56664982 | -97.5321  | -75.72983539 | -103.3640  | -75.55027670 | -87.2579 | -75.72545816 |  |
| 1.568 |              |          |              |             | -75.52283382 | -67.5379  | -75.56053524 | -93.6952  | -75.72427981 | -99.8778   | -75.54741416 | -85.4616 | -75.72226991 |  |
| 1.588 |              |          |              |             | -75.51701507 | -63.8866  | -75.55448993 | -89.9017  | -75.71891872 | -96.5137   | -75.54436157 | -83.5461 | -75.71890367 |  |
| 1.608 |              |          |              |             | -75.51128587 | -60.2915  | -75.54856636 | -86.1846  | -75.71538946 | -94.2990   | -75.54114961 | -81.5305 | -75.71377553 |  |
| 1.628 |              |          |              |             | -75.50566780 | -56.7661  | -75.54281986 | -82.5786  | -75.71175421 | -92.0179   | -75.53780592 | -79.4323 | -75.70885105 |  |
| 1.648 |              |          |              |             | -75.50017965 | -53.3222  | -75.53730438 | -79.1176  | -75.70802214 | -89.6760   | -75.53435538 | -77.2671 | -75.70412694 |  |
| 1.668 |              |          |              |             | -75.49483768 | -49.9701  | -75.53206231 | -75.8281  | -75.70421493 | -87.2869   | -75.53082038 | -75.0488 | -75.69957448 |  |
| 1.688 |              |          |              |             | -75.48965579 | -46.7184  | -75.52722106 | -72.7902  | -75.70035199 | -84.8629   | -75.52711101 | -72.7212 | -75.69516351 |  |
| 1.708 |              |          |              |             | -75.48464570 | -43.5745  | -75.52357547 | -70.5026  | -75.69645066 | -82.4148   | -75.52243617 | -69.7877 | -75.69086816 |  |
| 1.728 |              |          |              |             | -75.47981712 | -40.5446  | -75.51989984 | -68.1961  | -75.69252643 | -79.9523   | -75.51799975 | -67.0038 | -75.68666895 |  |
| 1.748 |              |          |              |             | -75.47517787 | -37.6334  | -75.51620870 | -65.8798  | -75.68859308 | -77.4841   | -75.51375641 | -64.3410 | -75.68255252 |  |
| 1.768 |              |          |              |             | -75.47073402 | -34.8448  | -75.51251507 | -63.5621  | -75.68466290 | -75.0178   | -75.50966626 | -61.7744 | -75.67851055 |  |
| 1.788 |              |          |              |             | -75.46648997 | -32.1816  | -75.50883062 | -61.2500  | -75.68074682 | -72.5605   | -75.50569971 | -59.2854 | -75.67453840 |  |
| 1.808 |              |          |              |             | -75.46244857 | -29.6456  | -75.50516578 | -58.9503  | -75.67685452 | -70.1180   | -75.50183706 | -56.8615 | -75.67063401 |  |
| 1.828 |              |          |              |             | -75.45861120 | -27.2376  | -75.50152989 | -56.6688  | -75.67299461 | -67.6959   | -75.49806620 | -54.4953 | -75.66679705 |  |
| 1.848 |              |          |              |             | -75.45497784 | -24.9577  | -75.49793131 | -54.4106  | -75.66917471 | -65.2988   | -75.49438030 | -52.1823 | -75.66302830 |  |
| 1.868 |              |          |              |             | -75.45154721 | -22.8049  | -75.49437752 | -52.1806  | -75.66540158 | -62.9312   | -75.49077603 | -49.9206 | -75.65932919 |  |
| 1.888 |              |          |              |             | -75.44831685 | -20.7778  | -75.49087522 | -49.9828  | -75.66168118 | -60.5966   | -75.48725224 | -47.7094 | -75.65570153 |  |
| 1.908 |              |          |              |             | -75.44528322 | -18.8742  | -75.48743040 | -47.8212  | -75.65801880 | -58.2984   | -75.48380920 | -45.5489 | -75.65214728 |  |
| 1.928 |              |          |              |             | -75.44244181 | -17.0912  | -75.48404845 | -45.6990  | -75.65441909 | -56.0396   | -75.48044799 | -43.4397 | -75.64866845 |  |
| 1.948 |              |          |              |             | -75.43978733 | -15.4255  | -75.48073419 | -43.6193  | -75.65088619 | -53.8226   | -75.47717016 | -41.3828 | -75.64526699 |  |
| 1.968 |              |          |              |             | -75.43731378 | -13.8733  | -75.47749196 | -41.5847  | -75.64742371 | -51.6499   | -75.47397749 | -39.3794 | -75.64194475 |  |
| 1.988 |              |          |              |             | -75.43501461 | -12.4306  | -75.47432564 | -39.5978  | -75.64403485 | -49.5233   | -75.47087184 | -37.4306 | -75.63870341 |  |
| 2.008 |              |          |              |             | -75.43288288 | -11.0929  | -75.47123871 | -37.6607  | -75.64072242 | -47.4448   | -75.46785506 | -35.5375 | -75.63554453 |  |
| 2.028 |              |          |              |             | -75.43091135 | -9.8557   | -75.46823429 | -35.7754  | -75.63748888 | -45.4157   | -75.46492890 | -33.7013 | -75.63246945 |  |
| 2.048 |              |          |              |             | -75.42909262 | -8.7144   | -75.46531515 | -33.9437  | -75.63433636 | -43.4374   | -75.46209497 | -31.9230 | -75.62947935 |  |

|       |  |              |         |              |          |              |          |              |          |              |
|-------|--|--------------|---------|--------------|----------|--------------|----------|--------------|----------|--------------|
| 2.068 |  | -75.42741919 | -7.6644 | -75.46248372 | -32.1669 | -75.63126671 | -41.5112 | -75.45935471 | -30.2034 | -75.62657524 |
| 2.088 |  | -75.42588354 | -6.7007 | -75.45974215 | -30.4465 | -75.62828151 | -39.6380 | -75.45670934 | -28.5435 | -75.62375791 |
| 2.108 |  | -75.42447816 | -5.8188 | -75.45709225 | -28.7837 | -75.62538210 | -37.8186 | -75.45415989 | -26.9436 | -75.62102799 |
| 2.128 |  | -75.42319558 | -5.0140 | -75.45453553 | -27.1793 | -75.62256958 | -36.0537 | -75.45170711 | -25.4045 | -75.61838591 |
| 2.148 |  | -75.42202838 | -4.2816 | -75.45207320 | -25.6342 | -75.61984480 | -34.3439 | -75.44935152 | -23.9264 | -75.61583194 |
| 2.168 |  | -75.42096920 | -3.6169 | -75.44970615 | -24.1489 | -75.61720843 | -32.6895 | -75.44709335 | -22.5093 | -75.61336612 |
| 2.188 |  | -75.42001079 | -3.0155 | -75.44743495 | -22.7237 | -75.61466091 | -31.0909 | -75.44493254 | -21.1534 | -75.61098834 |
| 2.208 |  | -75.41914603 | -2.4729 | -75.44525983 | -21.3588 | -75.61220247 | -29.5482 | -75.44286873 | -19.8583 | -75.60869829 |
| 2.228 |  | -75.41836798 | -1.9846 | -75.44318073 | -20.0541 | -75.60983313 | -28.0614 | -75.44090128 | -18.6237 | -75.60649549 |
| 2.278 |  | -75.41675872 | -0.9748 | -75.43839943 | -17.0538 | -75.60429792 | -24.5880 | -75.43639714 | -15.7974 | -75.60136532 |
| 2.328 |  | -75.41555330 | -0.2184 | -75.43419916 | -14.4181 | -75.59930951 | -21.4578 | -75.43246523 | -13.3300 | -75.59676037 |
| 2.378 |  | -75.41466835 | 0.3369  | -75.43055232 | -12.1296 | -75.59485168 | -18.6604 | -75.42907164 | -11.2005 | -75.59265870 |
| 2.428 |  | -75.41403470 | 0.7345  | -75.42742086 | -10.1646 | -75.59090082 | -16.1812 | -75.42617365 | -9.3820  | -75.58903252 |
| 2.478 |  | -75.41359634 | 1.0096  | -75.42475883 | -8.9492  | -75.58742669 | -14.0012 | -75.42372236 | -7.8438  | -75.58584911 |
| 2.528 |  | -75.41330858 | 1.1902  | -75.42251548 | -7.0865  | -75.58439363 | -12.0979 | -75.42166574 | -6.5533  | -75.58307207 |
| 2.578 |  | -75.41313599 | 1.2985  | -75.42063839 | -5.9086  | -75.58176211 | -10.4466 | -75.41995150 | -5.4776  | -75.58066267 |
| 2.628 |  | -75.41305059 | 1.3521  | -75.41907629 | -4.9283  | -75.57949063 | -9.0212  | -75.41852956 | -4.5853  | -75.57858143 |
| 2.678 |  | -75.41303023 | 1.3649  | -75.41778120 | -4.1156  | -75.57753756 | -7.7957  | -75.41735378 | -3.8475  | -75.57678957 |
| 2.728 |  | -75.41305738 | 1.3478  | -75.41670979 | -3.4433  | -75.57586272 | -6.7447  | -75.41638302 | -3.2383  | -75.57525024 |
| 2.778 |  | -75.41311807 | 1.3097  | -75.41582408 | -2.8875  | -75.57442864 | -5.8448  | -75.41558156 | -2.7354  | -75.57392938 |
| 2.828 |  | -75.41320112 | 1.2576  | -75.41509149 | -2.4278  | -75.57320130 | -5.0746  | -75.41491901 | -2.3196  | -75.57279624 |
| 2.878 |  | -75.41329761 | 1.1971  | -75.41448461 | -2.0470  | -75.57215046 | -4.4152  | -75.41436999 | -1.9751  | -75.57182360 |
| 2.928 |  | -75.41340057 | 1.1325  | -75.41398069 | -1.7308  | -75.57124972 | -3.8500  | -75.41391355 | -1.6887  | -75.57098770 |
| 2.978 |  | -75.41350497 | 1.0670  | -75.41356100 | -1.4674  | -75.57047634 | -3.3647  | -75.41353258 | -1.4496  | -75.57026805 |
| 3.028 |  | -75.41360752 | 1.0026  | -75.41321319 | -1.2492  | -75.56981090 | -2.9471  | -75.41321027 | -1.2474  | -75.56964718 |
| 3.078 |  | -75.41370631 | 0.9406  | -75.41294415 | -1.0804  | -75.56923698 | -2.5870  | -75.41291606 | -1.0628  | -75.56911024 |
| 3.128 |  | -75.41380032 | 0.8816  | -75.41271644 | -0.9375  | -75.56874071 | -2.2755  | -75.41266833 | -0.9073  | -75.56864469 |
| 3.178 |  | -75.41388911 | 0.8259  | -75.41252278 | -0.8159  | -75.56831045 | -2.0056  | -75.41245890 | -0.7759  | -75.56823997 |
| 3.228 |  | -75.41397255 | 0.7735  | -75.41235730 | -0.7121  | -75.56793643 | -1.7709  | -75.41228120 | -0.6644  | -75.56788720 |
| 3.278 |  | -75.41405071 | 0.7245  | -75.41221527 | -0.6230  | -75.56761044 | -1.5663  | -75.41212985 | -0.5694  | -75.56757891 |
| 3.328 |  | -75.41412378 | 0.6786  | -75.41209288 | -0.5462  | -75.56732562 | -1.3876  | -75.41200054 | -0.4883  | -75.56730884 |
| 3.378 |  | -75.41419199 | 0.6358  | -75.41198702 | -0.4797  | -75.56707618 | -1.2310  | -75.41188970 | -0.4187  | -75.56707169 |
| 3.428 |  | -75.41425560 | 0.5959  | -75.41189515 | -0.4221  | -75.56686298 | -1.0973  | -75.41179447 | -0.3589  | -75.56685725 |
| 3.478 |  | -75.41431490 | 0.5587  | -75.41181520 | -0.3719  | -75.56667896 | -0.9818  | -75.41171247 | -0.3075  | -75.56666473 |
| 3.528 |  | -75.41437017 | 0.5240  | -75.41174546 | -0.3282  | -75.56651640 | -0.8798  | -75.41164174 | -0.2631  | -75.56649513 |
| 3.578 |  | -75.41442166 | 0.4917  | -75.41168449 | -0.2899  | -75.56637255 | -0.7895  | -75.41158067 | -0.2248  | -75.56634548 |
| 3.628 |  | -75.41446963 | 0.4616  | -75.41163112 | -0.2564  | -75.56624508 | -0.7095  | -75.41152788 | -0.1917  | -75.56621326 |
| 3.678 |  | -75.41451433 | 0.4336  | -75.41158432 | -0.2270  | -75.56613196 | -0.6385  | -75.41148225 | -0.1630  | -75.56609622 |
| 3.728 |  | -75.41455598 | 0.4074  | -75.41154325 | -0.2013  | -75.56603144 | -0.5755  | -75.41144280 | -0.1383  | -75.56599266 |
| 3.778 |  | -75.41459479 | 0.3831  | -75.41150716 | -0.1786  | -75.56594201 | -0.5193  | -75.41140870 | -0.1169  | -75.56590078 |
| 3.828 |  | -75.41463097 | 0.3604  | -75.41147542 | -0.1587  | -75.56586234 | -0.4693  | -75.41137924 | -0.0984  | -75.56581925 |
| 3.878 |  | -75.41466471 | 0.3392  | -75.41144748 | -0.1412  | -75.56579129 | -0.4248  | -75.41135381 | -0.0824  | -75.56574680 |
| 3.928 |  | -75.41469618 | 0.3195  | -75.41142286 | -0.1257  | -75.56572783 | -0.3849  | -75.41133185 | -0.0686  | -75.56568236 |
| 3.978 |  | -75.41472555 | 0.3010  | -75.41140116 | -0.1121  | -75.56565710 | -0.3493  | -75.41131292 | -0.0568  | -75.56562500 |
| 4.028 |  | -75.41475296 | 0.2838  | -75.41138199 | -0.1001  | -75.56562030 | -0.3175  | -75.41129660 | -0.0465  | -75.56557387 |
| 4.078 |  | -75.41477857 | 0.2678  | -75.41136504 | -0.0894  | -75.56557476 | -0.2889  | -75.41128254 | -0.0377  | -75.56552826 |
| 4.128 |  | -75.41480250 | 0.2527  | -75.41135004 | -0.0800  | -75.56553388 | -0.2632  | -75.41127042 | -0.0301  | -75.56548752 |
| 4.178 |  | -75.41482488 | 0.2387  | -75.41133674 | -0.0717  | -75.56549714 | -0.2402  | -75.41126000 | -0.0236  | -75.56545109 |
| 4.228 |  | -75.41484583 | 0.2256  | -75.41132493 | -0.0643  | -75.56546406 | -0.2194  | -75.41125103 | -0.0179  | -75.56541848 |
| 4.278 |  | -75.41486544 | 0.2132  | -75.41131444 | -0.0577  | -75.56543425 | -0.2007  | -75.41124331 | -0.0131  | -75.56538925 |
| 4.328 |  | -75.41488382 | 0.2017  | -75.41130509 | -0.0518  | -75.56540734 | -0.1838  | -75.41123668 | -0.0089  | -75.56536303 |
| 4.378 |  | -75.41490105 | 0.1909  | -75.41129676 | -0.0466  | -75.56538303 | -0.1686  | -75.41123099 | -0.0054  | -75.56533948 |
| 4.428 |  | -75.41491723 | 0.1807  | -75.41128933 | -0.0419  | -75.56536104 | -0.1548  | -75.41122612 | -0.0023  | -75.56531832 |
| 4.478 |  | -75.41493242 | 0.1712  | -75.41128269 | -0.0378  | -75.56534112 | -0.1423  | -75.41122196 | 0.0003   | -75.56529928 |
| 4.528 |  | -75.41494669 | 0.1623  | -75.41127675 | -0.0340  | -75.56532307 | -0.1309  | -75.41121842 | 0.0025   | -75.56528215 |
| 4.578 |  | -75.41496011 | 0.1538  | -75.41127144 | -0.0307  | -75.56530668 | -0.1207  | -75.41121542 | 0.0044   | -75.56526671 |
| 4.628 |  | -75.41497273 | 0.1459  | -75.41126669 | -0.0277  | -75.56529180 | -0.1113  | -75.41121290 | 0.0060   | -75.56525281 |
| 4.678 |  | -75.41498462 | 0.1385  | -75.41126244 | -0.0251  | -75.56527828 | -0.1028  | -75.41121080 | 0.0073   | -75.56524028 |
| 4.728 |  | -75.41499581 | 0.1314  | -75.41125864 | -0.0227  | -75.56526598 | -0.0951  | -75.41120908 | 0.0084   | -75.56522898 |
| 4.828 |  | -75.41501629 | 0.1186  | -75.41125221 | -0.0186  | -75.56524458 | -0.0817  | -75.41120657 | 0.0100   | -75.56520961 |
| 4.928 |  | -75.41503450 | 0.1072  | -75.41124709 | -0.0154  | -75.56522680 | -0.0705  | -75.41120509 | 0.0109   | -75.56519386 |
| 5.028 |  | -75.41505071 | 0.0970  | -75.41124302 | -0.0129  | -75.56521198 | -0.0612  | -75.41120441 | 0.0113   | -75.56518106 |
| 5.128 |  | -75.41506516 | 0.0879  | -75.41123979 | -0.0108  | -75.56519958 | -0.0535  | -75.41120434 | 0.0114   | -75.56517064 |
| 5.228 |  | -75.41507804 | 0.0798  | -75.41123722 | -0.0092  | -75.56518900 | -0.0468  | -75.41120470 | 0.0111   | -75.56516192 |
| 5.328 |  | -75.41508955 | 0.0726  | -75.41123519 | -0.0080  | -75.56518022 | -0.0413  | -75.41120537 | 0.0107   | -75.56515500 |
| 5.428 |  | -75.41509984 | 0.0662  | -75.41123356 | -0.0069  | -75.56517255 | -0.0365  | -75.41120624 | 0.0102   | -75.56514929 |
| 5.528 |  | -75.41510905 | 0.0604  | -75.41123225 | -0.0061  | -75.56516620 | -0.0325  | -75.41120721 | 0.0096   | -75.56514459 |
| 5.628 |  | -75.41511730 | 0.0552  | -75.41123118 | -0.0054  | -75.56516075 | -0.0291  | -75.41120823 | 0.0089   | -75.56514067 |
| 5.728 |  | -75.41512471 | 0.0506  | -75.41123029 | -0.0049  | -75.56515602 | -0.0261  | -75.41120925 | 0.0083   | -75.56513737 |
| 5.828 |  | -75.41513138 | 0.0464  | -75.41122953 | -0.0044  | -75.56515189 | -0.0235  | -75.41121023 | 0.0077   | -75.56513458 |
| 5.928 |  | -75.41513738 | 0.0426  | -75.41122888 | -0.0040  | -75.56514827 | -0.0213  | -75.41121115 | 0.0071   | -75.56513218 |
| 6.028 |  | -75.41514280 | 0.0392  | -75.41122830 | -0.0036  | -75.56514508 | -0.0193  | -75.41121200 | 0.0066   | -75.56513013 |
| 6.128 |  | -75.41514769 | 0.0361  | -75.41122779 | -0.0033  | -75.56514224 | -0.0175  | -75.41121278 | 0.0061   | -75.56512833 |
| 6.228 |  | -75.41515213 | 0.0333  | -75.41122733 | -0.0030  | -75.56513972 | -0.0159  | -75.41121348 | 0.0056   | -75.56512675 |

|        |  |              |        |              |         |              |         |              |        |              |
|--------|--|--------------|--------|--------------|---------|--------------|---------|--------------|--------|--------------|
| 6.328  |  | -75.41515615 | 0.0308 | -75.41122691 | -0.0028 | -75.56513743 | -0.0145 | -75.41121412 | 0.0052 | -75.56512534 |
| 6.428  |  | -75.41515980 | 0.0285 | -75.41122652 | -0.0025 | -75.56513541 | -0.0132 | -75.41121469 | 0.0049 | -75.56512411 |
| 6.528  |  | -75.41516313 | 0.0264 | -75.41122616 | -0.0023 | -75.56513359 | -0.0120 | -75.41121520 | 0.0046 | -75.56512302 |
| 6.628  |  | -75.41516617 | 0.0245 | -75.41122583 | -0.0021 | -75.56513194 | -0.0110 | -75.41121566 | 0.0043 | -75.56512204 |
| 6.728  |  | -75.41516895 | 0.0228 | -75.41122552 | -0.0019 | -75.56513046 | -0.0101 | -75.41121608 | 0.0040 | -75.56512117 |
| 6.828  |  | -75.41517149 | 0.0212 | -75.41122524 | -0.0017 | -75.56512913 | -0.0092 | -75.41121646 | 0.0038 | -75.56512039 |
| 6.928  |  | -75.41517382 | 0.0197 | -75.41122498 | -0.0016 | -75.56512776 | -0.0084 | -75.41121680 | 0.0036 | -75.56511969 |
| 7.028  |  | -75.41517595 | 0.0184 | -75.41122474 | -0.0014 | -75.56512667 | -0.0077 | -75.41121711 | 0.0034 | -75.56511907 |
| 7.128  |  | -75.41517792 | 0.0172 | -75.41122452 | -0.0013 | -75.56512568 | -0.0071 | -75.41121740 | 0.0032 | -75.56511852 |
| 7.228  |  | -75.41517973 | 0.0160 | -75.41122432 | -0.0011 | -75.56512479 | -0.0065 | -75.41121767 | 0.0030 | -75.56511802 |
| 7.328  |  | -75.41518140 | 0.0150 | -75.41122414 | -0.0010 | -75.56512398 | -0.0060 | -75.41121792 | 0.0028 | -75.56511758 |
| 7.428  |  | -75.41518294 | 0.0140 | -75.41122397 | -0.0009 | -75.56512325 | -0.0056 | -75.41121815 | 0.0027 | -75.56511719 |
| 7.528  |  | -75.41518436 | 0.0131 | -75.41122383 | -0.0008 | -75.56512258 | -0.0051 | -75.41121838 | 0.0026 | -75.56511685 |
| 7.628  |  | -75.41518568 | 0.0123 | -75.41122369 | -0.0007 | -75.56512198 | -0.0048 | -75.41121858 | 0.0024 | -75.56511654 |
| 7.728  |  | -75.41518690 | 0.0115 | -75.41122357 | -0.0007 | -75.56512143 | -0.0044 | -75.41121878 | 0.0023 | -75.56511627 |
| 7.828  |  | -75.41518804 | 0.0108 | -75.41122347 | -0.0006 | -75.56512043 | -0.0038 | -75.41121897 | 0.0022 | -75.56511600 |
| 7.928  |  | -75.41518909 | 0.0102 | -75.41122337 | -0.0005 | -75.56511998 | -0.0035 | -75.41121915 | 0.0021 | -75.56511579 |
| 8.028  |  | -75.41519006 | 0.0095 | -75.41122329 | -0.0005 | -75.56511957 | -0.0032 | -75.41121932 | 0.0020 | -75.56511561 |
| 8.128  |  | -75.41519097 | 0.0090 | -75.41122321 | -0.0004 | -75.56511920 | -0.0030 | -75.41121948 | 0.0019 | -75.56511545 |
| 8.228  |  | -75.41519181 | 0.0084 | -75.41122314 | -0.0004 | -75.56511886 | -0.0028 | -75.41121963 | 0.0018 | -75.56511530 |
| 8.328  |  | -75.41519260 | 0.0080 | -75.41122308 | -0.0004 | -75.56511856 | -0.0026 | -75.41121978 | 0.0017 | -75.56511518 |
| 8.428  |  | -75.41519333 | 0.0075 | -75.41122303 | -0.0003 | -75.56511828 | -0.0024 | -75.41121992 | 0.0016 | -75.56511507 |
| 8.528  |  | -75.41519402 | 0.0071 | -75.41122298 | -0.0003 | -75.56511802 | -0.0023 | -75.41122005 | 0.0015 | -75.56511497 |
| 8.628  |  | -75.41519466 | 0.0067 | -75.41122294 | -0.0003 | -75.56511778 | -0.0021 | -75.41122018 | 0.0014 | -75.56511489 |
| 8.728  |  | -75.41519525 | 0.0063 | -75.41122290 | -0.0003 | -75.56511757 | -0.0020 | -75.41122029 | 0.0014 | -75.56511482 |
| 8.828  |  | -75.41519581 | 0.0059 | -75.41122287 | -0.0002 | -75.56511737 | -0.0019 | -75.41122041 | 0.0013 | -75.56511475 |
| 8.928  |  | -75.41519633 | 0.0056 | -75.41122284 | -0.0002 | -75.56511719 | -0.0018 | -75.41122051 | 0.0012 | -75.56511470 |
| 9.028  |  | -75.41519682 | 0.0053 | -75.41122281 | -0.0002 | -75.56511703 | -0.0017 | -75.41122061 | 0.0012 | -75.56511465 |
| 9.128  |  | -75.41519728 | 0.0050 | -75.41122279 | -0.0002 | -75.56511688 | -0.0016 | -75.41122071 | 0.0011 | -75.56511461 |
| 9.228  |  | -75.41519771 | 0.0047 | -75.41122277 | -0.0002 | -75.56511674 | -0.0015 | -75.41122080 | 0.0010 | -75.56511457 |
| 9.328  |  | -75.41519811 | 0.0045 | -75.41122275 | -0.0002 | -75.56511661 | -0.0014 | -75.41122088 | 0.0010 | -75.56511454 |
| 9.428  |  | -75.41519849 | 0.0043 | -75.41122273 | -0.0001 | -75.56511649 | -0.0013 | -75.41122096 | 0.0009 | -75.56511452 |
| 9.528  |  | -75.41519885 | 0.0040 | -75.41122272 | -0.0001 | -75.56511638 | -0.0012 | -75.41122104 | 0.0009 | -75.56511450 |
| 9.628  |  | -75.41519918 | 0.0038 | -75.41122270 | -0.0001 | -75.56511628 | -0.0012 | -75.41122111 | 0.0008 | -75.56511448 |
| 9.728  |  | -75.41519949 | 0.0036 | -75.41122269 | -0.0001 | -75.56511619 | -0.0011 | -75.41122118 | 0.0008 | -75.56511446 |
| 20.000 |  | -75.41520527 | 0.0000 | -75.41122250 | 0.0000  | -75.56511440 | 0.0000  | -75.41122246 | 0.0000 | -75.56511436 |

|             | E(R=20.0)<br>-75.41122227 |           | E(R=20.0)<br>-75.56511417 |             | DCE(R=20.0)<br>-94.0694 |                   | Re<br>1.248      |                |                   |
|-------------|---------------------------|-----------|---------------------------|-------------|-------------------------|-------------------|------------------|----------------|-------------------|
|             |                           |           |                           |             | DCE                     |                   | DCE (Re-shifted) |                |                   |
| ΔE2(vCASC1) | ΔE3(vCAS)                 | ΔE3(vCAS) | E3(vCASC1)                | ΔE3(vCASC1) | vCASC11-SCGV B          | Δ(vCASC11-SCGV B) | ΔR               | vCASC11-SCGV B | Δ(vCASC11-SCGV B) |
| 167.8758    | -75.02170895              | 244.4233  | -75.21985577              | 216.6530    | -123.7924               | -29.7230          | -0.330           | -123.7924      | -29.7230          |
| 151.0069    | -75.05662965              | 222.5103  | -75.25410479              | 195.1614    | -123.7600               | -29.6906          | -0.320           | -123.7600      | -29.6906          |
| 135.0784    | -75.08964905              | 201.7903  | -75.28645971              | 174.8583    | -123.7389               | -29.6695          | -0.310           | -123.7389      | -29.6695          |
| 120.0309    | -75.12086230              | 182.2037  | -75.31701521              | 155.6845    | -123.7284               | -29.6590          | -0.300           | -123.7284      | -29.6590          |
| 105.8079    | -75.15035941              | 163.6939  | -75.34586113              | 137.5834    | -123.7279               | -29.6585          | -0.290           | -123.7279      | -29.6585          |
| 92.3566     | -75.17822546              | 146.2077  | -75.37308272              | 120.5016    | -123.7369               | -29.6675          | -0.280           | -123.7369      | -29.6675          |
| 79.6275     | -75.20454083              | 129.6946  | -75.39876090              | 104.3883    | -123.7546               | -29.6852          | -0.270           | -123.7546      | -29.6852          |
| 67.5753     | -75.22938145              | 114.1069  | -75.42297247              | 89.1953     | -123.7805               | -29.7111          | -0.260           | -123.7805      | -29.7111          |
| 56.1585     | -75.25281909              | 99.3995   | -75.44579036              | 74.8768     | -123.8139               | -29.7445          | -0.250           | -123.8139      | -29.7445          |
| 45.3401     | -75.27492169              | 85.5299   | -75.46728385              | 61.3895     | -123.8543               | -29.7849          | -0.240           | -123.8543      | -29.7849          |
| 35.0870     | -75.29575363              | 72.4577   | -75.48751873              | 48.6919     | -123.9010               | -29.8316          | -0.230           | -123.9010      | -29.8316          |
| 25.3701     | -75.31537610              | 60.1444   | -75.50655758              | 36.7448     | -123.9534               | -29.8840          | -0.220           | -123.9534      | -29.8840          |
| 16.1637     | -75.33384735              | 48.5535   | -75.52445988              | 25.5110     | -124.0111               | -29.9416          | -0.210           | -124.0111      | -29.9416          |
| 7.4451      | -75.35122301              | 37.6501   | -75.54128225              | 14.9548     | -124.0733               | -30.0039          | -0.200           | -124.0733      | -30.0039          |
| -0.8058     | -75.36755624              | 27.4009   | -75.55707854              | 5.0424      | -124.1396               | -30.0702          | -0.190           | -124.1396      | -30.0702          |
| -8.6072     | -75.38289791              | 17.7738   | -75.57190003              | -4.2582     | -124.2095               | -30.1400          | -0.180           | -124.2095      | -30.1400          |
| -22.9274    | -75.41079939              | 0.2654    | -75.59881141              | -21.1453    | -124.3578               | -30.2884          | -0.160           | -124.3578      | -30.2884          |
| -35.9342    | -75.43529256              | -15.1043  | -75.62190701              | -35.6381    | -124.5143               | -30.4449          | -0.140           | -124.5143      | -30.4449          |
| -48.8314    | -75.45671099              | -28.5446  | -75.63977805              | -46.8523    | -124.6753               | -30.6059          | -0.120           | -124.6753      | -30.6059          |
| -60.0234    | -75.47535830              | -40.2460  | -75.65543840              | -56.6793    | -124.8373               | -30.7679          | -0.100           | -124.8373      | -30.7679          |
| -69.6793    | -75.49151002              | -50.3813  | -75.66905690              | -65.2251    | -124.9970               | -30.9276          | -0.080           | -124.9970      | -30.9276          |
| -77.9524    | -75.50541563              | -59.1072  | -75.68079716              | -72.5922    | -125.1513               | -31.0819          | -0.060           | -125.1513      | -31.0819          |
| -84.9811    | -75.51623843              | -65.8986  | -75.69081642              | -78.8794    | -125.2975               | -31.2281          | -0.040           | -125.2975      | -31.2281          |
| -90.8911    | -75.52518887              | -71.5151  | -75.69926427              | -84.1805    | -125.4331               | -31.3637          | -0.020           | -125.4331      | -31.3637          |
| -95.7961    | -75.53268765              | -76.2207  | -75.70628168              | -88.5840    | -125.5560               | -31.4866          | 0.000            | -125.5560      | -31.4866          |
| -99.7993    | -75.53886977              | -80.1000  | -75.71200055              | -92.1726    | -125.6645               | -31.5951          | 0.020            | -125.6645      | -31.5951          |
| -102.9940   | -75.54386062              | -80.1000  | -75.71654332              | -95.0232    | -125.7572               | -31.6878          | 0.040            | -125.7572      | -31.6878          |
| -105.4650   | -75.54777606              | -83.2318  | -75.72002305              | -97.2068    | -125.8332               | -31.7638          | 0.060            | -125.8332      | -31.7638          |
| -107.2892   | -75.55072278              | -85.6888  | -75.72254357              | -98.7885    | -125.8921               | -31.8227          | 0.080            | -125.8921      | -31.8227          |
| -108.5361   | -75.55279870              | -87.5379  | -75.72419973              | -99.8277    | -125.9342               | -31.8648          | 0.100            | -125.9342      | -31.8648          |
| -109.2689   | -75.55409339              | -88.8406  | -75.72507770              | -100.3787   | -125.9602               | -31.8908          | 0.120            | -125.9602      | -31.8908          |
| -109.5449   | -75.55468855              | -89.6530  | -75.72525515              | -100.4900   | -125.9718               | -31.9024          | 0.140            | -125.9718      | -31.9024          |
| -109.4160   | -75.55465847              | -90.0265  | -75.72480154              | -100.2054   | -125.9717               | -31.9023          | 0.160            | -125.9717      | -31.9023          |
| -108.9292   | -75.55407047              | -90.0076  | -75.72377821              | -99.5632    | -125.9638               | -31.8944          | 0.180            | -125.9638      | -31.8944          |
| -108.1272   | -75.55298518              | -89.6386  | -75.72223830              | -98.5969    | -125.9534               | -31.8840          | 0.200            | -125.9534      | -31.8840          |
| -107.0485   | -75.55145693              | -88.9576  | -75.72022669              | -97.3346    | -125.9480               | -31.8786          | 0.220            | -125.9480      | -31.8786          |
| -105.7281   | -75.54953381              | -87.9986  | -75.71777973              | -95.7991    | -125.9570               | -31.8876          | 0.240            | -125.9570      | -31.8876          |
| -104.1975   | -75.54725778              | -86.7918  | -75.71492525              | -94.0079    | -125.9926               | -31.9232          | 0.260            | -125.9926      | -31.9232          |
| -102.4853   | -75.54466445              | -85.3636  | -75.71168310              | -91.9734    | -126.0694               | -32.0000          | 0.280            | -126.0694      | -32.0000          |
| -100.6173   | -75.54178265              | -83.7362  | -75.70806714              | -89.7044    | -126.2034               | -32.1340          | 0.300            | -126.2034      | -32.1340          |
| -98.6166    | -75.53863373              | -81.9279  | -75.70408969              | -87.2085    | -126.4093               | -32.3399          | 0.320            | -126.4093      | -32.3399          |
| -96.5043    | -75.53523065              | -79.9519  | -75.69976861              | -84.4970    | -126.6965               | -32.6271          | 0.340            | -126.6965      | -32.6271          |
| -93.2863    | -75.53157726              | -77.8164  | -75.69513485              | -81.5892    | -128.0770               | -34.0075          | 0.360            | -128.0770      | -34.0075          |
| -90.1962    | -75.52766911              | -75.5239  | -75.69023640              | -78.5154    | -129.3212               | -35.2518          | 0.380            | -129.3212      | -35.2518          |
| -87.2317    | -75.52349814              | -73.0715  | -75.68513519              | -75.3143    | -130.4232               | -36.3537          | 0.400            | -130.4232      | -36.3537          |
| -84.3750    | -75.51906333              | -70.4542  | -75.67989885              | -72.0285    | -131.3862               | -37.3168          | 0.420            | -131.3862      | -37.3168          |
| -81.6071    | -75.51438458              | -67.6713  | -75.67459211              | -68.6985    | -132.2139               | -38.1445          | 0.440            | -132.2139      | -38.1445          |
| -78.9117    | -75.50950970              | -64.7353  | -75.66927151              | -65.3597    | -132.9096               | -38.8402          | 0.460            | -132.9096      | -38.8402          |
| -76.2767    | -75.50450677              | -61.6763  | -75.66398363              | -62.0415    | -133.4771               | -39.4077          | 0.480            | -133.4771      | -39.4077          |
| -73.6936    | -75.49944809              | -58.5369  | -75.65876568              | -58.7672    | -133.9201               | -39.8507          | 0.500            | -133.9201      | -39.8507          |
| -71.1572    | -75.49439765              | -55.3625  | -75.65364685              | -55.5551    | -134.2424               | -40.1730          | 0.520            | -134.2424      | -40.1730          |
| -68.6646    | -75.48940647              | -52.1933  | -75.64864994              | -52.4195    | -134.4482               | -40.3788          | 0.540            | -134.4482      | -40.3788          |
| -66.2146    | -75.48451330              | -49.0613  | -75.64379265              | -49.3715    | -134.5418               | -40.4724          | 0.560            | -134.5418      | -40.4724          |
| -63.8069    | -75.47974704              | -45.9908  | -75.63908870              | -46.4197    | -134.5276               | -40.4582          | 0.580            | -134.5276      | -40.4582          |
| -61.4419    | -75.47512920              | -43.0000  | -75.63454867              | -43.5708    | -134.4106               | -40.3412          | 0.600            | -134.4106      | -40.3412          |
| -59.1207    | -75.47067584              | -40.1022  | -75.63018045              | -40.8297    | -134.1957               | -40.1263          | 0.620            | -134.1957      | -40.1263          |
| -56.8443    | -75.46639894              | -37.3077  | -75.62598989              | -38.2001    | -133.8882               | -39.8187          | 0.640            | -133.8882      | -39.8187          |
| -54.6140    | -75.46230729              | -34.6239  | -75.62198095              | -35.6845    | -133.4936               | -39.4242          | 0.660            | -133.4936      | -39.4242          |
| -52.4310    | -75.45840715              | -32.0563  | -75.61815604              | -33.2843    | -133.0178               | -38.9484          | 0.680            | -133.0178      | -38.9484          |
| -50.2965    | -75.45470262              | -29.6090  | -75.61451620              | -31.0002    | -132.4666               | -38.3971          | 0.700            | -132.4666      | -38.3971          |
| -48.2118    | -75.45119596              | -27.2843  | -75.61106128              | -28.8323    | -131.8460               | -37.7766          | 0.720            | -131.8460      | -37.7766          |
| -46.1778    | -75.44788777              | -25.0839  | -75.60779000              | -26.7795    | -131.1622               | -37.0928          | 0.740            | -131.1622      | -37.0928          |
| -44.1956    | -75.44447716              | -23.0080  | -75.60470004              | -24.8405    | -130.4213               | -36.3519          | 0.760            | -130.4213      | -36.3519          |
| -42.2660    | -75.44186183              | -21.0560  | -75.60178826              | -23.0133    | -129.6294               | -35.5600          | 0.780            | -129.6294      | -35.5600          |
| -40.3896    | -75.43913826              | -19.2266  | -75.59905071              | -21.2955    | -128.7924               | -34.7230          | 0.800            | -128.7924      | -34.7230          |

|          |              |          |              |          |           |          |       |           |          |
|----------|--------------|----------|--------------|----------|-----------|----------|-------|-----------|----------|
| -38.5673 | -75.43660173 | -17.5176 | -75.59648265 | -19.6840 | -127.9163 | -33.8469 | 0.820 | -127.9163 | -33.8469 |
| -36.7994 | -75.43424653 | -15.9259 | -75.59407876 | -18.1756 | -127.0067 | -32.9373 | 0.840 | -127.0067 | -32.9373 |
| -35.0863 | -75.43206604 | -14.4479 | -75.59183318 | -16.7664 | -126.0692 | -31.9997 | 0.860 | -126.0692 | -31.9997 |
| -33.4284 | -75.43005288 | -13.0797 | -75.58973958 | -15.4527 | -125.1091 | -31.0397 | 0.880 | -125.1091 | -31.0397 |
| -31.8258 | -75.42819910 | -11.8164 | -75.58779129 | -14.2301 | -124.1317 | -30.0623 | 0.900 | -124.1317 | -30.0623 |
| -30.2784 | -75.42649626 | -10.6531 | -75.58598140 | -13.0944 | -123.1420 | -29.0726 | 0.920 | -123.1420 | -29.0726 |
| -28.7864 | -75.42493563 | -9.5846  | -75.58430269 | -12.0410 | -122.1448 | -28.0754 | 0.940 | -122.1448 | -28.0754 |
| -27.3493 | -75.42350833 | -8.6053  | -75.58274799 | -11.0654 | -121.1448 | -27.0754 | 0.960 | -121.1448 | -27.0754 |
| -25.9671 | -75.42220545 | -7.7096  | -75.58131009 | -10.1631 | -120.1462 | -26.0768 | 0.980 | -120.1462 | -26.0768 |
| -22.7478 | -75.41943527 | -6.8921  | -75.57817948 | -8.1986  | -117.6826 | -23.6132 | 1.030 | -117.6826 | -23.6132 |
| -19.8582 | -75.41725767 | -5.1537  | -75.57562672 | -6.5967  | -115.3088 | -21.2394 | 1.080 | -115.3088 | -21.2394 |
| -17.2843 | -75.41555654 | -3.7873  | -75.57355369 | -5.2959  | -113.0668 | -18.9974 | 1.130 | -113.0668 | -18.9974 |
| -15.0089 | -75.41423340 | -2.7198  | -75.57187410 | -4.2419  | -110.9852 | -16.9158 | 1.180 | -110.9852 | -16.9158 |
| -13.0113 | -75.41320762 | -1.8895  | -75.57051451 | -3.3888  | -109.0802 | -15.0108 | 1.230 | -109.0802 | -15.0108 |
| -11.2686 | -75.41241474 | -1.2458  | -75.56941377 | -2.6980  | -107.3575 | -13.2881 | 1.280 | -107.3575 | -13.2881 |
| -9.7567  | -75.41180404 | -0.7483  | -75.56852182 | -2.1383  | -105.8145 | -11.7451 | 1.330 | -105.8145 | -11.7451 |
| -8.4507  | -75.41133589 | -0.3651  | -75.56779814 | -1.6842  | -104.4427 | -10.3733 | 1.380 | -104.4427 | -10.3733 |
| -7.3263  | -75.41097947 | -0.0713  | -75.56721016 | -1.3153  | -103.2299 | -9.1605  | 1.430 | -103.2299 | -9.1605  |
| -6.3604  | -75.41071071 | 0.1524   | -75.56673182 | -1.0151  | -102.1619 | -8.0925  | 1.480 | -102.1619 | -8.0925  |
| -5.5315  | -75.41051083 | 0.3210   | -75.56634228 | -0.7707  | -101.2239 | -7.1545  | 1.530 | -101.2239 | -7.1545  |
| -4.8205  | -75.41036510 | 0.4464   | -75.56602484 | -0.5715  | -100.4016 | -6.3322  | 1.580 | -100.4016 | -6.3322  |
| -4.2101  | -75.41026190 | 0.5379   | -75.56576612 | -0.4091  | -99.6817  | -5.6123  | 1.630 | -99.6817  | -5.6123  |
| -3.6856  | -75.41019209 | 0.6026   | -75.56555537 | -0.2769  | -99.0519  | -4.9824  | 1.680 | -99.0519  | -4.9824  |
| -3.2340  | -75.41014841 | 0.6464   | -75.56538391 | -0.1693  | -98.5010  | -4.4316  | 1.730 | -98.5010  | -4.4316  |
| -2.8444  | -75.41012511 | 0.6739   | -75.56524472 | -0.0819  | -98.0191  | -3.9497  | 1.780 | -98.0191  | -3.9497  |
| -2.5075  | -75.41011762 | 0.6885   | -75.56513208 | -0.0112  | -97.5970  | -3.5276  | 1.830 | -97.5970  | -3.5276  |
| -2.2153  | -75.41012231 | 0.6932   | -75.56504133 | 0.0457   | -97.2266  | -3.1572  | 1.880 | -97.2266  | -3.1572  |
| -1.9614  | -75.41013631 | 0.6902   | -75.56496867 | 0.0913   | -96.9009  | -2.8315  | 1.930 | -96.9009  | -2.8315  |
| -1.7400  | -75.41015732 | 0.6815   | -75.56491095 | 0.1275   | -96.6138  | -2.5444  | 1.980 | -96.6138  | -2.5444  |
| -1.5465  | -75.41018351 | 0.6683   | -75.56486563 | 0.1560   | -96.3602  | -2.2908  | 2.030 | -96.3602  | -2.2908  |
| -1.3771  | -75.41021345 | 0.6518   | -75.56483056 | 0.1780   | -96.1356  | -2.0662  | 2.080 | -96.1356  | -2.0662  |
| -1.2282  | -75.41024600 | 0.6330   | -75.56480399 | 0.1946   | -95.9363  | -1.8669  | 2.130 | -95.9363  | -1.8669  |
| -1.0937  | -75.41028025 | 0.6126   | -75.56478442 | 0.2069   | -95.7626  | -1.6932  | 2.180 | -95.7626  | -1.6932  |
| -0.9729  | -75.41031550 | 0.5911   | -75.56477067 | 0.2155   | -95.6099  | -1.5405  | 2.230 | -95.6099  | -1.5405  |
| -0.8664  | -75.41035120 | 0.5690   | -75.56476173 | 0.2212   | -95.4732  | -1.4038  | 2.280 | -95.4732  | -1.4038  |
| -0.7725  | -75.41038691 | 0.5466   | -75.56475672 | 0.2243   | -95.3506  | -1.2812  | 2.330 | -95.3506  | -1.2812  |
| -0.6896  | -75.41042230 | 0.5242   | -75.56475495 | 0.2254   | -95.2406  | -1.1711  | 2.380 | -95.2406  | -1.1711  |
| -0.6162  | -75.41045713 | 0.5020   | -75.56475581 | 0.2249   | -95.1415  | -1.0721  | 2.430 | -95.1415  | -1.0721  |
| -0.5511  | -75.41049118 | 0.4801   | -75.56475882 | 0.2230   | -95.0523  | -0.9829  | 2.480 | -95.0523  | -0.9829  |
| -0.4935  | -75.41052433 | 0.4588   | -75.56476356 | 0.2200   | -94.9718  | -0.9024  | 2.530 | -94.9718  | -0.9024  |
| -0.4423  | -75.41055646 | 0.4380   | -75.56476966 | 0.2162   | -94.8991  | -0.8297  | 2.580 | -94.8991  | -0.8297  |
| -0.3969  | -75.41058750 | 0.4178   | -75.56477685 | 0.2117   | -94.8334  | -0.7640  | 2.630 | -94.8334  | -0.7640  |
| -0.3564  | -75.41061741 | 0.3983   | -75.56478487 | 0.2066   | -94.7738  | -0.7044  | 2.680 | -94.7738  | -0.7044  |
| -0.3204  | -75.41064614 | 0.3796   | -75.56479351 | 0.2012   | -94.7198  | -0.6504  | 2.730 | -94.7198  | -0.6504  |
| -0.2883  | -75.41067369 | 0.3615   | -75.56480261 | 0.1955   | -94.6707  | -0.6013  | 2.780 | -94.6707  | -0.6013  |
| -0.2597  | -75.41070005 | 0.3442   | -75.56481201 | 0.1896   | -94.6261  | -0.5566  | 2.830 | -94.6261  | -0.5566  |
| -0.2342  | -75.41072525 | 0.3277   | -75.56482160 | 0.1836   | -94.5854  | -0.5160  | 2.880 | -94.5854  | -0.5160  |
| -0.2113  | -75.41074928 | 0.3119   | -75.56483128 | 0.1775   | -94.5483  | -0.4789  | 2.930 | -94.5483  | -0.4789  |
| -0.1908  | -75.41077218 | 0.2968   | -75.56484097 | 0.1714   | -94.5144  | -0.4450  | 2.980 | -94.5144  | -0.4450  |
| -0.1725  | -75.41079399 | 0.2824   | -75.56485060 | 0.1654   | -94.4834  | -0.4140  | 3.030 | -94.4834  | -0.4140  |
| -0.1560  | -75.41081472 | 0.2687   | -75.56486011 | 0.1594   | -94.4550  | -0.3855  | 3.080 | -94.4550  | -0.3855  |
| -0.1413  | -75.41083443 | 0.2557   | -75.56486947 | 0.1536   | -94.4289  | -0.3595  | 3.130 | -94.4289  | -0.3595  |
| -0.1280  | -75.41085315 | 0.2434   | -75.56487864 | 0.1478   | -94.4049  | -0.3355  | 3.180 | -94.4049  | -0.3355  |
| -0.1160  | -75.41087092 | 0.2316   | -75.56488759 | 0.1422   | -94.3829  | -0.3135  | 3.230 | -94.3829  | -0.3135  |
| -0.1053  | -75.41088778 | 0.2205   | -75.56489631 | 0.1367   | -94.3626  | -0.2932  | 3.280 | -94.3626  | -0.2932  |
| -0.0956  | -75.41090378 | 0.2099   | -75.56490479 | 0.1314   | -94.3439  | -0.2745  | 3.330 | -94.3439  | -0.2745  |
| -0.0869  | -75.41091895 | 0.1999   | -75.56491301 | 0.1262   | -94.3267  | -0.2572  | 3.380 | -94.3267  | -0.2572  |
| -0.0790  | -75.41093335 | 0.1903   | -75.56492096 | 0.1212   | -94.3107  | -0.2413  | 3.430 | -94.3107  | -0.2413  |
| -0.0719  | -75.41094700 | 0.1813   | -75.56492865 | 0.1164   | -94.2960  | -0.2266  | 3.480 | -94.2960  | -0.2266  |
| -0.0598  | -75.41097224 | 0.1727   | -75.56494323 | 0.1073   | -94.2697  | -0.2003  | 3.580 | -94.2697  | -0.2003  |
| -0.0499  | -75.41099495 | 0.1569   | -75.56495675 | 0.0988   | -94.2471  | -0.1777  | 3.680 | -94.2471  | -0.1777  |
| -0.0419  | -75.41101540 | 0.1426   | -75.56496927 | 0.0909   | -94.2276  | -0.1582  | 3.780 | -94.2276  | -0.1582  |
| -0.0353  | -75.41103383 | 0.1298   | -75.56498081 | 0.0837   | -94.2108  | -0.1414  | 3.880 | -94.2108  | -0.1414  |
| -0.0298  | -75.41105045 | 0.1182   | -75.56499134 | 0.0771   | -94.1961  | -0.1267  | 3.980 | -94.1961  | -0.1267  |
| -0.0255  | -75.41106544 | 0.1078   | -75.56500110 | 0.0710   | -94.1833  | -0.1139  | 4.080 | -94.1833  | -0.1139  |
| -0.0219  | -75.41107897 | 0.0984   | -75.56500955 | 0.0657   | -94.1721  | -0.1026  | 4.180 | -94.1721  | -0.1026  |
| -0.0190  | -75.41109118 | 0.0899   | -75.56501784 | 0.0604   | -94.1623  | -0.0929  | 4.280 | -94.1623  | -0.0929  |
| -0.0165  | -75.41110222 | 0.0823   | -75.56502540 | 0.0557   | -94.1537  | -0.0843  | 4.380 | -94.1537  | -0.0843  |
| -0.0144  | -75.41111219 | 0.0753   | -75.56503231 | 0.0514   | -94.1461  | -0.0767  | 4.480 | -94.1461  | -0.0767  |
| -0.0127  | -75.41112120 | 0.0691   | -75.56503861 | 0.0474   | -94.1393  | -0.0699  | 4.580 | -94.1393  | -0.0699  |
| -0.0112  | -75.41112936 | 0.0634   | -75.56504437 | 0.0438   | -94.1333  | -0.0639  | 4.680 | -94.1333  | -0.0639  |
| -0.0099  | -75.41113675 | 0.0583   | -75.56504963 | 0.0405   | -94.1279  | -0.0585  | 4.780 | -94.1279  | -0.0585  |
| -0.0088  | -75.41114345 | 0.0537   | -75.56505443 | 0.0375   | -94.1230  | -0.0536  | 4.880 | -94.1230  | -0.0536  |
| -0.0078  | -75.41114952 | 0.0495   | -75.56505883 | 0.0347   | -94.1187  | -0.0492  | 4.980 | -94.1187  | -0.0492  |

|         |              |        |              |        |          |         |        |          |         |
|---------|--------------|--------|--------------|--------|----------|---------|--------|----------|---------|
| -0.0069 | -75.41115504 | 0.0457 | -75.56506280 | 0.0322 | -94.1147 | -0.0453 | 5.080  | -94.1147 | -0.0453 |
| -0.0061 | -75.41116006 | 0.0422 | -75.56506650 | 0.0299 | -94.1111 | -0.0417 | 5.180  | -94.1111 | -0.0417 |
| -0.0054 | -75.41116463 | 0.0390 | -75.56506988 | 0.0278 | -94.1079 | -0.0385 | 5.280  | -94.1079 | -0.0385 |
| -0.0048 | -75.41116880 | 0.0362 | -75.56507294 | 0.0259 | -94.1050 | -0.0355 | 5.380  | -94.1050 | -0.0355 |
| -0.0043 | -75.41117261 | 0.0336 | -75.56507580 | 0.0241 | -94.1023 | -0.0329 | 5.480  | -94.1023 | -0.0329 |
| -0.0038 | -75.41117609 | 0.0312 | -75.56507843 | 0.0224 | -94.0999 | -0.0304 | 5.580  | -94.0999 | -0.0304 |
| -0.0033 | -75.41117928 | 0.0290 | -75.56508050 | 0.0211 | -94.0975 | -0.0281 | 5.680  | -94.0975 | -0.0281 |
| -0.0030 | -75.41118220 | 0.0270 | -75.56508274 | 0.0197 | -94.0955 | -0.0261 | 5.780  | -94.0955 | -0.0261 |
| -0.0026 | -75.41118488 | 0.0251 | -75.56508480 | 0.0184 | -94.0937 | -0.0242 | 5.880  | -94.0937 | -0.0242 |
| -0.0023 | -75.41118735 | 0.0235 | -75.56508672 | 0.0172 | -94.0920 | -0.0225 | 5.980  | -94.0920 | -0.0225 |
| -0.0020 | -75.41118963 | 0.0219 | -75.56508849 | 0.0161 | -94.0904 | -0.0210 | 6.080  | -94.0904 | -0.0210 |
| -0.0018 | -75.41119173 | 0.0205 | -75.56509013 | 0.0151 | -94.0890 | -0.0196 | 6.180  | -94.0890 | -0.0196 |
| -0.0016 | -75.41119366 | 0.0192 | -75.56509166 | 0.0141 | -94.0877 | -0.0183 | 6.280  | -94.0877 | -0.0183 |
| -0.0014 | -75.41119546 | 0.0180 | -75.56509307 | 0.0132 | -94.0865 | -0.0170 | 6.380  | -94.0865 | -0.0170 |
| -0.0012 | -75.41119712 | 0.0168 | -75.56509439 | 0.0124 | -94.0854 | -0.0159 | 6.480  | -94.0854 | -0.0159 |
| -0.0010 | -75.41119866 | 0.0158 | -75.56509420 | 0.0125 | -94.0840 | -0.0146 | 6.580  | -94.0840 | -0.0146 |
| -0.0009 | -75.41120009 | 0.0148 | -75.56509535 | 0.0118 | -94.0831 | -0.0137 | 6.680  | -94.0831 | -0.0137 |
| -0.0008 | -75.41120141 | 0.0139 | -75.56509643 | 0.0111 | -94.0822 | -0.0128 | 6.780  | -94.0822 | -0.0128 |
| -0.0007 | -75.41120265 | 0.0131 | -75.56509744 | 0.0105 | -94.0814 | -0.0120 | 6.880  | -94.0814 | -0.0120 |
| -0.0006 | -75.41120380 | 0.0123 | -75.56509838 | 0.0099 | -94.0807 | -0.0112 | 6.980  | -94.0807 | -0.0112 |
| -0.0005 | -75.41120487 | 0.0116 | -75.56509926 | 0.0094 | -94.0800 | -0.0106 | 7.080  | -94.0800 | -0.0106 |
| -0.0004 | -75.41120587 | 0.0109 | -75.56510009 | 0.0088 | -94.0793 | -0.0099 | 7.180  | -94.0793 | -0.0099 |
| -0.0004 | -75.41120680 | 0.0103 | -75.56510086 | 0.0084 | -94.0787 | -0.0093 | 7.280  | -94.0787 | -0.0093 |
| -0.0003 | -75.41120767 | 0.0097 | -75.56510159 | 0.0079 | -94.0782 | -0.0088 | 7.380  | -94.0782 | -0.0088 |
| -0.0003 | -75.41120849 | 0.0092 | -75.56510227 | 0.0075 | -94.0777 | -0.0083 | 7.480  | -94.0777 | -0.0083 |
| -0.0002 | -75.41120925 | 0.0086 | -75.56510291 | 0.0071 | -94.0772 | -0.0078 | 7.580  | -94.0772 | -0.0078 |
| -0.0002 | -75.41120996 | 0.0082 | -75.56510351 | 0.0067 | -94.0768 | -0.0074 | 7.680  | -94.0768 | -0.0074 |
| -0.0002 | -75.41121063 | 0.0077 | -75.56510407 | 0.0063 | -94.0764 | -0.0070 | 7.780  | -94.0764 | -0.0070 |
| -0.0002 | -75.41121126 | 0.0073 | -75.56510460 | 0.0060 | -94.0760 | -0.0066 | 7.880  | -94.0760 | -0.0066 |
| -0.0001 | -75.41121185 | 0.0069 | -75.56510510 | 0.0057 | -94.0756 | -0.0062 | 7.980  | -94.0756 | -0.0062 |
| -0.0001 | -75.41121240 | 0.0065 | -75.56510557 | 0.0054 | -94.0753 | -0.0059 | 8.080  | -94.0753 | -0.0059 |
| -0.0001 | -75.41121292 | 0.0062 | -75.56510602 | 0.0051 | -94.0750 | -0.0056 | 8.180  | -94.0750 | -0.0056 |
| -0.0001 | -75.41121340 | 0.0059 | -75.56510643 | 0.0049 | -94.0747 | -0.0053 | 8.280  | -94.0747 | -0.0053 |
| -0.0001 | -75.41121386 | 0.0056 | -75.56510683 | 0.0046 | -94.0744 | -0.0050 | 8.380  | -94.0744 | -0.0050 |
| -0.0001 | -75.41121429 | 0.0053 | -75.56510720 | 0.0044 | -94.0742 | -0.0048 | 8.480  | -94.0742 | -0.0048 |
| 0.0000  | -75.41122227 | 0.0050 | -75.56511417 | 0.0000 | -94.0694 | 0.0000  | 18.752 | -94.0694 | 0.0000  |



N2: RHF, CCSD(T), SCGVB, vCAS and vCASCI ENERGIES

| R(Å)  | E(R=∞)        |           | E(R=∞)        |             | E(R=20.0)     |           | E(R=20.0)                                                                                                     |               | E(R=20.0)     |               | EDCE(R=20.0) |               |                  |
|-------|---------------|-----------|---------------|-------------|---------------|-----------|---------------------------------------------------------------------------------------------------------------|---------------|---------------|---------------|--------------|---------------|------------------|
|       | -108.80045046 |           | -109.05019088 |             | -108.80044983 |           | -108.80044983                                                                                                 |               | -109.03368898 |               | -146.3598    |               |                  |
|       |               |           |               |             | SCGVB         |           | vCAS3: (occ,3,1,1,0,3,1,1,0;closed,2,0,0,0,2,0,0,0) + (occ,3,1,1,0,3,1,1,0;closed,1,0,0,0,1,0,0,0);frozen DCE |               |               |               |              |               |                  |
|       | E(RHF)        | ΔE(RHD)   | E[CCSD(T)]    | ΔE[CCSD(T)] | E(SCGVB)      | ΔE(SCGVB) | E(vCAS1)                                                                                                      | E(vCAS3)      | ΔE(vCAS3)     | E(vCASCI3)    | ΔE(vCASCI3)  | vCASCI3-SCGVB | Δ(vCASCI3-SCGVB) |
| 0.771 |               |           |               |             | -108.39450127 | 254.7366  | -108.43301877                                                                                                 | -108.44125791 | 225.3964      | -108.70331656 | 207.3119     | -193.7846     | -47.4248         |
| 0.781 |               |           |               |             | -108.45431664 | 217.2019  | -108.49334090                                                                                                 | -108.50170944 | 187.4625      | -108.76337041 | 169.6275     | -193.9342     | -47.5744         |
| 0.791 |               |           |               |             | -108.50990047 | 182.3225  | -108.54943475                                                                                                 | -108.55793248 | 152.1820      | -108.81920276 | 134.5922     | -194.0902     | -47.7304         |
| 0.801 |               |           |               |             | -108.56150825 | 149.9381  | -108.60155548                                                                                                 | -108.61018215 | 119.3948      | -108.87106854 | 102.0459     | -194.2521     | -47.8922         |
| 0.811 |               |           |               |             | -108.60938014 | 119.8981  | -108.64994286                                                                                                 | -108.65869822 | 88.9505       | -108.91920740 | 71.8383      | -194.4196     | -48.0598         |
| 0.821 |               |           |               |             | -108.65374190 | 92.0606   | -108.69482228                                                                                                 | -108.70370602 | 60.7077       | -108.96384458 | 43.8280      | -194.5924     | -48.2326         |
| 0.831 |               |           |               |             | -108.69480581 | 66.2926   | -108.73640559                                                                                                 | -108.74541737 | 34.5334       | -109.00519185 | 17.8822      | -194.7702     | -48.4104         |
| 0.841 |               |           |               |             | -108.73277151 | 42.4688   | -108.77489194                                                                                                 | -108.78403141 | 10.3027       | -109.04344832 | -6.1241      | -194.9527     | -48.5929         |
| 0.851 |               |           |               |             | -108.76782674 | 20.4713   | -108.81046862                                                                                                 | -108.81973539 | -12.1019      | -109.07880122 | -28.3084     | -195.1395     | -48.7797         |
| 0.861 |               |           |               |             | -108.80014812 | 0.1893    | -108.84331175                                                                                                 | -108.85270541 | -32.7909      | -109.11142663 | -48.7811     | -195.3303     | -48.9704         |
| 0.871 |               |           |               |             | -108.82990183 | -18.4814  | -108.87358699                                                                                                 | -108.88310708 | -51.8682      | -109.14149021 | -67.6463     | -195.5247     | -49.1649         |
| 0.881 |               |           |               |             | -108.85724421 | -35.6390  | -108.90145019                                                                                                 | -108.91109622 | -69.4317      | -109.16914777 | -85.0017     | -195.7225     | -49.3627         |
| 0.891 |               |           |               |             | -108.88232247 | -51.3759  | -108.92704796                                                                                                 | -108.93681942 | -85.5732      | -109.19454593 | -100.9393    | -195.9232     | -49.5634         |
| 0.901 |               |           |               |             | -108.90527513 | -65.7789  | -108.95051830                                                                                                 | -108.96041463 | -100.3794     | -109.21782266 | -115.5457    | -196.1266     | -49.7668         |
| 0.911 |               |           |               |             | -108.92623263 | -78.9299  | -108.97199106                                                                                                 | -108.98201167 | -113.9318     | -109.23910783 | -128.9023    | -196.3322     | -49.9724         |
| 0.921 |               |           |               |             | -108.94531782 | -90.9061  | -108.99158849                                                                                                 | -109.00173274 | -126.3070     | -109.25852368 | -141.0859    | -196.5397     | -50.1799         |
| 0.941 |               |           |               |             | -108.97832726 | -111.6198 | -109.02561090                                                                                                 | -109.03600040 | -147.8102     | -109.29220097 | -162.2188    | -196.9588     | -50.5990         |
| 0.961 |               |           |               |             | -109.00515086 | -128.4519 | -109.05342789                                                                                                 | -109.06405958 | -165.4176     | -109.31969693 | -179.4727    | -197.3807     | -51.0209         |
| 0.981 |               |           |               |             | -109.02654110 | -141.8744 | -109.07578661                                                                                                 | -109.08665705 | -179.5978     | -109.34175873 | -193.3167    | -197.8021     | -51.4423         |
| 1.001 |               |           |               |             | -109.04316658 | -152.3071 | -109.09335014                                                                                                 | -109.10445547 | -190.7665     | -109.35904949 | -204.1668    | -198.2196     | -51.8598         |
| 1.021 | -108.98717226 | -117.1697 | -109.38704689 | -211.3804   | -109.05562184 | -160.1229 | -109.10670723                                                                                                 | -109.11804309 | -199.2928     | -109.37215795 | -212.3925    | -198.6294     | -52.2696         |
| 1.041 | -108.99267705 | -120.6240 | -109.39649106 | -217.3067   | -109.06443587 | -165.6538 | -109.11638087                                                                                                 | -109.12794240 | -205.5047     | -109.38160702 | -218.3219    | -199.0279     | -52.6681         |
| 1.061 | -108.99485748 | -121.9923 | -109.40273788 | -221.2266   | -109.07007967 | -169.1953 | -109.12283587                                                                                                 | -109.13461763 | -209.6935     | -109.38786135 | -222.2466    | -199.4111     | -53.0512         |
| 1.081 | -108.99412697 | -121.5339 | -109.40619957 | -223.3989   | -109.07297284 | -171.0108 | -109.12648547                                                                                                 | -109.13848138 | -212.1180     | -109.39133388 | -224.4256    | -199.7746     | -53.4148         |
| 1.101 | -108.99085328 | -119.4796 | -109.40724249 | -224.0533   | -109.07348944 | -171.3350 | -109.12769716                                                                                                 | -109.13990051 | -213.0086     | -109.39239170 | -225.0894    | -200.1142     | -53.7544         |
| 1.121 | -108.98536363 | -116.0348 | -109.40619228 | -223.3943   | -109.07196305 | -170.3772 | -109.12679789                                                                                                 | -109.13920121 | -212.5697     | -109.39136117 | -224.4427    | -200.4254     | -54.0656         |
| 1.141 | -108.9794925  | -111.3822 | -109.40333831 | -221.6034   | -109.06869132 | -168.3241 | -109.12407853                                                                                                 | -109.13667358 | -210.9836     | -109.38853240 | -222.6677    | -200.7033     | -54.3435         |
| 1.161 | -108.96886937 | -105.6845 | -109.39893769 | -218.8420   | -109.06393987 | -165.3425 | -109.11979789                                                                                                 | -109.13257561 | -208.4121     | -109.38416328 | -219.9260    | -200.9433     | -54.5835         |
| 1.181 | -108.95835471 | -99.0864  | -109.39321881 | -215.2533   | -109.05794576 | -161.5812 | -109.11418622                                                                                                 | -109.12713668 | -204.9991     | -109.37848295 | -216.3615    | -201.1402     | -54.7804         |
| 1.201 |               |           |               |             | -109.05092057 | -157.1728 | -109.10744837                                                                                                 | -109.12056071 | -200.8727     | -109.37169491 | -212.1020    | -201.2890     | -54.9292         |
| 1.221 |               |           |               |             | -109.04305306 | -152.2359 | -109.09976649                                                                                                 | -109.11302887 | -196.1463     | -109.36397985 | -207.2607    | -201.3846     | -55.0248         |
| 1.241 |               |           |               |             | -109.03451155 | -146.8760 | -109.09130246                                                                                                 | -109.10470205 | -190.9212     | -109.35549788 | -201.9382    | -201.4220     | -55.0622         |
| 1.261 |               |           |               |             | -109.02544594 | -141.1872 | -109.08220009                                                                                                 | -109.09572299 | -185.2867     | -109.34639095 | -196.2235    | -201.3961     | -55.0363         |
| 1.281 |               |           |               |             | -109.01598958 | -135.2533 | -109.07258705                                                                                                 | -109.08621826 | -179.3224     | -109.33678459 | -190.1954    | -201.3019     | -54.9421         |
| 1.301 |               |           |               |             | -109.00626088 | -129.1484 | -109.06257651                                                                                                 | -109.07629992 | -173.0986     | -109.32678974 | -183.9235    | -201.1349     | -54.7751         |
| 1.321 |               |           |               |             | -108.99636468 | -122.9384 | -109.05226877                                                                                                 | -109.06606712 | -166.6774     | -109.31650422 | -177.4693    | -200.8906     | -54.5308         |
| 1.341 |               |           |               |             | -108.98639353 | -116.6815 | -109.04175259                                                                                                 | -109.05560743 | -160.1138     | -109.30601416 | -170.8867    | -200.5650     | -54.2052         |
| 1.361 |               |           |               |             | -108.97642881 | -110.4285 | -109.03110643                                                                                                 | -109.04499812 | -153.4564     | -109.29539524 | -164.2232    | -200.1545     | -53.7947         |
| 1.381 |               |           |               |             | -108.96654163 | -104.2242 | -109.02039957                                                                                                 | -109.03430729 | -146.7478     | -109.28471384 | -157.5205    | -199.6561     | -53.2963         |
| 1.401 |               |           |               |             | -108.95679379 | -98.1073  | -109.00969315                                                                                                 | -109.02359487 | -140.0257     | -109.27402800 | -150.8150    | -199.0675     | -52.7077         |
| 1.421 |               |           |               |             | -108.94723848 | -92.1113  | -108.99904105                                                                                                 | -109.01291354 | -133.3230     | -109.26338841 | -144.1386    | -198.3871     | -52.0273         |
| 1.441 |               |           |               |             | -108.93792098 | -86.2645  | -108.98849071                                                                                                 | -109.00230961 | -126.6689     | -109.25283921 | -137.5189    | -197.6142     | -51.2544         |
| 1.461 |               |           |               |             | -108.92887931 | -80.5907  | -108.97808391                                                                                                 | -108.99182371 | -120.0889     | -109.24241877 | -130.9799    | -196.7490     | -50.3892         |
| 1.481 |               |           |               |             | -108.92014477 | -75.1097  | -108.96785741                                                                                                 | -108.98149157 | -113.6054     | -109.23216035 | -124.5427    | -195.7928     | -49.4330         |
| 1.501 |               |           |               |             | -108.91174248 | -69.8372  | -108.95784353                                                                                                 | -108.97134454 | -107.2381     | -109.22209271 | -118.2251    | -194.7477     | -48.3879         |
| 1.521 |               |           |               |             | -108.90369190 | -64.7854  | -108.94807071                                                                                                 | -108.96141023 | -101.0042     | -109.21224069 | -112.0429    | -193.6173     | -47.2575         |
| 1.541 |               |           |               |             | -108.89600724 | -59.9632  | -108.93856391                                                                                                 | -108.95171295 | -94.9191      | -109.20262566 | -106.0094    | -192.4060     | -46.0462         |
| 1.561 |               |           |               |             | -108.88869800 | -55.3766  | -108.92934506                                                                                                 | -108.94227415 | -88.9961      | -109.19326597 | -100.1361    | -191.1193     | -44.7595         |
| 1.581 |               |           |               |             | -108.88176939 | -51.0288  | -108.92043331                                                                                                 | -108.93311282 | -83.2473      | -109.18417732 | -94.4329     | -189.7639     | -43.4041         |
| 1.601 |               |           |               |             | -108.87522279 | -46.9208  | -108.91184532                                                                                                 | -108.92424577 | -77.6831      | -109.17537303 | -88.9081     | -188.3472     | -41.9874         |
| 1.621 |               |           |               |             | -108.86905618 | -43.0511  | -108.90359542                                                                                                 | -108.91568785 | -72.3130      | -109.16686438 | -83.5688     | -186.8775     | -40.5177         |
| 1.641 |               |           |               |             | -108.86326463 | -39.4169  | -108.89569576                                                                                                 | -108.90745221 | -67.1450      | -109.15866078 | -78.4210     | -185.3639     | -39.0041         |
| 1.661 |               |           |               |             | -108.85784067 | -36.0133  | -108.88815636                                                                                                 | -108.89955033 | -62.1865      | -109.15076992 | -73.4694     | -183.8159     | -37.4561         |
| 1.681 |               |           |               |             | -108.85277478 | -32.8344  | -108.88098510                                                                                                 | -108.89199214 | -57.4437      | -109.14319797 | -68.7179     | -182.2433     | -35.8835         |
| 1.701 |               |           |               |             | -108.84805570 | -29.8731  | -108.87418776                                                                                                 | -108.88478598 | -52.9217      | -109.13594960 | -64.1695     | -180.6562     | -34.2964         |
| 1.721 |               |           |               |             | -108.84367085 | -27.1216  | -108.86776792                                                                                                 | -108.87793855 | -48.6249      | -109.12902801 | -59.8262     | -179.0644     | -32.7046         |
| 1.741 |               |           |               |             | -108.83960663 | -24.5713  | -108.86172694                                                                                                 | -108.87145481 | -44.5563      | -109.12243509 | -55.6890     | -177.4776     | -31.1178         |
| 1.761 |               |           |               |             | -108.83584874 | -22.2132  | -108.85606386                                                                                                 | -108.86533781 | -40.7178      | -109.11617129 | -51.7584     | -175.9051     | -29.5453         |
| 1.781 |               |           |               |             | -108.83238239 | -20.0380  | -108.85077547                                                                                                 | -108.85958858 | -37.1101      | -109.11023568 | -48.0338     | -174.3556     | -27.9958         |
| 1.801 |               |           |               |             | -108.82919254 | -18.0363  | -108.84585619                                                                                                 | -108.85420599 | -33.7325      | -109.10462594 | -44.5136     | -172.8371     | -26.4773         |
| 1.821 |               |           |               |             | -108.82626406 | -16.1987  | -108.84129825                                                                                                 | -108.84918661 | -30.5828      | -109.09933838 | -41.1956     | -171.3568     | -24.9970         |
| 1.841 |               |           |               |             | -108.82358190 | -14.5156  | -108.83709173                                                                                                 | -108.84452467 | -27.6574      | -109.09436786 | -38.0766     | -169.9208     | -23.5610         |
| 1.861 |               |           |               |             | -108.82113118 | -12.9777  | -108.83322475                                                                                                 | -108.84021209 | -24.9512      | -109.08970794 | -35.1524     | -168.5345     | -22.1747         |
| 1.881 |               |           |               |             | -108.81889728 | -11.5760  | -108.82968367                                                                                                 | -108.83623855 | -22.4578      | -109.08535083 | -32.4183     | -167.2022     | -20.8424         |
| 1.901 |               |           |               |             | -108.81686594 | -10.3013  | -108.82645338                                                                                                 | -108.83259170 | -20.1693      | -109.08128749 | -29.8685     | -165.9271     | -19.5673         |

|       |               |         |               |               |          |               |          |           |          |
|-------|---------------|---------|---------------|---------------|----------|---------------|----------|-----------|----------|
| 1.921 | -108.81502329 | -9.1450 | -108.82351760 | -108.82925738 | -18.0770 | -109.07750774 | -27.4967 | -164.7115 | -18.3517 |
| 1.941 | -108.81335591 | -8.0987 | -108.82085912 | -108.82621994 | -16.1710 | -109.07400041 | -25.2958 | -163.5569 | -17.1971 |
| 1.961 | -108.81185088 | -7.1543 | -108.81846021 | -108.82346259 | -14.4407 | -109.07075345 | -23.2583 | -162.4638 | -16.1040 |
| 1.981 | -108.81049577 | -6.3039 | -108.81630284 | -108.82096775 | -12.8752 | -109.06775412 | -21.3762 | -161.4321 | -15.0723 |
| 2.001 | -108.80927871 | -5.5402 | -108.81436899 | -108.81871740 | -11.4631 | -109.06498921 | -19.6412 | -160.4608 | -14.1010 |
| 2.021 | -108.80818840 | -4.8560 | -108.81264091 | -108.81669343 | -10.1930 | -109.06244517 | -18.0448 | -159.5486 | -13.1888 |
| 2.041 | -108.80721410 | -4.2446 | -108.81110131 | -108.81487793 | -9.0538  | -109.06010833 | -16.5784 | -158.6936 | -12.3338 |
| 2.061 | -108.80634567 | -3.6997 | -108.80973356 | -108.81325343 | -8.0344  | -109.05796506 | -15.2335 | -157.8936 | -11.5338 |
| 2.081 | -108.80557358 | -3.2152 | -108.80852180 | -108.81180309 | -7.1243  | -109.05600193 | -14.0016 | -157.1462 | -10.7864 |
| 2.131 | -108.80400762 | -2.2325 | -108.80607890 | -108.80883641 | -5.2627  | -109.05179740 | -11.3632 | -155.4905 | -9.1307  |
| 2.181 | -108.80286598 | -1.5162 | -108.80431249 | -108.80663661 | -3.8823  | -109.04844725 | -9.2610  | -154.1046 | -7.7448  |
| 2.231 | -108.80204730 | -1.0024 | -108.80305342 | -108.80501893 | -2.8672  | -109.04578431 | -7.5899  | -152.9473 | -6.5875  |
| 2.281 | -108.80147036 | -0.6404 | -108.80216840 | -108.80383652 | -2.1252  | -109.04366750 | -6.2616  | -151.9810 | -5.6212  |
| 2.331 | -108.80107155 | -0.3901 | -108.80155513 | -108.80297582 | -1.5851  | -109.04198116 | -5.2034  | -151.1731 | -4.8133  |
| 2.381 | -108.80080198 | -0.2210 | -108.80113675 | -108.80235077 | -1.1929  | -109.04063243 | -4.3571  | -150.4959 | -4.1361  |
| 2.431 | -108.80062476 | -0.1098 | -108.80085647 | -108.80189712 | -0.9082  | -109.03954784 | -3.6765  | -149.9265 | -3.5667  |
| 2.481 | -108.80051245 | -0.0393 | -108.80067284 | -108.80156747 | -0.7013  | -109.03866991 | -3.1256  | -149.4461 | -3.0863  |
| 2.531 | -108.80044495 | 0.0031  | -108.80055600 | -108.80132711 | -0.5505  | -109.03795399 | -2.6763  | -149.0392 | -2.6794  |
| 2.581 | -108.80040770 | 0.0264  | -108.80048463 | -108.80115086 | -0.4399  | -109.03736552 | -2.3071  | -148.6933 | -2.3335  |
| 2.631 | -108.80039034 | 0.0373  | -108.80044364 | -108.80102052 | -0.3581  | -109.03687781 | -2.0010  | -148.3982 | -2.0384  |
| 2.681 | -108.80038555 | 0.0403  | -108.80042250 | -108.80092299 | -0.2969  | -109.03647023 | -1.7453  | -148.1454 | -1.7856  |
| 2.731 | -108.80038832 | 0.0386  | -108.80041394 | -108.80084892 | -0.2504  | -109.03612685 | -1.5298  | -147.9282 | -1.5684  |
| 2.781 | -108.80039523 | 0.0343  | -108.80041300 | -108.80079168 | -0.2145  | -109.03583531 | -1.3468  | -147.7409 | -1.3811  |
| 2.831 | -108.80040406 | 0.0287  | -108.80041639 | -108.80074655 | -0.1862  | -109.03558600 | -1.1904  | -147.5789 | -1.2191  |
| 2.881 | -108.80041341 | 0.0229  | -108.80042196 | -108.80071023 | -0.1634  | -109.03537142 | -1.0557  | -147.4384 | -1.0786  |
| 2.931 | -108.80042244 | 0.0172  | -108.80042838 | -108.80068041 | -0.1447  | -109.03518562 | -0.9392  | -147.3161 | -0.9563  |
| 2.981 | -108.80043072 | 0.0120  | -108.80043483 | -108.80065548 | -0.1290  | -109.03502394 | -0.8377  | -147.2095 | -0.8497  |
| 3.031 | -108.80043803 | 0.0074  | -108.80044089 | -108.80063430 | -0.1158  | -109.03488262 | -0.7490  | -147.1162 | -0.7564  |
| 3.081 | -108.80044434 | 0.0034  | -108.80044632 | -108.80061607 | -0.1043  | -109.03475862 | -0.6712  | -147.0345 | -0.6747  |
| 3.131 | -108.80044967 | 0.0001  | -108.80045105 | -108.80060022 | -0.0944  | -109.03464947 | -0.6027  | -146.9626 | -0.6028  |
| 3.181 | -108.80045411 | -0.0027 | -108.80045506 | -108.80058632 | -0.0856  | -109.03455309 | -0.5422  | -146.8994 | -0.5396  |
| 3.231 | -108.80045774 | -0.0050 | -108.80045840 | -108.80057405 | -0.0779  | -109.03446778 | -0.4887  | -146.8435 | -0.4837  |
| 3.281 | -108.80046065 | -0.0068 | -108.80046111 | -108.80056314 | -0.0711  | -109.03439207 | -0.4412  | -146.7942 | -0.4344  |
| 3.331 | -108.80046291 | -0.0082 | -108.80046323 | -108.80055338 | -0.0650  | -109.03432472 | -0.3989  | -146.7505 | -0.3907  |
| 3.381 | -108.80046462 | -0.0093 | -108.80046484 | -108.80054459 | -0.0595  | -109.03426467 | -0.3613  | -146.7118 | -0.3520  |
| 3.431 | -108.80046581 | -0.0100 | -108.80046597 | -108.80053664 | -0.0545  | -109.03421100 | -0.3276  | -146.6774 | -0.3175  |
| 3.481 | -108.80046656 | -0.0105 | -108.80046667 | -108.80052938 | -0.0499  | -109.03416294 | -0.2974  | -146.6467 | -0.2869  |
| 3.531 | -108.80046692 | -0.0107 | -108.80046699 | -108.80052274 | -0.0458  | -109.03411981 | -0.2703  | -146.6194 | -0.2596  |
| 3.581 | -108.80046693 | -0.0107 | -108.80046698 | -108.80051661 | -0.0419  | -109.03408102 | -0.2460  | -146.5951 | -0.2353  |
| 3.631 | -108.80046665 | -0.0106 | -108.80046669 | -108.80051095 | -0.0384  | -109.03404609 | -0.2241  | -146.5733 | -0.2135  |
| 3.681 | -108.80046614 | -0.0102 | -108.80046616 | -108.80050571 | -0.0351  | -109.03401457 | -0.2043  | -146.5539 | -0.1941  |
| 3.731 | -108.80046543 | -0.0098 | -108.80046545 | -108.80050084 | -0.0320  | -109.03398610 | -0.1864  | -146.5365 | -0.1767  |
| 3.781 | -108.80046458 | -0.0093 | -108.80046459 | -108.80049633 | -0.0292  | -109.03396036 | -0.1703  | -146.5208 | -0.1610  |
| 3.831 | -108.80046363 | -0.0087 | -108.80046364 | -108.80049215 | -0.0266  | -109.03393707 | -0.1557  | -146.5068 | -0.1470  |
| 3.881 | -108.80046263 | -0.0080 | -108.80046263 | -108.80048830 | -0.0241  | -109.03391599 | -0.1425  | -146.4942 | -0.1344  |
| 3.931 | -108.80046161 | -0.0074 | -108.80046161 | -108.80048476 | -0.0219  | -109.03389689 | -0.1305  | -146.4829 | -0.1231  |
| 3.981 | -108.80046060 | -0.0068 | -108.80046061 | -108.80048152 | -0.0199  | -109.03387960 | -0.1196  | -146.4727 | -0.1129  |
| 4.031 | -108.80045964 | -0.0062 | -108.80045964 | -108.80047858 | -0.0180  | -109.03386394 | -0.1098  | -146.4634 | -0.1036  |
| 4.081 | -108.80045874 | -0.0056 | -108.80045874 | -108.80047592 | -0.0164  | -109.03384976 | -0.1009  | -146.4551 | -0.0953  |
| 4.131 | -108.80045791 | -0.0051 | -108.80045791 | -108.80047353 | -0.0149  | -109.03383692 | -0.0928  | -146.4476 | -0.0878  |
| 4.181 | -108.80045718 | -0.0046 | -108.80045718 | -108.80047140 | -0.0135  | -109.03382530 | -0.0855  | -146.4407 | -0.0809  |
| 4.231 | -108.80045653 | -0.0042 | -108.80045653 | -108.80046951 | -0.0123  | -109.03381477 | -0.0789  | -146.4345 | -0.0747  |
| 4.281 | -108.80045598 | -0.0039 | -108.80045598 | -108.80046784 | -0.0113  | -109.03380524 | -0.0730  | -146.4289 | -0.0691  |
| 4.331 | -108.80045551 | -0.0036 | -108.80045551 | -108.80046638 | -0.0104  | -109.03379660 | -0.0675  | -146.4238 | -0.0640  |
| 4.381 | -108.80045513 | -0.0033 | -108.80045513 | -108.80046511 | -0.0096  | -109.03378876 | -0.0626  | -146.4191 | -0.0593  |
| 4.431 | -108.80045482 | -0.0031 | -108.80045482 | -108.80046399 | -0.0089  | -109.03378164 | -0.0581  | -146.4148 | -0.0550  |
| 4.481 | -108.80045457 | -0.0030 | -108.80045457 | -108.80046302 | -0.0083  | -109.03377517 | -0.0541  | -146.4109 | -0.0511  |
| 4.531 | -108.80045438 | -0.0029 | -108.80045438 | -108.80046217 | -0.0077  | -109.03376929 | -0.0504  | -146.4073 | -0.0475  |
| 4.581 | -108.80045423 | -0.0028 | -108.80045423 | -108.80046143 | -0.0073  | -109.03376391 | -0.0470  | -146.4041 | -0.0443  |
| 4.681 | -108.80045401 | -0.0026 | -108.80045401 | -108.80046020 | -0.0065  | -109.03375448 | -0.0411  | -146.3983 | -0.0385  |
| 4.781 | -108.80045386 | -0.0025 | -108.80045386 | -108.80045920 | -0.0059  | -109.03374651 | -0.0361  | -146.3934 | -0.0336  |
| 4.881 | -108.80045372 | -0.0024 | -108.80045372 | -108.80045836 | -0.0054  | -109.03373970 | -0.0318  | -146.3892 | -0.0294  |
| 4.981 | -108.80045356 | -0.0023 | -108.80045356 | -108.80045761 | -0.0049  | -109.03373384 | -0.0282  | -146.3856 | -0.0258  |
| 5.081 | -108.80045337 | -0.0022 | -108.80045337 | -108.80045692 | -0.0044  | -109.03372875 | -0.0250  | -146.3825 | -0.0227  |
| 5.181 | -108.80045315 | -0.0021 | -108.80045315 | -108.80045627 | -0.0040  | -109.03372429 | -0.0222  | -146.3799 | -0.0201  |
| 5.281 | -108.80045289 | -0.0019 | -108.80045289 | -108.80045565 | -0.0037  | -109.03372037 | -0.0197  | -146.3776 | -0.0178  |
| 5.381 | -108.80045261 | -0.0017 | -108.80045261 | -108.80045507 | -0.0033  | -109.03371691 | -0.0175  | -146.3756 | -0.0158  |
| 5.481 | -108.80045233 | -0.0016 | -108.80045233 | -108.80045451 | -0.0029  | -109.03371385 | -0.0156  | -146.3738 | -0.0140  |
| 5.581 | -108.80045204 | -0.0014 | -108.80045204 | -108.80045400 | -0.0026  | -109.03371114 | -0.0139  | -146.3723 | -0.0125  |
| 5.681 | -108.80045177 | -0.0012 | -108.80045177 | -108.80045352 | -0.0023  | -109.03370874 | -0.0124  | -146.3710 | -0.0112  |
| 5.781 | -108.80045151 | -0.0011 | -108.80045151 | -108.80045308 | -0.0020  | -109.03370661 | -0.0111  | -146.3698 | -0.0100  |
| 5.881 | -108.80045127 | -0.0009 | -108.80045127 | -108.80045268 | -0.0018  | -109.03370472 | -0.0099  | -146.3688 | -0.0090  |
| 5.981 | -108.80045105 | -0.0008 | -108.80045105 | -108.80045233 | -0.0016  | -109.03370304 | -0.0088  | -146.3679 | -0.0081  |
| 6.081 | -108.80045086 | -0.0006 | -108.80045086 | -108.80045201 | -0.0014  | -109.03370156 | -0.0079  | -146.3671 | -0.0072  |

|        |  |               |         |               |               |         |               |         |           |         |
|--------|--|---------------|---------|---------------|---------------|---------|---------------|---------|-----------|---------|
| 6.181  |  | -108.80045069 | -0.0005 | -108.80045069 | -108.80045173 | -0.0012 | -109.03370024 | -0.0071 | -146.3663 | -0.0065 |
| 6.281  |  | -108.80045054 | -0.0004 | -108.80045054 | -108.80045149 | -0.0010 | -109.03369907 | -0.0063 | -146.3657 | -0.0059 |
| 6.381  |  | -108.80045041 | -0.0004 | -108.80045041 | -108.80045127 | -0.0009 | -109.03369804 | -0.0057 | -146.3651 | -0.0053 |
| 6.481  |  | -108.80045030 | -0.0003 | -108.80045030 | -108.80045109 | -0.0008 | -109.03369712 | -0.0051 | -146.3646 | -0.0048 |
| 6.581  |  | -108.80045021 | -0.0002 | -108.80045021 | -108.80045093 | -0.0007 | -109.03369630 | -0.0046 | -146.3642 | -0.0044 |
| 6.681  |  | -108.80045014 | -0.0002 | -108.80045014 | -108.80045079 | -0.0006 | -109.03369557 | -0.0041 | -146.3637 | -0.0039 |
| 6.781  |  | -108.80045008 | -0.0002 | -108.80045007 | -108.80045067 | -0.0005 | -109.03369492 | -0.0037 | -146.3634 | -0.0036 |
| 6.881  |  | -108.80045002 | -0.0001 | -108.80045002 | -108.80045057 | -0.0005 | -109.03369435 | -0.0034 | -146.3631 | -0.0033 |
| 6.981  |  | -108.80044998 | -0.0001 | -108.80044998 | -108.80045048 | -0.0004 | -109.03369383 | -0.0030 | -146.3628 | -0.0029 |
| 7.081  |  | -108.80044995 | -0.0001 | -108.80044995 | -108.80045041 | -0.0004 | -109.03369337 | -0.0028 | -146.3625 | -0.0027 |
| 7.181  |  | -108.80044992 | -0.0001 | -108.80044992 | -108.80045034 | -0.0003 | -109.03369296 | -0.0025 | -146.3622 | -0.0024 |
| 7.281  |  | -108.80044990 | 0.0000  | -108.80044990 | -108.80045029 | -0.0003 | -109.03369260 | -0.0023 | -146.3620 | -0.0022 |
| 7.381  |  | -108.80044988 | 0.0000  | -108.80044988 | -108.80045024 | -0.0003 | -109.03369227 | -0.0021 | -146.3618 | -0.0020 |
| 7.481  |  | -108.80044987 | 0.0000  | -108.80044987 | -108.80045020 | -0.0002 | -109.03369197 | -0.0019 | -146.3617 | -0.0019 |
| 7.581  |  | -108.80044986 | 0.0000  | -108.80044986 | -108.80045016 | -0.0002 | -109.03369171 | -0.0017 | -146.3615 | -0.0017 |
| 7.681  |  | -108.80044985 | 0.0000  | -108.80044985 | -108.80045013 | -0.0002 | -109.03369147 | -0.0016 | -146.3614 | -0.0015 |
| 7.781  |  | -108.80044984 | 0.0000  | -108.80044984 | -108.80045011 | -0.0002 | -109.03369126 | -0.0014 | -146.3612 | -0.0014 |
| 7.881  |  | -108.80044984 | 0.0000  | -108.80044984 | -108.80045008 | -0.0002 | -109.03369107 | -0.0013 | -146.3611 | -0.0013 |
| 7.981  |  | -108.80044984 | 0.0000  | -108.80044984 | -108.80045006 | -0.0001 | -109.03369089 | -0.0012 | -146.3610 | -0.0012 |
| 8.081  |  | -108.80044983 | 0.0000  | -108.80044983 | -108.80045004 | -0.0001 | -109.03369074 | -0.0011 | -146.3609 | -0.0011 |
| 8.181  |  | -108.80044983 | 0.0000  | -108.80044983 | -108.80045003 | -0.0001 | -109.03369060 | -0.0010 | -146.3608 | -0.0010 |
| 8.281  |  | -108.80044983 | 0.0000  | -108.80044983 | -108.80045001 | -0.0001 | -109.03369047 | -0.0009 | -146.3607 | -0.0009 |
| 8.381  |  | -108.80044983 | 0.0000  | -108.80044983 | -108.80045000 | -0.0001 | -109.03369035 | -0.0009 | -146.3607 | -0.0009 |
| 8.481  |  | -108.80044983 | 0.0000  | -108.80044983 | -108.80044999 | -0.0001 | -109.03369024 | -0.0008 | -146.3606 | -0.0008 |
| 8.581  |  | -108.80044983 | 0.0000  | -108.80044983 | -108.80044998 | -0.0001 | -109.03369015 | -0.0007 | -146.3605 | -0.0007 |
| 8.681  |  | -108.80044983 | 0.0000  | -108.80044983 | -108.80044997 | -0.0001 | -109.03369006 | -0.0007 | -146.3605 | -0.0007 |
| 8.781  |  | -108.80044983 | 0.0000  | -108.80044983 | -108.80044996 | -0.0001 | -109.03368998 | -0.0006 | -146.3604 | -0.0006 |
| 8.881  |  | -108.80044983 | 0.0000  | -108.80044983 | -108.80044995 | -0.0001 | -109.03368991 | -0.0006 | -146.3604 | -0.0006 |
| 8.981  |  | -108.80044983 | 0.0000  | -108.80044983 | -108.80044994 | -0.0001 | -109.03368984 | -0.0005 | -146.3603 | -0.0005 |
| 9.081  |  | -108.80044983 | 0.0000  | -108.80044983 | -108.80044993 | -0.0001 | -109.03368978 | -0.0005 | -146.3603 | -0.0005 |
| 9.181  |  | -108.80044983 | 0.0000  | -108.80044983 | -108.80044993 | -0.0001 | -109.03368975 | -0.0005 | -146.3603 | -0.0005 |
| 9.281  |  | -108.80044983 | 0.0000  | -108.80044983 | -108.80044992 | -0.0001 | -109.03368969 | -0.0004 | -146.3603 | -0.0004 |
| 9.381  |  | -108.80044983 | 0.0000  | -108.80044983 | -108.80044991 | -0.0001 | -109.03368965 | -0.0004 | -146.3602 | -0.0004 |
| 9.481  |  | -108.80044983 | 0.0000  | -108.80044983 | -108.80044991 | -0.0001 | -109.03368960 | -0.0004 | -146.3602 | -0.0004 |
| 9.581  |  | -108.80044983 | 0.0000  | -108.80044983 | -108.80044990 | 0.0000  | -109.03368956 | -0.0004 | -146.3602 | -0.0004 |
| 20.000 |  | -108.80044983 | 0.0000  | -108.80044983 | -108.80044983 | 0.0000  | -109.03368898 | 0.0000  | -146.3598 | 0.0000  |

| Re               |               |                         |
|------------------|---------------|-------------------------|
| 1.101            |               |                         |
| DCF (Re-shifted) |               |                         |
| $\Delta R$       | vCASC13-SCGVB | $\Delta(vCASC13-SCGVB)$ |
| -0.330           | -193.7846     | -47.4248                |
| -0.320           | -193.9342     | -47.5744                |
| -0.310           | -194.0902     | -47.7304                |
| -0.300           | -194.2521     | -47.8922                |
| -0.290           | -194.4196     | -48.0598                |
| -0.280           | -194.5924     | -48.2326                |
| -0.270           | -194.7702     | -48.4104                |
| -0.260           | -194.9527     | -48.5929                |
| -0.250           | -195.1395     | -48.7797                |
| -0.240           | -195.3303     | -48.9704                |
| -0.230           | -195.5247     | -49.1649                |
| -0.220           | -195.7225     | -49.3627                |
| -0.210           | -195.9232     | -49.5634                |
| -0.200           | -196.1266     | -49.7668                |
| -0.190           | -196.3322     | -49.9724                |
| -0.180           | -196.5397     | -50.1799                |
| -0.160           | -196.9588     | -50.5990                |
| -0.140           | -197.3807     | -51.0209                |
| -0.120           | -197.8021     | -51.4423                |
| -0.100           | -198.2196     | -51.8598                |
| -0.080           | -198.6294     | -52.2696                |
| -0.060           | -199.0279     | -52.6681                |
| -0.040           | -199.4111     | -53.0512                |
| -0.020           | -199.7746     | -53.4148                |
| 0.000            | -200.1142     | -53.7544                |
| 0.020            | -200.4254     | -54.0656                |
| 0.040            | -200.7033     | -54.3435                |
| 0.060            | -200.9433     | -54.5835                |
| 0.080            | -201.1402     | -54.7804                |
| 0.100            | -201.2890     | -54.9292                |
| 0.120            | -201.3846     | -55.0248                |
| 0.140            | -201.4220     | -55.0622                |
| 0.160            | -201.3961     | -55.0363                |
| 0.180            | -201.3019     | -54.9421                |
| 0.200            | -201.1349     | -54.7751                |
| 0.220            | -200.8906     | -54.5308                |
| 0.240            | -200.5650     | -54.2052                |
| 0.260            | -200.1545     | -53.7947                |
| 0.280            | -199.6561     | -53.2963                |
| 0.300            | -199.0675     | -52.7077                |
| 0.320            | -198.3871     | -52.0273                |
| 0.340            | -197.6142     | -51.2544                |
| 0.360            | -196.7490     | -50.3892                |
| 0.380            | -195.7928     | -49.4330                |
| 0.400            | -194.7477     | -48.3879                |
| 0.420            | -193.6173     | -47.2575                |
| 0.440            | -192.4060     | -46.0462                |
| 0.460            | -191.1193     | -44.7595                |
| 0.480            | -189.7639     | -43.4041                |
| 0.500            | -188.3472     | -41.9874                |
| 0.520            | -186.8775     | -40.5177                |
| 0.540            | -185.3639     | -39.0041                |
| 0.560            | -183.8159     | -37.4561                |
| 0.580            | -182.2433     | -35.8835                |
| 0.600            | -180.6562     | -34.2964                |
| 0.620            | -179.0644     | -32.7046                |
| 0.640            | -177.4776     | -31.1178                |
| 0.660            | -175.9051     | -29.5453                |
| 0.680            | -174.3556     | -27.9958                |
| 0.700            | -172.8371     | -26.4773                |
| 0.720            | -171.3568     | -24.9970                |
| 0.740            | -169.9208     | -23.5610                |
| 0.760            | -168.5345     | -22.1747                |
| 0.780            | -167.2022     | -20.8424                |
| 0.800            | -165.9271     | -19.5673                |

|       |           |          |
|-------|-----------|----------|
| 0.820 | -164.7115 | -18.3517 |
| 0.840 | -163.5569 | -17.1971 |
| 0.860 | -162.4638 | -16.1040 |
| 0.880 | -161.4321 | -15.0723 |
| 0.900 | -160.4608 | -14.1010 |
| 0.920 | -159.5486 | -13.1888 |
| 0.940 | -158.6936 | -12.3338 |
| 0.960 | -157.8936 | -11.5338 |
| 0.980 | -157.1462 | -10.7864 |
| 1.030 | -155.4905 | -9.1307  |
| 1.080 | -154.1046 | -7.7448  |
| 1.130 | -152.9473 | -6.5875  |
| 1.180 | -151.9810 | -5.6212  |
| 1.230 | -151.1731 | -4.8133  |
| 1.280 | -150.4959 | -4.1361  |
| 1.330 | -149.9265 | -3.5667  |
| 1.380 | -149.4461 | -3.0863  |
| 1.430 | -149.0392 | -2.6794  |
| 1.480 | -148.6933 | -2.3335  |
| 1.530 | -148.3982 | -2.0384  |
| 1.580 | -148.1454 | -1.7856  |
| 1.630 | -147.9282 | -1.5684  |
| 1.680 | -147.7409 | -1.3811  |
| 1.730 | -147.5789 | -1.2191  |
| 1.780 | -147.4384 | -1.0786  |
| 1.830 | -147.3161 | -0.9563  |
| 1.880 | -147.2095 | -0.8497  |
| 1.930 | -147.1162 | -0.7564  |
| 1.980 | -147.0345 | -0.6747  |
| 2.030 | -146.9626 | -0.6028  |
| 2.080 | -146.8994 | -0.5396  |
| 2.130 | -146.8435 | -0.4837  |
| 2.180 | -146.7942 | -0.4344  |
| 2.230 | -146.7505 | -0.3907  |
| 2.280 | -146.7118 | -0.3520  |
| 2.330 | -146.6774 | -0.3175  |
| 2.380 | -146.6467 | -0.2869  |
| 2.430 | -146.6194 | -0.2596  |
| 2.480 | -146.5951 | -0.2353  |
| 2.530 | -146.5733 | -0.2135  |
| 2.580 | -146.5539 | -0.1941  |
| 2.630 | -146.5365 | -0.1767  |
| 2.680 | -146.5208 | -0.1610  |
| 2.730 | -146.5068 | -0.1470  |
| 2.780 | -146.4942 | -0.1344  |
| 2.830 | -146.4829 | -0.1231  |
| 2.880 | -146.4727 | -0.1129  |
| 2.930 | -146.4634 | -0.1036  |
| 2.980 | -146.4551 | -0.0953  |
| 3.030 | -146.4476 | -0.0878  |
| 3.080 | -146.4407 | -0.0809  |
| 3.130 | -146.4345 | -0.0747  |
| 3.180 | -146.4289 | -0.0691  |
| 3.230 | -146.4238 | -0.0640  |
| 3.280 | -146.4191 | -0.0593  |
| 3.330 | -146.4148 | -0.0550  |
| 3.380 | -146.4109 | -0.0511  |
| 3.430 | -146.4073 | -0.0475  |
| 3.480 | -146.4041 | -0.0443  |
| 3.580 | -146.3983 | -0.0385  |
| 3.680 | -146.3934 | -0.0336  |
| 3.780 | -146.3892 | -0.0294  |
| 3.880 | -146.3856 | -0.0258  |
| 3.980 | -146.3825 | -0.0227  |
| 4.080 | -146.3799 | -0.0201  |
| 4.180 | -146.3776 | -0.0178  |
| 4.280 | -146.3756 | -0.0158  |
| 4.380 | -146.3738 | -0.0140  |
| 4.480 | -146.3723 | -0.0125  |
| 4.580 | -146.3710 | -0.0112  |
| 4.680 | -146.3698 | -0.0100  |
| 4.780 | -146.3688 | -0.0090  |
| 4.880 | -146.3679 | -0.0081  |
| 4.980 | -146.3671 | -0.0072  |

|        |           |         |
|--------|-----------|---------|
| 5.080  | -146.3663 | -0.0065 |
| 5.180  | -146.3657 | -0.0059 |
| 5.280  | -146.3651 | -0.0053 |
| 5.380  | -146.3646 | -0.0048 |
| 5.480  | -146.3642 | -0.0044 |
| 5.580  | -146.3637 | -0.0039 |
| 5.680  | -146.3634 | -0.0036 |
| 5.780  | -146.3631 | -0.0033 |
| 5.880  | -146.3628 | -0.0029 |
| 5.980  | -146.3625 | -0.0027 |
| 6.080  | -146.3622 | -0.0024 |
| 6.180  | -146.3620 | -0.0022 |
| 6.280  | -146.3618 | -0.0020 |
| 6.380  | -146.3617 | -0.0019 |
| 6.480  | -146.3615 | -0.0017 |
| 6.580  | -146.3614 | -0.0015 |
| 6.680  | -146.3612 | -0.0014 |
| 6.780  | -146.3611 | -0.0013 |
| 6.880  | -146.3610 | -0.0012 |
| 6.980  | -146.3609 | -0.0011 |
| 7.080  | -146.3608 | -0.0010 |
| 7.180  | -146.3607 | -0.0009 |
| 7.280  | -146.3607 | -0.0009 |
| 7.380  | -146.3606 | -0.0008 |
| 7.480  | -146.3605 | -0.0007 |
| 7.580  | -146.3605 | -0.0007 |
| 7.680  | -146.3604 | -0.0006 |
| 7.780  | -146.3604 | -0.0006 |
| 7.880  | -146.3603 | -0.0005 |
| 7.980  | -146.3603 | -0.0005 |
| 8.080  | -146.3603 | -0.0005 |
| 8.180  | -146.3603 | -0.0004 |
| 8.280  | -146.3602 | -0.0004 |
| 8.380  | -146.3602 | -0.0004 |
| 8.480  | -146.3602 | -0.0004 |
| 18.899 | -146.3598 | 0.0000  |

O2: RHF, CCSD(T), SCGVb, vCAS and vCASCI ENERGIES

| R(Å)  | E(R=∞)        |          | E(R=∞)        |             | E(R=20.0)     |              | E(R=20.0)                                                                                                      |               | E(R=20.0)     |               | DCE(R=20.0)   |             |                  |                     |
|-------|---------------|----------|---------------|-------------|---------------|--------------|----------------------------------------------------------------------------------------------------------------|---------------|---------------|---------------|---------------|-------------|------------------|---------------------|
|       | -149.622129   |          | -149.989862   |             | -149.62064662 |              | -149.61795785                                                                                                  |               | -149.61795785 |               | -149.96151730 |             | -213.8996        |                     |
|       | E(RHF)        | ΔE(RHF)  | E[CCSD(T)]    | ΔE[CCSD(T)] | SCGVb(2)      | ΔE(SCGVb(2)) | vCAS3: (occ,3,1,1,0,3,1,1,0;closed,2,0,0,0,2,0,0,0) + (occ,3,1,1,0,3,1,1,0;closed,1,0,0,0,1,0,0,0,0;frozen DCE | E(vCAS1)      | E(vCAS3)      | ΔE(vCAS3)     | E(vCASCI3)    | ΔE(vCASCI3) | vCASCI3-SCGVb(2) | Δ(vCASCI3-SCGVb(2)) |
| 0.878 |               |          |               |             | -149.37175037 | 156.1848     | -149.38903752                                                                                                  | -149.39206207 | 141.7518      | -149.77813742 | 115.0726      | -255.0118   | -41.1122         |                     |
| 0.888 |               |          |               |             | -149.40392739 | 135.9934     | -149.42173495                                                                                                  | -149.42483663 | 121.1854      | -149.81059877 | 94.7028       | -255.1902   | -41.2906         |                     |
| 0.898 |               |          |               |             | -149.43378197 | 117.2594     | -149.45211516                                                                                                  | -149.45529389 | 102.0732      | -149.84074703 | 75.7845       | -255.3745   | -41.4749         |                     |
| 0.908 |               |          |               |             | -149.46145580 | 99.8938      | -149.48031959                                                                                                  | -149.48357530 | 84.3263       | -149.86872364 | 58.2289       | -255.5645   | -41.6649         |                     |
| 0.918 |               |          |               |             | -149.48708211 | 83.8130      | -149.50648124                                                                                                  | -149.50981379 | 67.8614       | -149.89466152 | 41.9526       | -255.7600   | -41.8604         |                     |
| 0.928 |               |          |               |             | -149.51078623 | 68.9384      | -149.53072510                                                                                                  | -149.53413434 | 52.6001       | -149.91868560 | 26.8773       | -255.9608   | -42.0611         |                     |
| 0.938 |               |          |               |             | -149.53268604 | 55.1961      | -149.55316874                                                                                                  | -149.55665444 | 38.4685       | -149.94091334 | 12.9292       | -256.1665   | -42.2669         |                     |
| 0.948 |               |          |               |             | -149.55289249 | 42.5164      | -149.57392268                                                                                                  | -149.57748459 | 25.3974       | -149.96145518 | 0.0390        | -256.3770   | -42.4774         |                     |
| 0.958 |               |          |               |             | -149.57150996 | 30.8337      | -149.59309088                                                                                                  | -149.59672871 | 13.3215       | -149.98041498 | -11.8585      | -256.5918   | -42.6922         |                     |
| 0.968 |               |          |               |             | -149.58863673 | 20.0865      | -149.61077113                                                                                                  | -149.61448452 | 2.1795        | -149.99789043 | -22.8245      | -256.8106   | -42.9110         |                     |
| 0.978 |               |          |               |             | -149.60436532 | 10.2167      | -149.62705544                                                                                                  | -149.63084398 | -0.8062       | -150.01397342 | -32.9167      | -257.0330   | -43.1334         |                     |
| 0.988 |               |          |               |             | -149.61878285 | 1.1695       | -149.64203033                                                                                                  | -149.64589357 | -17.5299      | -150.02875038 | -42.1894      | -257.2586   | -43.3589         |                     |
| 0.998 |               |          |               |             | -149.63197137 | -7.1064      | -149.65577725                                                                                                  | -149.65971466 | -26.2028      | -150.04230265 | -50.6936      | -257.4868   | -43.5872         |                     |
| 1.008 |               |          |               |             | -149.64400818 | -14.6596     | -149.66837282                                                                                                  | -149.67238382 | -34.1528      | -150.05470673 | -58.4773      | -257.7173   | -43.8177         |                     |
| 1.018 |               |          |               |             | -149.65496608 | -21.5358     | -149.67988914                                                                                                  | -149.68397309 | -41.4252      | -150.06630463 | -65.5856      | -257.9495   | -44.0498         |                     |
| 1.028 |               |          |               |             | -149.66491370 | -27.7780     | -149.69039406                                                                                                  | -149.69455026 | -48.0625      | -150.07635410 | -72.0612      | -258.1828   | -44.2832         |                     |
| 1.048 |               |          |               |             | -149.68203300 | -38.5205     | -149.70862134                                                                                                  | -149.71291967 | -59.5895      | -150.09421894 | -83.2716      | -258.6506   | -44.7510         |                     |
| 1.068 |               |          |               |             | -149.69584000 | -47.1846     | -149.72352161                                                                                                  | -149.72795848 | -69.0265      | -150.10876735 | -92.4008      | -259.1159   | -45.2163         |                     |
| 1.088 |               |          |               |             | -149.70675586 | -54.0344     | -149.73550831                                                                                                  | -149.74007960 | -76.6326      | -150.12041194 | -99.7079      | -259.5732   | -45.6735         |                     |
| 1.108 |               |          |               |             | -149.71515486 | -59.3048     | -149.74494746                                                                                                  | -149.74964850 | -82.6371      | -150.12951782 | -105.4219     | -260.0167   | -46.1171         |                     |
| 1.128 | -149.66977248 | -29.8968 | -150.16724180 | -111.3076   | -149.72136971 | -63.2047     | -149.75216293                                                                                                  | -149.75698854 | -87.2431      | -150.13640793 | -109.7455     | -260.4405   | -46.5408         |                     |
| 1.148 | -149.67095500 | -30.6388 | -150.17225230 | -114.4517   | -149.72569610 | -65.9196     | -149.75744120                                                                                                  | -149.76238563 | -90.6298      | -150.14136775 | -112.8579     | -260.8380   | -46.9383         |                     |
| 1.168 | -149.67035667 | -30.2634 | -150.17556971 | -116.5334   | -149.72839673 | -67.6142     | -149.76103553                                                                                                  | -149.76609250 | -92.9559      | -150.14464943 | -114.9172     | -261.2026   | -47.3029         |                     |
| 1.188 | -149.66820491 | -28.9131 | -150.17741541 | -117.6916   | -149.72970484 | -68.4351     | -149.76316965                                                                                                  | -149.76833237 | -94.3615      | -150.14647551 | -116.0631     | -261.5276   | -47.6280         |                     |
| 1.208 | -149.66470122 | -26.7145 | -150.17798454 | -118.0487   | -149.72982736 | -68.5120     | -149.76404115                                                                                                  | -149.76930230 | -94.9701      | -150.14704225 | -116.4187     | -261.8063   | -47.9067         |                     |
| 1.228 | -149.66002409 | -23.7796 | -150.17744893 | -117.7126   | -149.72894765 | -67.9599     | -149.76382439                                                                                                  | -149.76917612 | -94.8909      | -150.14652257 | -116.0926     | -262.0323   | -48.1326         |                     |
| 1.248 | -149.65433160 | -20.2075 | -150.17595976 | -116.7782   | -149.72722791 | -66.8808     | -149.76267320                                                                                                  | -149.76810719 | -94.2202      | -150.14506874 | -115.1803     | -262.1991   | -48.2995         |                     |
| 1.268 | -149.64776371 | -16.0861 | -150.17364993 | -115.3287   | -149.72481143 | -65.3644     | -149.76072322                                                                                                  | -149.76623066 | -93.0426      | -150.14281473 | -113.7659     | -262.3011   | -48.4015         |                     |
| 1.288 | -149.64044429 | -11.4931 | -150.17063563 | -113.4372   | -149.72182447 | -63.4901     | -149.75809409                                                                                                  | -149.76366573 | -91.4331      | -150.13987837 | -111.9233     | -262.3328   | -48.4332         |                     |
| 1.308 |               |          |               |             | -149.71837802 | -61.3274     | -149.75489131                                                                                                  | -149.76051747 | -89.4575      | -150.13636326 | -109.7175     | -262.2898   | -48.3901         |                     |
| 1.328 |               |          |               |             | -149.71456943 | -58.9375     | -149.75120796                                                                                                  | -149.75687857 | -87.1741      | -150.13236049 | -107.2057     | -262.1679   | -48.2683         |                     |
| 1.348 |               |          |               |             | -149.71048377 | -56.3737     | -149.74712618                                                                                                  | -149.75283082 | -84.6341      | -150.12795018 | -104.4382     | -261.9642   | -48.0646         |                     |
| 1.368 |               |          |               |             | -149.70619514 | -53.6825     | -149.74271855                                                                                                  | -149.74844649 | -81.8829      | -150.12320280 | -101.4592     | -261.6763   | -47.7767         |                     |
| 1.388 |               |          |               |             | -149.70176789 | -50.9044     | -149.73804924                                                                                                  | -149.74378950 | -78.9606      | -150.11818043 | -98.3076      | -261.3029   | -47.4032         |                     |
| 1.408 |               |          |               |             | -149.69725760 | -48.0741     | -149.73317507                                                                                                  | -149.73891645 | -75.9027      | -150.11293778 | -95.0178      | -260.8433   | -46.9437         |                     |
| 1.428 |               |          |               |             | -149.69271211 | -45.2218     | -149.72814637                                                                                                  | -149.73387752 | -72.7407      | -150.10752313 | -91.6201      | -260.2979   | -46.3983         |                     |
| 1.448 |               |          |               |             | -149.68817235 | -42.3730     | -149.72300785                                                                                                  | -149.72871733 | -69.5026      | -150.10197918 | -88.1412      | -259.6678   | -45.7681         |                     |
| 1.468 |               |          |               |             | -149.68367312 | -39.5497     | -149.71779923                                                                                                  | -149.72347554 | -66.2134      | -150.09634371 | -84.6049      | -258.9548   | -45.0551         |                     |
| 1.488 |               |          |               |             | -149.67924382 | -36.7703     | -149.71255588                                                                                                  | -149.71818753 | -62.8951      | -150.09065026 | -81.0322      | -258.1615   | -44.2619         |                     |
| 1.508 |               |          |               |             | -149.67490909 | -34.0502     | -149.70730933                                                                                                  | -149.71288490 | -59.5676      | -150.08492864 | -77.4418      | -257.2912   | -43.3916         |                     |
| 1.528 |               |          |               |             | -149.67068938 | -31.4023     | -149.70208772                                                                                                  | -149.70759590 | -56.2487      | -150.07920539 | -73.8504      | -256.3477   | -42.4481         |                     |
| 1.548 |               |          |               |             | -149.66660148 | -28.8371     | -149.69691620                                                                                                  | -149.70234584 | -52.9543      | -150.07350422 | -70.2729      | -255.3354   | -41.4358         |                     |
| 1.568 |               |          |               |             | -149.66265900 | -26.3632     | -149.69181727                                                                                                  | -149.69715746 | -49.6985      | -150.06784633 | -66.7225      | -254.2589   | -40.3593         |                     |
| 1.588 |               |          |               |             | -149.65887276 | -23.9873     | -149.68681109                                                                                                  | -149.69205117 | -46.4943      | -150.06225073 | -63.2112      | -253.1235   | -39.2239         |                     |
| 1.608 |               |          |               |             | -149.65525121 | -21.7147     | -149.68191572                                                                                                  | -149.68704535 | -43.3531      | -150.05673456 | -59.7497      | -251.9347   | -38.0350         |                     |
| 1.628 |               |          |               |             | -149.65180072 | -19.5495     | -149.67714737                                                                                                  | -149.68215655 | -40.2853      | -150.05131317 | -56.3478      | -250.6979   | -36.7983         |                     |
| 1.648 |               |          |               |             | -149.64852590 | -17.4945     | -149.67252054                                                                                                  | -149.67739969 | -37.3003      | -150.04600051 | -53.0140      | -249.4191   | -35.5195         |                     |
| 1.668 |               |          |               |             | -149.64542982 | -15.5517     | -149.66804824                                                                                                  | -149.67278823 | -34.4066      | -150.04080918 | -49.7564      | -248.1043   | -34.2047         |                     |
| 1.688 |               |          |               |             | -149.64251424 | -13.7221     | -149.66374207                                                                                                  | -149.66833430 | -31.6117      | -150.03575061 | -46.5821      | -246.7596   | -32.8600         |                     |
| 1.708 |               |          |               |             | -149.63977976 | -12.0062     | -149.65961238                                                                                                  | -149.66404878 | -28.9225      | -150.03083522 | -43.4977      | -245.3911   | -31.4914         |                     |
| 1.728 |               |          |               |             | -149.63722593 | -10.4037     | -149.65566829                                                                                                  | -149.65994145 | -26.3451      | -150.02607248 | -40.5090      | -244.0049   | -30.1053         |                     |
| 1.748 |               |          |               |             | -149.63485142 | -8.9136      | -149.65191776                                                                                                  | -149.65602097 | -23.8850      | -150.02147102 | -37.6215      | -242.6075   | -28.7079         |                     |
| 1.768 |               |          |               |             | -149.63265399 | -7.5347      | -149.64836762                                                                                                  | -149.65229494 | -21.5469      | -150.01703868 | -34.8402      | -241.2051   | -27.3055         |                     |
| 1.788 |               |          |               |             | -149.63063063 | -6.2651      | -149.64502353                                                                                                  | -149.64876991 | -19.3349      | -150.01278262 | -32.1695      | -239.8040   | -25.9044         |                     |
| 1.808 |               |          |               |             | -149.62877751 | -5.1022      | -149.64188994                                                                                                  | -149.64545128 | -17.2524      | -150.00870924 | -29.6134      | -238.4108   | -24.5112         |                     |
| 1.828 |               |          |               |             | -149.62709004 | -4.0433      | -149.63897003                                                                                                  | -149.64234331 | -15.3021      | -150.00482437 | -27.1756      | -237.0319   | -23.1323         |                     |
| 1.848 |               |          |               |             | -149.62556286 | -3.0850      | -149.63626557                                                                                                  | -149.63944893 | -13.4859      | -150.00113306 | -24.8593      | -235.6739   | -21.7743         |                     |
| 1.868 |               |          |               |             | -149.62418988 | -2.2234      | -149.63377683                                                                                                  | -149.63676968 | -11.8046      | -149.99763964 | -22.6671      | -234.3433   | -20.4437         |                     |
| 1.888 |               |          |               |             | -149.62296425 | -1.4543      | -149.63150241                                                                                                  | -149.63430553 | -10.2583      | -149.99434764 | -20.6014      | -233.0466   | -19.1470         |                     |
| 1.908 |               |          |               |             | -149.62187848 | -0.7730      | -149.62943917                                                                                                  | -149.63205474 | -8.8459       | -149.99125968 | -18.6636      | -231.7902   | -17.8906         |                     |
| 1.928 |               |          |               |             | -149.62092443 | -0.1743      | -149.62758213                                                                                                  | -149.63001376 | -7.5652       | -149.98837730 | -16.8549      | -230.5802   | -16.6806         |                     |
| 1.948 |               |          |               |             | -149.62009370 | 0.3470       | -149.62592442                                                                                                  | -149.62817714 | -6.4127       | -149.98570083 | -15.1754      | -229.4220   | -15.5224         |                     |
| 1.968 |               |          |               |             | -149.61988585 | 0.4774       | -149.62445736                                                                                                  | -149.62653755 | -5.3838       | -149.98322915 | -13.6244      | -228.0014   | -14.1018         |                     |
| 1.988 |               |          |               |             | -149.61909646 | 0.9727       | -149.62317064                                                                                                  | -149.62508585 | -4.4729       | -149.98095959 | -12.2002      | -227.0726   | -13.1730         |                     |
| 2.008 |               |          |               |             | -149.61883493 | 1.1369       | -149.62205247                                                                                                  | -149.62381126 | -3.6731       | -149.97888773 | -10.9001      | -225.9366   | -12.0370         |                     |

|       |               |        |               |               |         |               |         |           |          |
|-------|---------------|--------|---------------|---------------|---------|---------------|---------|-----------|----------|
| 2.028 | -149.61863568 | 1.2619 | -149.62109000 | -149.62270170 | -2.9768 | -149.97700740 | -9.7202 | -224.8817 | -10.9821 |
| 2.048 | -149.61848949 | 1.3536 | -149.62026963 | -149.62174409 | -2.3759 | -149.97531069 | -8.6555 | -223.9087 | -10.0091 |
| 2.068 | -149.61838917 | 1.4166 | -149.61957745 | -149.62092473 | -1.8617 | -149.97378810 | -7.7000 | -223.0162 | -9.1166  |
| 2.088 | -149.61832809 | 1.4549 | -149.61899959 | -149.62022977 | -1.4257 | -149.97242882 | -6.8471 | -222.2016 | -8.3020  |
| 2.108 | -149.61830020 | 1.4724 | -149.61852257 | -149.61964550 | -1.0590 | -149.97122105 | -6.0892 | -221.4612 | -7.5616  |
| 2.128 | -149.61830006 | 1.4725 | -149.61813359 | -149.61915875 | -0.7536 | -149.97015241 | -5.4186 | -220.7907 | -6.8911  |
| 2.148 | -149.61832278 | 1.4582 | -149.61782075 | -149.61875706 | -0.5015 | -149.96921025 | -4.8274 | -220.1853 | -6.2856  |
| 2.168 | -149.61836406 | 1.4323 | -149.61757312 | -149.61842893 | -0.2956 | -149.96838209 | -4.3077 | -219.6397 | -5.7400  |
| 2.188 | -149.61842010 | 1.3972 | -149.61738089 | -149.61816386 | -0.1293 | -149.96765583 | -3.8520 | -219.1488 | -5.2491  |
| 2.238 | -149.61860437 | 1.2815 | -149.61708780 | -149.61771798 | 0.1505  | -149.96621285 | -2.9465 | -218.1277 | -4.2280  |
| 2.288 | -149.61882193 | 1.1450 | -149.61697996 | -149.61749148 | 0.2927  | -149.96518182 | -2.2995 | -217.3442 | -3.4445  |
| 2.338 | -149.61904693 | 1.0038 | -149.61698218 | -149.61740100 | 0.3494  | -149.96444220 | -1.8354 | -216.7388 | -2.8392  |
| 2.388 | -149.61926360 | 0.8679 | -149.61704496 | -149.61739066 | 0.3559  | -149.96390568 | -1.4987 | -216.2662 | -2.3666  |
| 2.438 | -149.61946320 | 0.7426 | -149.61713688 | -149.61742429 | 0.3348  | -149.96350978 | -1.2503 | -215.8925 | -1.9929  |
| 2.488 | -149.61964165 | 0.6306 | -149.61723884 | -149.61747929 | 0.3003  | -149.96321124 | -1.0630 | -215.5932 | -1.6936  |
| 2.538 | -149.61979787 | 0.5326 | -149.61733975 | -149.61754200 | 0.2609  | -149.96298052 | -0.9182 | -215.3504 | -1.4508  |
| 2.588 | -149.61993257 | 0.4481 | -149.61743368 | -149.61760458 | 0.2217  | -149.96279760 | -0.8034 | -215.1511 | -1.2515  |
| 2.638 | -149.62004744 | 0.3760 | -149.61751789 | -149.61766287 | 0.1851  | -149.96264895 | -0.7101 | -214.9857 | -1.0861  |
| 2.688 | -149.62014463 | 0.3150 | -149.61759154 | -149.61771496 | 0.1524  | -149.96252540 | -0.6326 | -214.8472 | -0.9476  |
| 2.738 | -149.62022642 | 0.2637 | -149.61765487 | -149.61776026 | 0.1240  | -149.96242071 | -0.5669 | -214.7302 | -0.8306  |
| 2.788 | -149.62029499 | 0.2207 | -149.61770868 | -149.61779892 | 0.0997  | -149.96233057 | -0.5103 | -214.6306 | -0.7310  |
| 2.838 | -149.62035233 | 0.1847 | -149.61775401 | -149.61783147 | 0.0793  | -149.96225199 | -0.4610 | -214.5453 | -0.6457  |
| 2.888 | -149.62040021 | 0.1546 | -149.61779194 | -149.61785858 | 0.0623  | -149.96218278 | -0.4176 | -214.4718 | -0.5722  |
| 2.938 | -149.62044013 | 0.1296 | -149.61782349 | -149.61788097 | 0.0482  | -149.96212136 | -0.3791 | -214.4083 | -0.5086  |
| 2.988 | -149.62047339 | 0.1087 | -149.61784962 | -149.61789929 | 0.0367  | -149.96206652 | -0.3446 | -214.3530 | -0.4533  |
| 3.038 | -149.62050105 | 0.0913 | -149.61787114 | -149.61791416 | 0.0274  | -149.96201732 | -0.3138 | -214.3047 | -0.4051  |
| 3.088 | -149.62052402 | 0.0769 | -149.61788876 | -149.61792611 | 0.0199  | -149.96197300 | -0.2860 | -214.2625 | -0.3629  |
| 3.138 | -149.62054305 | 0.0650 | -149.61790310 | -149.61793559 | 0.0140  | -149.96193294 | -0.2608 | -214.2254 | -0.3258  |
| 3.188 | -149.62055878 | 0.0551 | -149.61791467 | -149.61794300 | 0.0093  | -149.96189665 | -0.2380 | -214.1928 | -0.2932  |
| 3.238 | -149.62057173 | 0.0470 | -149.61792394 | -149.61794870 | 0.0057  | -149.96186370 | -0.2174 | -214.1640 | -0.2644  |
| 3.288 | -149.62058237 | 0.0403 | -149.61793129 | -149.61795297 | 0.0031  | -149.96183374 | -0.1986 | -214.1385 | -0.2389  |
| 3.338 | -149.62059108 | 0.0349 | -149.61793705 | -149.61795609 | 0.0011  | -149.96180648 | -0.1815 | -214.1159 | -0.2163  |
| 3.388 | -149.62059820 | 0.0304 | -149.61794151 | -149.61795827 | -0.0003 | -149.96178165 | -0.1659 | -214.0959 | -0.1963  |
| 3.438 | -149.62060401 | 0.0267 | -149.61794492 | -149.61795971 | -0.0012 | -149.96175904 | -0.1517 | -214.0781 | -0.1784  |
| 3.488 | -149.62060876 | 0.0238 | -149.61794750 | -149.61796058 | -0.0017 | -149.96173846 | -0.1388 | -214.0622 | -0.1625  |
| 3.538 | -149.62061267 | 0.0213 | -149.61794942 | -149.61796103 | -0.0020 | -149.96171975 | -0.1270 | -214.0480 | -0.1483  |
| 3.588 | -149.62061590 | 0.0193 | -149.61795086 | -149.61796118 | -0.0021 | -149.96170275 | -0.1164 | -214.0353 | -0.1356  |
| 3.638 | -149.62061860 | 0.0176 | -149.61795192 | -149.61796113 | -0.0021 | -149.96168732 | -0.1067 | -214.0239 | -0.1243  |
| 3.688 | -149.62062091 | 0.0161 | -149.61795273 | -149.61796096 | -0.0020 | -149.96167334 | -0.0979 | -214.0137 | -0.1140  |
| 3.738 | -149.62062290 | 0.0149 | -149.61795335 | -149.61796073 | -0.0018 | -149.96166068 | -0.0900 | -214.0045 | -0.1049  |
| 3.788 | -149.62062468 | 0.0138 | -149.61795386 | -149.61796049 | -0.0017 | -149.96164924 | -0.0828 | -213.9962 | -0.0966  |
| 3.838 | -149.62062628 | 0.0128 | -149.61795431 | -149.61796028 | -0.0015 | -149.96163890 | -0.0763 | -213.9887 | -0.0891  |
| 3.888 | -149.62062775 | 0.0118 | -149.61795471 | -149.61796010 | -0.0014 | -149.96162956 | -0.0704 | -213.9819 | -0.0823  |
| 3.938 | -149.62062912 | 0.0110 | -149.61795510 | -149.61795998 | -0.0013 | -149.96162112 | -0.0651 | -213.9758 | -0.0761  |
| 3.988 | -149.62063041 | 0.0102 | -149.61795548 | -149.61795991 | -0.0013 | -149.96161349 | -0.0604 | -213.9702 | -0.0705  |
| 4.038 | -149.62063163 | 0.0094 | -149.61795585 | -149.61795989 | -0.0013 | -149.96160658 | -0.0560 | -213.9651 | -0.0654  |
| 4.088 | -149.62063279 | 0.0087 | -149.61795623 | -149.61795991 | -0.0013 | -149.96160031 | -0.0521 | -213.9604 | -0.0608  |
| 4.138 | -149.62063389 | 0.0080 | -149.61795660 | -149.61795996 | -0.0013 | -149.96159461 | -0.0485 | -213.9561 | -0.0565  |
| 4.188 | -149.62063491 | 0.0073 | -149.61795695 | -149.61796003 | -0.0014 | -149.96158941 | -0.0452 | -213.9522 | -0.0526  |
| 4.238 | -149.62063588 | 0.0067 | -149.61795728 | -149.61796011 | -0.0014 | -149.96158465 | -0.0423 | -213.9486 | -0.0490  |
| 4.288 | -149.62063677 | 0.0062 | -149.61795759 | -149.61796019 | -0.0015 | -149.96158028 | -0.0395 | -213.9453 | -0.0457  |
| 4.338 | -149.62063760 | 0.0057 | -149.61795787 | -149.61796026 | -0.0015 | -149.96157626 | -0.0370 | -213.9423 | -0.0427  |
| 4.388 | -149.62063835 | 0.0052 | -149.61795811 | -149.61796032 | -0.0015 | -149.96157254 | -0.0347 | -213.9395 | -0.0399  |
| 4.438 | -149.62063904 | 0.0048 | -149.61795832 | -149.61796037 | -0.0016 | -149.96156909 | -0.0325 | -213.9369 | -0.0373  |
| 4.488 | -149.62063965 | 0.0044 | -149.61795849 | -149.61796039 | -0.0016 | -149.96156589 | -0.0305 | -213.9345 | -0.0349  |
| 4.538 | -149.62064020 | 0.0040 | -149.61795863 | -149.61796038 | -0.0016 | -149.96156290 | -0.0286 | -213.9323 | -0.0326  |
| 4.588 | -149.62064069 | 0.0037 | -149.61795873 | -149.61796036 | -0.0016 | -149.96156011 | -0.0269 | -213.9302 | -0.0306  |
| 4.638 | -149.62064113 | 0.0034 | -149.61795879 | -149.61796031 | -0.0015 | -149.96155750 | -0.0252 | -213.9283 | -0.0287  |
| 4.688 | -149.62064151 | 0.0032 | -149.61795883 | -149.61796024 | -0.0015 | -149.96155505 | -0.0237 | -213.9265 | -0.0269  |
| 4.738 | -149.62064213 | 0.0028 | -149.61795883 | -149.61796006 | -0.0014 | -149.96155060 | -0.0209 | -213.9233 | -0.0237  |
| 4.788 | -149.62064260 | 0.0025 | -149.61795876 | -149.61795983 | -0.0012 | -149.96154668 | -0.0184 | -213.9206 | -0.0210  |
| 4.838 | -149.62064295 | 0.0023 | -149.61795863 | -149.61795958 | -0.0011 | -149.96154322 | -0.0163 | -213.9182 | -0.0186  |
| 4.888 | -149.62064322 | 0.0021 | -149.61795848 | -149.61795931 | -0.0009 | -149.96154016 | -0.0143 | -213.9161 | -0.0165  |
| 4.938 | -149.62064344 | 0.0020 | -149.61795831 | -149.61795905 | -0.0008 | -149.96153746 | -0.0127 | -213.9143 | -0.0146  |
| 4.988 | -149.62064361 | 0.0019 | -149.61795815 | -149.61795881 | -0.0006 | -149.96153509 | -0.0112 | -213.9127 | -0.0131  |
| 5.038 | -149.62064375 | 0.0018 | -149.61795800 | -149.61795858 | -0.0005 | -149.96153299 | -0.0098 | -213.9113 | -0.0116  |
| 5.088 | -149.62064388 | 0.0017 | -149.61795786 | -149.61795838 | -0.0003 | -149.96153115 | -0.0087 | -213.9100 | -0.0104  |
| 5.138 | -149.62064399 | 0.0017 | -149.61795774 | -149.61795820 | -0.0002 | -149.96152952 | -0.0077 | -213.9089 | -0.0093  |
| 5.188 | -149.62064410 | 0.0016 | -149.61795763 | -149.61795805 | -0.0001 | -149.96152809 | -0.0068 | -213.9080 | -0.0084  |
| 5.238 | -149.62064420 | 0.0015 | -149.61795754 | -149.61795791 | 0.0000  | -149.96152682 | -0.0060 | -213.9071 | -0.0075  |
| 5.288 | -149.62064429 | 0.0015 | -149.61795746 | -149.61795780 | 0.0000  | -149.96152571 | -0.0053 | -213.9064 | -0.0067  |
| 5.338 | -149.62064439 | 0.0014 | -149.61795740 | -149.61795770 | 0.0001  | -149.96152473 | -0.0047 | -213.9057 | -0.0061  |
| 5.388 | -149.62064448 | 0.0013 | -149.61795735 | -149.61795763 | 0.0001  | -149.96152387 | -0.0041 | -213.9051 | -0.0055  |
| 5.438 | -149.62064457 | 0.0013 | -149.61795732 | -149.61795756 | 0.0002  | -149.96152311 | -0.0036 | -213.9046 | -0.0049  |



|        |  |               |        |               |               |        |               |         |           |         |
|--------|--|---------------|--------|---------------|---------------|--------|---------------|---------|-----------|---------|
| 6.288  |  | -149.62064466 | 0.0012 | -149.61795729 | -149.61795752 | 0.0002 | -149.96152245 | -0.0032 | -213.9041 | -0.0045 |
| 6.388  |  | -149.62064475 | 0.0012 | -149.61795727 | -149.61795748 | 0.0002 | -149.96152186 | -0.0029 | -213.9037 | -0.0040 |
| 6.488  |  | -149.62064484 | 0.0011 | -149.61795727 | -149.61795745 | 0.0003 | -149.96152135 | -0.0025 | -213.9033 | -0.0037 |
| 6.588  |  | -149.62064493 | 0.0011 | -149.61795727 | -149.61795744 | 0.0003 | -149.96152092 | -0.0023 | -213.9030 | -0.0033 |
| 6.688  |  | -149.62064501 | 0.0010 | -149.61795727 | -149.61795743 | 0.0003 | -149.96152052 | -0.0020 | -213.9027 | -0.0030 |
| 6.788  |  | -149.62064510 | 0.0010 | -149.61795729 | -149.61795743 | 0.0003 | -149.96152018 | -0.0018 | -213.9024 | -0.0028 |
| 6.888  |  | -149.62064518 | 0.0009 | -149.61795730 | -149.61795743 | 0.0003 | -149.96151987 | -0.0016 | -213.9021 | -0.0025 |
| 6.988  |  | -149.62064526 | 0.0009 | -149.61795732 | -149.61795744 | 0.0003 | -149.96151961 | -0.0014 | -213.9019 | -0.0023 |
| 7.088  |  | -149.62064534 | 0.0008 | -149.61795734 | -149.61795745 | 0.0003 | -149.96151937 | -0.0013 | -213.9017 | -0.0021 |
| 7.188  |  | -149.62064541 | 0.0008 | -149.61795736 | -149.61795746 | 0.0002 | -149.96151917 | -0.0012 | -213.9016 | -0.0019 |
| 7.288  |  | -149.62064549 | 0.0007 | -149.61795739 | -149.61795748 | 0.0002 | -149.96151899 | -0.0011 | -213.9014 | -0.0018 |
| 7.388  |  | -149.62064555 | 0.0007 | -149.61795741 | -149.61795749 | 0.0002 | -149.96151883 | -0.0010 | -213.9013 | -0.0016 |
| 7.488  |  | -149.62064562 | 0.0006 | -149.61795743 | -149.61795751 | 0.0002 | -149.96151868 | -0.0009 | -213.9011 | -0.0015 |
| 7.588  |  | -149.62064568 | 0.0006 | -149.61795746 | -149.61795753 | 0.0002 | -149.96151856 | -0.0008 | -213.9010 | -0.0014 |
| 7.688  |  | -149.62064573 | 0.0006 | -149.61795748 | -149.61795754 | 0.0002 | -149.96151845 | -0.0007 | -213.9009 | -0.0013 |
| 7.788  |  | -149.62064579 | 0.0005 | -149.61795750 | -149.61795756 | 0.0002 | -149.96151835 | -0.0007 | -213.9008 | -0.0012 |
| 7.888  |  | -149.62064584 | 0.0005 | -149.61795752 | -149.61795758 | 0.0002 | -149.96151826 | -0.0006 | -213.9007 | -0.0011 |
| 7.988  |  | -149.62064589 | 0.0005 | -149.61795754 | -149.61795759 | 0.0002 | -149.96151818 | -0.0006 | -213.9006 | -0.0010 |
| 8.088  |  | -149.62064593 | 0.0004 | -149.61795756 | -149.61795760 | 0.0002 | -149.96151811 | -0.0005 | -213.9006 | -0.0009 |
| 8.188  |  | -149.62064597 | 0.0004 | -149.61795757 | -149.61795762 | 0.0001 | -149.96151804 | -0.0005 | -213.9005 | -0.0009 |
| 8.288  |  | -149.62064601 | 0.0004 | -149.61795759 | -149.61795763 | 0.0001 | -149.96151799 | -0.0004 | -213.9004 | -0.0008 |
| 8.388  |  | -149.62064604 | 0.0004 | -149.61795760 | -149.61795764 | 0.0001 | -149.96151793 | -0.0004 | -213.9004 | -0.0008 |
| 8.488  |  | -149.62064608 | 0.0003 | -149.61795762 | -149.61795765 | 0.0001 | -149.96151789 | -0.0004 | -213.9003 | -0.0007 |
| 8.588  |  | -149.62064611 | 0.0003 | -149.61795763 | -149.61795767 | 0.0001 | -149.96151784 | -0.0003 | -213.9003 | -0.0007 |
| 8.688  |  | -149.62064614 | 0.0003 | -149.61795764 | -149.61795768 | 0.0001 | -149.96151780 | -0.0003 | -213.9002 | -0.0006 |
| 8.788  |  | -149.62064617 | 0.0003 | -149.61795766 | -149.61795769 | 0.0001 | -149.96151777 | -0.0003 | -213.9002 | -0.0006 |
| 8.888  |  | -149.62064619 | 0.0003 | -149.61795767 | -149.61795769 | 0.0001 | -149.96151773 | -0.0003 | -213.9002 | -0.0005 |
| 8.988  |  | -149.62064622 | 0.0003 | -149.61795768 | -149.61795770 | 0.0001 | -149.96151770 | -0.0003 | -213.9001 | -0.0005 |
| 9.088  |  | -149.62064624 | 0.0002 | -149.61795769 | -149.61795771 | 0.0001 | -149.96151768 | -0.0002 | -213.9001 | -0.0005 |
| 9.188  |  | -149.62064626 | 0.0002 | -149.61795770 | -149.61795772 | 0.0001 | -149.96151765 | -0.0002 | -213.9001 | -0.0004 |
| 9.288  |  | -149.62064628 | 0.0002 | -149.61795770 | -149.61795772 | 0.0001 | -149.96151763 | -0.0002 | -213.9000 | -0.0004 |
| 9.388  |  | -149.62064630 | 0.0002 | -149.61795771 | -149.61795773 | 0.0001 | -149.96151760 | -0.0002 | -213.9000 | -0.0004 |
| 9.488  |  | -149.62064631 | 0.0002 | -149.61795772 | -149.61795774 | 0.0001 | -149.96151758 | -0.0002 | -213.9000 | -0.0004 |
| 9.588  |  | -149.62064633 | 0.0002 | -149.61795773 | -149.61795774 | 0.0001 | -149.96151757 | -0.0002 | -213.9000 | -0.0004 |
| 9.688  |  | -149.62064635 | 0.0002 | -149.61795773 | -149.61795775 | 0.0001 | -149.96151755 | -0.0002 | -213.9000 | -0.0003 |
| 20.000 |  | -149.62064662 | 0.0000 | -149.61795785 | -149.61795785 | 0.0000 | -149.96151730 | 0.0000  | -213.8996 | 0.0000  |

| Re                  |                  |                     |
|---------------------|------------------|---------------------|
| 1.208               |                  |                     |
| DCE(2) (Re-shifted) |                  |                     |
| AR                  | vCASC13-SCGVB(2) | Δ(vCASC13-SCGVB(2)) |
| -0.330              | -255.0118        | -41.1122            |
| -0.320              | -255.1902        | -41.2906            |
| -0.310              | -255.3745        | -41.4749            |
| -0.300              | -255.5645        | -41.6649            |
| -0.290              | -255.7600        | -41.8604            |
| -0.280              | -255.9608        | -42.0611            |
| -0.270              | -256.1665        | -42.2669            |
| -0.260              | -256.3770        | -42.4774            |
| -0.250              | -256.5918        | -42.6922            |
| -0.240              | -256.8106        | -42.9110            |
| -0.230              | -257.0330        | -43.1334            |
| -0.220              | -257.2586        | -43.3589            |
| -0.210              | -257.4868        | -43.5872            |
| -0.200              | -257.7173        | -43.8177            |
| -0.190              | -257.9495        | -44.0498            |
| -0.180              | -258.1828        | -44.2832            |
| -0.160              | -258.6506        | -44.7510            |
| -0.140              | -259.1159        | -45.2163            |
| -0.120              | -259.5732        | -45.6735            |
| -0.100              | -260.0167        | -46.1171            |
| -0.080              | -260.4405        | -46.5408            |
| -0.060              | -260.8380        | -46.9383            |
| -0.040              | -261.2026        | -47.3029            |
| -0.020              | -261.5276        | -47.6280            |
| 0.000               | -261.8063        | -47.9067            |
| 0.020               | -262.0323        | -48.1326            |
| 0.040               | -262.1991        | -48.2995            |
| 0.060               | -262.3011        | -48.4015            |
| 0.080               | -262.3328        | -48.4332            |
| 0.100               | -262.2898        | -48.3901            |
| 0.120               | -262.1679        | -48.2683            |
| 0.140               | -261.9642        | -48.0646            |
| 0.160               | -261.6763        | -47.7767            |
| 0.180               | -261.3029        | -47.4032            |
| 0.200               | -260.8433        | -46.9437            |
| 0.220               | -260.2979        | -46.3983            |
| 0.240               | -259.6678        | -45.7681            |
| 0.260               | -258.9548        | -45.0551            |
| 0.280               | -258.1615        | -44.2619            |
| 0.300               | -257.2912        | -43.3916            |
| 0.320               | -256.3477        | -42.4481            |
| 0.340               | -255.3354        | -41.4358            |
| 0.360               | -254.2589        | -40.3593            |
| 0.380               | -253.1235        | -39.2239            |
| 0.400               | -251.9347        | -38.0350            |
| 0.420               | -250.6979        | -36.7983            |
| 0.440               | -249.4191        | -35.5195            |
| 0.460               | -248.1043        | -34.2047            |
| 0.480               | -246.7596        | -32.8600            |
| 0.500               | -245.3911        | -31.4914            |
| 0.520               | -244.0049        | -30.1053            |
| 0.540               | -242.6075        | -28.7079            |
| 0.560               | -241.2051        | -27.3055            |
| 0.580               | -239.8040        | -25.9044            |
| 0.600               | -238.4108        | -24.5112            |
| 0.620               | -237.0319        | -23.1323            |
| 0.640               | -235.6739        | -21.7743            |
| 0.660               | -234.3433        | -20.4437            |
| 0.680               | -233.0466        | -19.1470            |
| 0.700               | -231.7902        | -17.8906            |
| 0.720               | -230.5802        | -16.6806            |
| 0.740               | -229.4220        | -15.5224            |
| 0.760               | -228.0014        | -14.1018            |
| 0.780               | -227.0726        | -13.1730            |
| 0.800               | -225.9366        | -12.0370            |

|       |           |          |
|-------|-----------|----------|
| 0.820 | -224.8817 | -10.9821 |
| 0.840 | -223.9087 | -10.0091 |
| 0.860 | -223.0162 | -9.1166  |
| 0.880 | -222.2016 | -8.3020  |
| 0.900 | -221.4612 | -7.5616  |
| 0.920 | -220.7907 | -6.8911  |
| 0.940 | -220.1853 | -6.2856  |
| 0.960 | -219.6397 | -5.7400  |
| 0.980 | -219.1488 | -5.2491  |
| 1.030 | -218.1277 | -4.2280  |
| 1.080 | -217.3442 | -3.4445  |
| 1.130 | -216.7388 | -2.8392  |
| 1.180 | -216.2662 | -2.3666  |
| 1.230 | -215.8925 | -1.9929  |
| 1.280 | -215.5932 | -1.6936  |
| 1.330 | -215.3504 | -1.4508  |
| 1.380 | -215.1511 | -1.2515  |
| 1.430 | -214.9857 | -1.0861  |
| 1.480 | -214.8472 | -0.9476  |
| 1.530 | -214.7302 | -0.8306  |
| 1.580 | -214.6306 | -0.7310  |
| 1.630 | -214.5453 | -0.6457  |
| 1.680 | -214.4718 | -0.5722  |
| 1.730 | -214.4083 | -0.5086  |
| 1.780 | -214.3530 | -0.4533  |
| 1.830 | -214.3047 | -0.4051  |
| 1.880 | -214.2625 | -0.3629  |
| 1.930 | -214.2254 | -0.3258  |
| 1.980 | -214.1928 | -0.2932  |
| 2.030 | -214.1640 | -0.2644  |
| 2.080 | -214.1385 | -0.2389  |
| 2.130 | -214.1159 | -0.2163  |
| 2.180 | -214.0959 | -0.1963  |
| 2.230 | -214.0781 | -0.1784  |
| 2.280 | -214.0622 | -0.1625  |
| 2.330 | -214.0480 | -0.1483  |
| 2.380 | -214.0353 | -0.1356  |
| 2.430 | -214.0239 | -0.1243  |
| 2.480 | -214.0137 | -0.1140  |
| 2.530 | -214.0045 | -0.1049  |
| 2.580 | -213.9962 | -0.0966  |
| 2.630 | -213.9887 | -0.0891  |
| 2.680 | -213.9819 | -0.0823  |
| 2.730 | -213.9758 | -0.0761  |
| 2.780 | -213.9702 | -0.0705  |
| 2.830 | -213.9651 | -0.0654  |
| 2.880 | -213.9604 | -0.0608  |
| 2.930 | -213.9561 | -0.0565  |
| 2.980 | -213.9522 | -0.0526  |
| 3.030 | -213.9486 | -0.0490  |
| 3.080 | -213.9453 | -0.0457  |
| 3.130 | -213.9423 | -0.0427  |
| 3.180 | -213.9395 | -0.0399  |
| 3.230 | -213.9369 | -0.0373  |
| 3.280 | -213.9345 | -0.0349  |
| 3.330 | -213.9323 | -0.0326  |
| 3.380 | -213.9302 | -0.0306  |
| 3.430 | -213.9283 | -0.0287  |
| 3.480 | -213.9265 | -0.0269  |
| 3.580 | -213.9233 | -0.0237  |
| 3.680 | -213.9206 | -0.0210  |
| 3.780 | -213.9182 | -0.0186  |
| 3.880 | -213.9161 | -0.0165  |
| 3.980 | -213.9143 | -0.0146  |
| 4.080 | -213.9127 | -0.0131  |
| 4.180 | -213.9113 | -0.0116  |
| 4.280 | -213.9100 | -0.0104  |
| 4.380 | -213.9089 | -0.0093  |
| 4.480 | -213.9080 | -0.0084  |
| 4.580 | -213.9071 | -0.0075  |
| 4.680 | -213.9064 | -0.0067  |
| 4.780 | -213.9057 | -0.0061  |
| 4.880 | -213.9051 | -0.0055  |
| 4.980 | -213.9046 | -0.0049  |

|        |           |         |
|--------|-----------|---------|
| 5.080  | -213.9041 | -0.0045 |
| 5.180  | -213.9037 | -0.0040 |
| 5.280  | -213.9033 | -0.0037 |
| 5.380  | -213.9030 | -0.0033 |
| 5.480  | -213.9027 | -0.0030 |
| 5.580  | -213.9024 | -0.0028 |
| 5.680  | -213.9021 | -0.0025 |
| 5.780  | -213.9019 | -0.0023 |
| 5.880  | -213.9017 | -0.0021 |
| 5.980  | -213.9016 | -0.0019 |
| 6.080  | -213.9014 | -0.0018 |
| 6.180  | -213.9013 | -0.0016 |
| 6.280  | -213.9011 | -0.0015 |
| 6.380  | -213.9010 | -0.0014 |
| 6.480  | -213.9009 | -0.0013 |
| 6.580  | -213.9008 | -0.0012 |
| 6.680  | -213.9007 | -0.0011 |
| 6.780  | -213.9006 | -0.0010 |
| 6.880  | -213.9006 | -0.0009 |
| 6.980  | -213.9005 | -0.0009 |
| 7.080  | -213.9004 | -0.0008 |
| 7.180  | -213.9004 | -0.0008 |
| 7.280  | -213.9003 | -0.0007 |
| 7.380  | -213.9003 | -0.0007 |
| 7.480  | -213.9002 | -0.0006 |
| 7.580  | -213.9002 | -0.0006 |
| 7.680  | -213.9002 | -0.0005 |
| 7.780  | -213.9001 | -0.0005 |
| 7.880  | -213.9001 | -0.0005 |
| 7.980  | -213.9001 | -0.0004 |
| 8.080  | -213.9000 | -0.0004 |
| 8.180  | -213.9000 | -0.0004 |
| 8.280  | -213.9000 | -0.0004 |
| 8.380  | -213.9000 | -0.0004 |
| 8.480  | -213.9000 | -0.0003 |
| 18.792 | -213.8996 | 0.0000  |

F2: RHF, CCSD(T), SCGVB, vCAS and vCASCI ENERGIES

| R(Å)  | E(R=∞)        |         | E(R=∞)        |             | E(R=20.00)    |           | E(R=20.0)     |               | E(R=20.0)     |               | E(R=20.0)     |               | EDEC(R=20.0)     |  |
|-------|---------------|---------|---------------|-------------|---------------|-----------|---------------|---------------|---------------|---------------|---------------|---------------|------------------|--|
|       | -198.818419   |         | -199.305437   |             | -198.81841799 |           | -198.81841801 |               | -198.81841801 |               | -199.26920139 |               | -282.87091102    |  |
|       | E(RHF)        | ΔE(RHF) | E[CCSD(T)]    | ΔE[CCSD(T)] | E(SCGVB)      | ΔE(SCGVB) | E(vCAS1)      | E(vCAS3)      | ΔE(vCAS3)     | E(vCASCI3)    | ΔE(vCASCI3)   | vCASCI3-SCGVB | Δ(vCASCI3-SCGVB) |  |
| 1.084 |               |         |               |             | -198.70182562 | 73.1628   | -198.70394278 | -198.70561823 | 70.7829       | -199.19067640 | 49.2752       | -306.7586     | -23.8876         |  |
| 1.094 |               |         |               |             | -198.71335339 | 65.9290   | -198.71549218 | -198.71722458 | 63.4998       | -199.20211765 | 42.0957       | -306.7043     | -23.8334         |  |
| 1.104 |               |         |               |             | -198.72411049 | 59.1789   | -198.72626907 | -198.72805691 | 56.7025       | -199.21278251 | 35.4034       | -306.6464     | -23.7755         |  |
| 1.114 |               |         |               |             | -198.73414231 | 52.8838   | -198.73631879 | -198.73816037 | 50.3624       | -199.22271554 | 29.1703       | -306.5844     | -23.7135         |  |
| 1.124 |               |         |               |             | -198.74349160 | 47.0170   | -198.74568404 | -198.74757747 | 44.4531       | -199.23195868 | 23.3702       | -306.5178     | -23.6469         |  |
| 1.134 |               |         |               |             | -198.75219860 | 41.5533   | -198.75440503 | -198.75634826 | 38.9494       | -199.24055147 | 17.9781       | -306.4461     | -23.5752         |  |
| 1.144 |               |         |               |             | -198.76030123 | 36.4688   | -198.76251964 | -198.76451046 | 33.8275       | -199.24853113 | 12.9708       | -306.3689     | -23.4980         |  |
| 1.154 |               |         |               |             | -198.76783517 | 31.7412   | -198.77006356 | -198.77209963 | 29.0652       | -199.25593276 | 8.3262        | -306.2859     | -23.4150         |  |
| 1.164 |               |         |               |             | -198.77483405 | 27.3493   | -198.77707043 | -198.77914929 | 24.6415       | -199.26278946 | 4.0235        | -306.1967     | -23.3258         |  |
| 1.174 |               |         |               |             | -198.78132956 | 23.2733   | -198.78357195 | -198.78569104 | 20.5365       | -199.26913245 | 0.0433        | -306.1010     | -23.2301         |  |
| 1.184 |               |         |               |             | -198.78735158 | 19.4945   | -198.78959800 | -198.79175468 | 16.7315       | -199.27499118 | -3.6331       | -305.9985     | -23.1276         |  |
| 1.194 |               |         |               |             | -198.79292825 | 15.9951   | -198.79517679 | -198.79736835 | 13.2089       | -199.28039346 | -7.0231       | -305.8891     | -23.0181         |  |
| 1.204 |               |         |               |             | -198.79808614 | 12.7584   | -198.80033489 | -198.80255858 | 9.9519        | -199.28536556 | -10.1432      | -305.7725     | -22.9016         |  |
| 1.214 |               |         |               |             | -198.80285028 | 9.7689    | -198.80509740 | -198.80735042 | 6.9450        | -199.28993228 | -13.0088      | -305.6486     | -22.7777         |  |
| 1.224 |               |         |               |             | -198.80724431 | 7.0116    | -198.80948800 | -198.81176752 | 4.1732        | -199.29411707 | -15.6348      | -305.5173     | -22.6464         |  |
| 1.234 |               |         |               |             | -198.81129052 | 4.4726    | -198.81352904 | -198.81583223 | 1.6226        | -199.29794212 | -18.0351      | -305.3786     | -22.5076         |  |
| 1.254 |               |         |               |             | -198.81842251 | -0.0028   | -198.82064569 | -198.82298774 | -2.8675       | -199.30459571 | -22.2103      | -305.0784     | -22.2074         |  |
| 1.274 |               |         |               |             | -198.82440097 | -3.7544   | -198.82660251 | -198.82897228 | -6.6229       | -199.31004773 | -25.6315      | -304.7480     | -21.8771         |  |
| 1.294 |               |         |               |             | -198.82936389 | -6.8687   | -198.83153802 | -198.83392464 | -9.7306       | -199.31443684 | -28.3857      | -304.3879     | -21.5170         |  |
| 1.314 |               |         |               |             | -198.83343447 | -9.4230   | -198.83557591 | -198.83796897 | -12.2684      | -199.31788756 | -30.5510      | -303.9990     | -21.1281         |  |
| 1.334 | -198.77525067 | 27.0883 | -199.36160917 | -35.2487    | -198.83672273 | -11.4864  | -198.83882670 | -198.84121634 | -14.3062      | -199.32051175 | -32.1977      | -303.5823     | -20.7113         |  |
| 1.354 | -198.77457906 | 27.5098 | -199.36354445 | -36.4631    | -198.83932694 | -13.1206  | -198.84138916 | -198.84376613 | -15.9062      | -199.32241006 | -33.3890      | -303.1393     | -20.2684         |  |
| 1.374 | -198.77321114 | 28.3682 | -199.36482413 | -37.2661    | -198.84133488 | -14.3806  | -198.84335155 | -198.84570729 | -17.1243      | -199.32367306 | -34.1815      | -302.6718     | -19.8009         |  |
| 1.394 | -198.77122918 | 29.6119 | -199.36552990 | -37.7090    | -198.84282493 | -15.3156  | -198.84479272 | -198.84711940 | -18.0104      | -199.32438227 | -34.6265      | -302.1819     | -19.3109         |  |
| 1.414 | -198.76870727 | 31.1944 | -199.36573566 | -37.8381    | -198.84386705 | -15.9695  | -198.84578308 | -198.84807362 | -18.6902      | -199.32461110 | -34.7701      | -301.6715     | -18.8006         |  |
| 1.434 | -198.76571213 | 33.0739 | -199.36550800 | -37.6953    | -198.84452363 | -16.3815  | -198.84638545 | -198.84863352 | -18.9605      | -199.32442562 | -34.6537      | -301.1431     | -18.2722         |  |
| 1.454 | -198.76230387 | 35.2126 | -199.36490712 | -37.3182    | -198.84485026 | -16.5865  | -198.84665585 | -198.84885586 | -19.1000      | -199.32388527 | -34.3147      | -300.5991     | -17.7282         |  |
| 1.474 | -198.75853664 | 37.5766 | -199.36398898 | -36.7421    | -198.84489642 | -16.6155  | -198.84664414 | -198.84879123 | -19.0595      | -199.32304351 | -33.7864      | -300.0419     | -17.1710         |  |
| 1.494 | -198.75445922 | 40.1352 | -199.36279955 | -35.9957    | -198.84470604 | -16.4960  | -198.84639464 | -198.84848468 | -18.8671      | -199.32194834 | -33.0992      | -299.4741     | -16.6032         |  |
| 1.514 |               |         |               |             | -198.84431814 | -16.2526  | -198.84594671 | -198.84797623 | -18.5481      | -199.32064280 | -32.2800      | -298.8983     | -16.0274         |  |
| 1.534 |               |         |               |             | -198.84376721 | -15.9069  | -198.84533520 | -198.84730137 | -18.1246      | -199.31916544 | -31.3529      | -298.3170     | -15.4460         |  |
| 1.554 |               |         |               |             | -198.84308375 | -15.4780  | -198.84459089 | -198.84649150 | -17.6164      | -199.31755071 | -30.3397      | -297.7326     | -14.8617         |  |
| 1.574 |               |         |               |             | -198.84229457 | -14.9828  | -198.84374091 | -198.84557428 | -17.0408      | -199.31582928 | -29.2594      | -297.1476     | -14.2767         |  |
| 1.594 |               |         |               |             | -198.84142323 | -14.4360  | -198.84280907 | -198.84457405 | -16.4132      | -199.31402839 | -28.1294      | -296.5643     | -13.6934         |  |
| 1.614 |               |         |               |             | -198.84049031 | -13.8506  | -198.84181619 | -198.84351212 | -15.7468      | -199.31217216 | -26.9646      | -295.9849     | -13.1140         |  |
| 1.634 |               |         |               |             | -198.83951370 | -13.2378  | -198.84078041 | -198.84240703 | -15.0533      | -199.31028179 | -25.7783      | -295.4115     | -12.5406         |  |
| 1.654 |               |         |               |             | -198.83850889 | -12.6072  | -198.83971740 | -198.84127486 | -14.3429      | -199.30837585 | -24.5823      | -294.8460     | -11.9751         |  |
| 1.674 |               |         |               |             | -198.83748921 | -11.9674  | -198.83864066 | -198.84012945 | -13.6241      | -199.30647050 | -23.3867      | -294.2903     | -11.4194         |  |
| 1.694 |               |         |               |             | -198.83646601 | -11.3253  | -198.83756172 | -198.83898263 | -12.9045      | -199.30457966 | -22.2002      | -293.7458     | -10.8749         |  |
| 1.714 |               |         |               |             | -198.83544889 | -10.6871  | -198.83649030 | -198.83784440 | -12.1902      | -199.30271523 | -21.0303      | -293.2141     | -10.3432         |  |
| 1.754 |               |         |               |             | -198.83346368 | -9.4413   | -198.83440123 | -198.83562583 | -10.7981      | -199.29910407 | -18.7642      | -292.1938     | -9.3229          |  |
| 1.774 |               |         |               |             | -198.83250760 | -8.8414   | -198.83339577 | -198.83455806 | -10.1280      | -199.29737254 | -17.6777      | -291.7072     | -8.8363          |  |
| 1.794 |               |         |               |             | -198.83158196 | -8.2605   | -198.83242252 | -198.83352431 | -9.4793       | -199.29569811 | -16.6269      | -291.2373     | -8.3664          |  |
| 1.814 |               |         |               |             | -198.83069009 | -7.7009   | -198.83148484 | -198.83252807 | -8.8542       | -199.29408499 | -15.6147      | -290.7847     | -7.9138          |  |
| 1.834 |               |         |               |             | -198.82983444 | -7.1639   | -198.83058523 | -198.83157192 | -8.2542       | -199.29253630 | -14.6429      | -290.3499     | -7.4789          |  |
| 1.854 |               |         |               |             | -198.82901675 | -6.6508   | -198.82972542 | -198.83065766 | -7.6805       | -199.29105417 | -13.7128      | -289.9329     | -7.0620          |  |
| 1.874 |               |         |               |             | -198.82823810 | -6.1622   | -198.82890650 | -198.82978642 | -7.1338       | -199.28963987 | -12.8253      | -289.5340     | -6.6631          |  |
| 1.894 |               |         |               |             | -198.82749906 | -5.6985   | -198.82812899 | -198.82895877 | -6.6144       | -199.28829393 | -11.9808      | -289.1532     | -6.2823          |  |
| 1.914 |               |         |               |             | -198.82679969 | -5.2596   | -198.82739296 | -198.82817476 | -6.1225       | -199.28701622 | -11.1790      | -288.7903     | -5.9194          |  |
| 1.934 |               |         |               |             | -198.82613969 | -4.8454   | -198.82669806 | -198.82743405 | -5.6577       | -199.28580608 | -10.4196      | -288.4451     | -5.5742          |  |
| 1.954 |               |         |               |             | -198.82551843 | -4.4556   | -198.82604363 | -198.82673595 | -5.2196       | -199.28466237 | -9.7019       | -288.1172     | -5.2463          |  |
| 1.974 |               |         |               |             | -198.82493502 | -4.0895   | -198.82542872 | -198.82607950 | -4.8077       | -199.28358356 | -9.0249       | -287.8064     | -4.9355          |  |
| 1.994 |               |         |               |             | -198.82438837 | -3.7465   | -198.82485219 | -198.82546351 | -4.4211       | -199.28256781 | -8.3876       | -287.5120     | -4.6411          |  |
| 2.014 |               |         |               |             | -198.82387722 | -3.4257   | -198.82431272 | -198.82488660 | -4.0591       | -199.28161306 | -7.7884       | -287.2336     | -4.3627          |  |
| 2.034 |               |         |               |             | -198.82340017 | -3.1264   | -198.82380886 | -198.82434730 | -3.7207       | -199.28071703 | -7.2262       | -286.9707     | -4.0998          |  |
| 2.054 |               |         |               |             | -198.82295576 | -2.8475   | -198.82333910 | -198.82384400 | -3.4049       | -199.27987732 | -6.6992       | -286.7227     | -3.8518          |  |
| 2.074 |               |         |               |             | -198.82254247 | -2.5882   | -198.82290185 | -198.82337505 | -3.1106       | -199.27909145 | -6.2061       | -286.4889     | -3.6180          |  |
| 2.094 |               |         |               |             | -198.82215874 | -2.3474   | -198.82249548 | -198.82293879 | -2.8368       | -199.27835685 | -5.7451       | -286.2687     | -3.3978          |  |
| 2.114 |               |         |               |             | -198.82180301 | -2.1241   | -198.82211838 | -198.82253350 | -2.5825       | -199.27767098 | -5.3147       | -286.0615     | -3.1906          |  |
| 2.134 |               |         |               |             | -198.82147372 | -1.9175   | -198.82176894 | -198.82215751 | -2.3466       | -199.27703128 | -4.9133       | -285.8667     | -2.9958          |  |
| 2.154 |               |         |               |             | -198.82116935 | -1.7265   | -198.82144557 | -198.82180916 | -2.1280       | -199.27643522 | -4.5393       | -285.6837     | -2.8128          |  |
| 2.174 |               |         |               |             | -198.82088840 | -1.5502   | -198.82114671 | -198.82148682 | -1.9257       | -199.27588034 | -4.1911       | -285.5118     | -2.6409          |  |
| 2.194 |               |         |               |             | -198.82062943 | -1.3877   | -198.82087087 | -198.82118892 | -1.7388       | -199.27536423 | -3.8672       | -285.3505     | -2.4795          |  |
| 2.214 |               |         |               |             | -198.82039103 | -1.2381   | -198.82061659 | -198.82091393 | -1.5662       | -199.27488457 | -3.5663       | -285.1991     | -2.3281          |  |
| 2.234 |               |         |               |             | -198.82017186 | -1.1006   | -198.82038248 | -198.82066040 | -1.4071       | -199.27443912 | -3.2867       | -285.0571     | -2.1862          |  |

|       |               |         |               |               |         |               |         |           |         |
|-------|---------------|---------|---------------|---------------|---------|---------------|---------|-----------|---------|
| 2.254 | -198.81997064 | -0.9743 | -198.82016722 | -198.82042693 | -1.2606 | -199.27402574 | -3.0273 | -284.9239 | -2.0530 |
| 2.274 | -198.81978615 | -0.8585 | -198.81996954 | -198.82021218 | -1.1259 | -199.27364238 | -2.7868 | -284.7991 | -1.9282 |
| 2.294 | -198.81961724 | -0.7525 | -198.81978823 | -198.82001489 | -1.0021 | -199.27328709 | -2.5638 | -284.6822 | -1.8113 |
| 2.314 | -198.81946281 | -0.6556 | -198.81962216 | -198.81983386 | -0.8885 | -199.27295802 | -2.3573 | -284.5726 | -1.7017 |
| 2.334 | -198.81932181 | -0.5672 | -198.81947025 | -198.81966795 | -0.7843 | -199.27265342 | -2.1662 | -284.4699 | -1.5990 |
| 2.354 | -198.81919329 | -0.4865 | -198.81933149 | -198.81951610 | -0.6891 | -199.27237163 | -1.9894 | -284.3738 | -1.5028 |
| 2.374 | -198.81907631 | -0.4131 | -198.81920493 | -198.81937730 | -0.6020 | -199.27211110 | -1.8259 | -284.2837 | -1.4128 |
| 2.394 | -198.81897003 | -0.3464 | -198.81908967 | -198.81925059 | -0.5225 | -199.27187035 | -1.6748 | -284.1993 | -1.3284 |
| 2.444 | -198.81874588 | -0.2058 | -198.81884554 | -198.81898105 | -0.3533 | -199.27134615 | -1.3459 | -284.0110 | -1.1401 |
| 2.494 | -198.81857232 | -0.0968 | -198.81865514 | -198.81876922 | -0.2204 | -199.27091780 | -1.0771 | -283.8511 | -0.9802 |
| 2.544 | -198.81843980 | -0.0137 | -198.81850848 | -198.81860453 | -0.1170 | -199.27056885 | -0.8581 | -283.7153 | -0.8444 |
| 2.594 | -198.81834031 | 0.0487  | -198.81839717 | -198.81847806 | -0.0377 | -199.27028538 | -0.6802 | -283.5999 | -0.7290 |
| 2.644 | -198.81826718 | 0.0946  | -198.81831418 | -198.81838233 | 0.0224  | -199.27005570 | -0.5361 | -283.5016 | -0.6307 |
| 2.694 | -198.81821486 | 0.1275  | -198.81825368 | -198.81831113 | 0.0671  | -199.26987004 | -0.4196 | -283.4180 | -0.5471 |
| 2.744 | -198.81817881 | 0.1501  | -198.81821085 | -198.81825934 | 0.0996  | -199.26972028 | -0.3256 | -283.3466 | -0.4757 |
| 2.794 | -198.81815536 | 0.1648  | -198.81818180 | -198.81822275 | 0.1225  | -199.26959970 | -0.2499 | -283.2857 | -0.4147 |
| 2.844 | -198.81814154 | 0.1735  | -198.81816336 | -198.81819799 | 0.1381  | -199.26950280 | -0.1891 | -283.2335 | -0.3626 |
| 2.894 | -198.81813500 | 0.1776  | -198.81815300 | -198.81818234 | 0.1479  | -199.26942506 | -0.1404 | -283.1888 | -0.3179 |
| 2.944 | -198.81813389 | 0.1783  | -198.81814875 | -198.81817364 | 0.1533  | -199.26936284 | -0.1013 | -283.1505 | -0.2796 |
| 2.994 | -198.81813677 | 0.1765  | -198.81814905 | -198.81817021 | 0.1555  | -199.26931317 | -0.0701 | -283.1175 | -0.2466 |
| 3.044 | -198.81814255 | 0.1728  | -198.81815270 | -198.81817073 | 0.1552  | -199.26927367 | -0.0454 | -283.0891 | -0.2182 |
| 3.094 | -198.81815040 | 0.1679  | -198.81815880 | -198.81817419 | 0.1530  | -199.26924241 | -0.0257 | -283.0646 | -0.1937 |
| 3.144 | -198.81815968 | 0.1621  | -198.81816663 | -198.81817981 | 0.1495  | -199.26921784 | -0.0103 | -283.0433 | -0.1724 |
| 3.194 | -198.81816990 | 0.1557  | -198.81817568 | -198.81818700 | 0.1450  | -199.26919872 | 0.0017  | -283.0249 | -0.1540 |
| 3.244 | -198.81818074 | 0.1489  | -198.81818553 | -198.81819528 | 0.1398  | -199.26918401 | 0.0109  | -283.0089 | -0.1380 |
| 3.294 | -198.81819189 | 0.1419  | -198.81819588 | -198.81820431 | 0.1341  | -199.26917289 | 0.0179  | -282.9949 | -0.1240 |
| 3.344 | -198.81820318 | 0.1348  | -198.81820650 | -198.81821381 | 0.1281  | -199.26916469 | 0.0230  | -282.9827 | -0.1118 |
| 3.394 | -198.81821442 | 0.1277  | -198.81821720 | -198.81822355 | 0.1220  | -199.26915883 | 0.0267  | -282.9719 | -0.1010 |
| 3.444 | -198.81822551 | 0.1208  | -198.81822782 | -198.81823337 | 0.1159  | -199.26915486 | 0.0292  | -282.9625 | -0.0916 |
| 3.494 | -198.81823632 | 0.1140  | -198.81823827 | -198.81824314 | 0.1097  | -199.26915238 | 0.0308  | -282.9542 | -0.0832 |
| 3.544 | -198.81824682 | 0.1074  | -198.81824845 | -198.81825273 | 0.1037  | -199.26915107 | 0.0316  | -282.9467 | -0.0758 |
| 3.594 | -198.81825691 | 0.1011  | -198.81825828 | -198.81826206 | 0.0979  | -199.26915068 | 0.0318  | -282.9402 | -0.0693 |
| 3.644 | -198.81826657 | 0.0950  | -198.81826772 | -198.81827108 | 0.0922  | -199.26915098 | 0.0316  | -282.9343 | -0.0634 |
| 3.694 | -198.81827575 | 0.0893  | -198.81827673 | -198.81827972 | 0.0868  | -199.26915178 | 0.0311  | -282.9290 | -0.0581 |
| 3.744 | -198.81828445 | 0.0838  | -198.81828528 | -198.81828795 | 0.0816  | -199.26915295 | 0.0304  | -282.9243 | -0.0534 |
| 3.794 | -198.81829265 | 0.0787  | -198.81829335 | -198.81829575 | 0.0767  | -199.26915437 | 0.0295  | -282.9201 | -0.0491 |
| 3.844 | -198.81830036 | 0.0738  | -198.81830095 | -198.81830310 | 0.0721  | -199.26915595 | 0.0285  | -282.9162 | -0.0453 |
| 3.894 | -198.81830757 | 0.0693  | -198.81830808 | -198.81831002 | 0.0678  | -199.26915761 | 0.0275  | -282.9127 | -0.0418 |
| 3.944 | -198.81831431 | 0.0651  | -198.81831474 | -198.81831650 | 0.0637  | -199.26915931 | 0.0264  | -282.9096 | -0.0387 |
| 3.994 | -198.81832058 | 0.0611  | -198.81832095 | -198.81832255 | 0.0599  | -199.26916101 | 0.0253  | -282.9067 | -0.0358 |
| 4.044 | -198.81832642 | 0.0575  | -198.81832674 | -198.81832820 | 0.0561  | -199.26916267 | 0.0243  | -282.9041 | -0.0332 |
| 4.094 | -198.81833185 | 0.0541  | -198.81833213 | -198.81833345 | 0.0531  | -199.26916429 | 0.0233  | -282.9017 | -0.0308 |
| 4.144 | -198.81833689 | 0.0509  | -198.81833713 | -198.81833835 | 0.0500  | -199.26916585 | 0.0223  | -282.8995 | -0.0286 |
| 4.194 | -198.81834157 | 0.0480  | -198.81834178 | -198.81834290 | 0.0471  | -199.26916734 | 0.0214  | -282.8975 | -0.0266 |
| 4.244 | -198.81834592 | 0.0452  | -198.81834610 | -198.81834713 | 0.0445  | -199.26916876 | 0.0205  | -282.8957 | -0.0247 |
| 4.294 | -198.81834996 | 0.0427  | -198.81835012 | -198.81835102 | 0.0420  | -199.26917012 | 0.0196  | -282.8940 | -0.0231 |
| 4.344 | -198.81835372 | 0.0403  | -198.81835386 | -198.81835474 | 0.0397  | -199.26917141 | 0.0188  | -282.8924 | -0.0215 |
| 4.394 | -198.81835722 | 0.0381  | -198.81835734 | -198.81835815 | 0.0376  | -199.26917264 | 0.0180  | -282.8910 | -0.0201 |
| 4.444 | -198.81836048 | 0.0361  | -198.81836059 | -198.81836134 | 0.0356  | -199.26917381 | 0.0173  | -282.8897 | -0.0188 |
| 4.494 | -198.81836352 | 0.0342  | -198.81836361 | -198.81836431 | 0.0337  | -199.26917493 | 0.0166  | -282.8885 | -0.0176 |
| 4.544 | -198.81836636 | 0.0324  | -198.81836644 | -198.81836709 | 0.0320  | -199.26917599 | 0.0159  | -282.8874 | -0.0165 |
| 4.594 | -198.81836901 | 0.0307  | -198.81836909 | -198.81836969 | 0.0303  | -199.26917701 | 0.0153  | -282.8863 | -0.0154 |
| 4.644 | -198.81837150 | 0.0292  | -198.81837156 | -198.81837213 | 0.0288  | -199.26917798 | 0.0147  | -282.8854 | -0.0145 |
| 4.694 | -198.81837383 | 0.0277  | -198.81837388 | -198.81837441 | 0.0274  | -199.26917891 | 0.0141  | -282.8845 | -0.0136 |
| 4.744 | -198.81837601 | 0.0263  | -198.81837606 | -198.81837656 | 0.0260  | -199.26917979 | 0.0136  | -282.8837 | -0.0128 |
| 4.794 | -198.81837806 | 0.0251  | -198.81837811 | -198.81837857 | 0.0247  | -199.26918065 | 0.0130  | -282.8830 | -0.0120 |
| 4.844 | -198.81837998 | 0.0239  | -198.81838003 | -198.81838046 | 0.0236  | -199.26918146 | 0.0125  | -282.8823 | -0.0113 |
| 4.894 | -198.81838179 | 0.0227  | -198.81838183 | -198.81838224 | 0.0224  | -199.26918225 | 0.0120  | -282.8816 | -0.0107 |
| 4.944 | -198.81838510 | 0.0206  | -198.81838513 | -198.81838549 | 0.0204  | -199.26918372 | 0.0111  | -282.8805 | -0.0096 |
| 5.094 | -198.81838804 | 0.0188  | -198.81838807 | -198.81838839 | 0.0186  | -199.26918508 | 0.0102  | -282.8795 | -0.0086 |
| 5.194 | -198.81839066 | 0.0171  | -198.81839068 | -198.81839096 | 0.0170  | -199.26918635 | 0.0094  | -282.8786 | -0.0077 |
| 5.294 | -198.81839300 | 0.0157  | -198.81839302 | -198.81839327 | 0.0155  | -199.26918753 | 0.0087  | -282.8779 | -0.0070 |
| 5.394 | -198.81839509 | 0.0144  | -198.81839511 | -198.81839534 | 0.0142  | -199.26918863 | 0.0080  | -282.8773 | -0.0064 |
| 5.494 | -198.81839698 | 0.0132  | -198.81839699 | -198.81839720 | 0.0131  | -199.26918967 | 0.0074  | -282.8767 | -0.0058 |
| 5.594 | -198.81839868 | 0.0121  | -198.81839869 | -198.81839887 | 0.0120  | -199.26919064 | 0.0067  | -282.8763 | -0.0054 |
| 5.694 | -198.81840022 | 0.0112  | -198.81840023 | -198.81840039 | 0.0111  | -199.26919157 | 0.0062  | -282.8759 | -0.0050 |
| 5.794 | -198.81840162 | 0.0103  | -198.81840163 | -198.81840177 | 0.0102  | -199.26919245 | 0.0056  | -282.8756 | -0.0047 |
| 5.894 | -198.81840289 | 0.0095  | -198.81840290 | -198.81840303 | 0.0094  | -199.26919328 | 0.0051  | -282.8753 | -0.0044 |
| 5.994 | -198.81840404 | 0.0088  | -198.81840406 | -198.81840417 | 0.0087  | -199.26919408 | 0.0046  | -282.8751 | -0.0042 |
| 6.094 | -198.81840510 | 0.0081  | -198.81840511 | -198.81840522 | 0.0080  | -199.26919484 | 0.0041  | -282.8749 | -0.0040 |
| 6.194 | -198.81840607 | 0.0075  | -198.81840608 | -198.81840618 | 0.0074  | -199.26919556 | 0.0037  | -282.8747 | -0.0038 |
| 6.294 | -198.81840696 | 0.0069  | -198.81840697 | -198.81840705 | 0.0069  | -199.26919625 | 0.0032  | -282.8746 | -0.0037 |
| 6.394 | -198.81840778 | 0.0064  | -198.81840778 | -198.81840786 | 0.0064  | -199.26919691 | 0.0028  | -282.8745 | -0.0036 |
| 6.494 | -198.81840852 | 0.0059  | -198.81840852 | -198.81840860 | 0.0059  | -199.26919754 | 0.0024  | -282.8744 | -0.0035 |

|        |  |               |        |               |               |        |               |         |           |         |
|--------|--|---------------|--------|---------------|---------------|--------|---------------|---------|-----------|---------|
| 6.594  |  | -198.81840920 | 0.0055 | -198.81840921 | -198.81840927 | 0.0055 | -199.26919813 | 0.0020  | -282.8744 | -0.0035 |
| 6.694  |  | -198.81840983 | 0.0051 | -198.81840983 | -198.81840989 | 0.0051 | -199.26919870 | 0.0017  | -282.8743 | -0.0034 |
| 6.794  |  | -198.81841041 | 0.0048 | -198.81841041 | -198.81841047 | 0.0047 | -199.26919924 | 0.0013  | -282.8743 | -0.0034 |
| 6.894  |  | -198.81841094 | 0.0044 | -198.81841094 | -198.81841099 | 0.0044 | -199.26919976 | 0.0010  | -282.8743 | -0.0034 |
| 6.994  |  | -198.81841143 | 0.0041 | -198.81841143 | -198.81841148 | 0.0041 | -199.26920025 | 0.0007  | -282.8743 | -0.0034 |
| 7.094  |  | -198.81841188 | 0.0038 | -198.81841188 | -198.81841192 | 0.0038 | -199.26920071 | 0.0004  | -282.8743 | -0.0034 |
| 7.194  |  | -198.81841229 | 0.0036 | -198.81841229 | -198.81841233 | 0.0036 | -199.26920116 | 0.0001  | -282.8743 | -0.0034 |
| 7.294  |  | -198.81841267 | 0.0033 | -198.81841267 | -198.81841271 | 0.0033 | -199.26920158 | -0.0001 | -282.8744 | -0.0035 |
| 7.394  |  | -198.81841302 | 0.0031 | -198.81841302 | -198.81841306 | 0.0031 | -199.26920198 | -0.0004 | -282.8744 | -0.0035 |
| 7.494  |  | -198.81841335 | 0.0029 | -198.81841335 | -198.81841338 | 0.0029 | -199.26920237 | -0.0006 | -282.8744 | -0.0035 |
| 7.594  |  | -198.81841365 | 0.0027 | -198.81841365 | -198.81841368 | 0.0027 | -199.26920273 | -0.0008 | -282.8745 | -0.0036 |
| 7.694  |  | -198.81841393 | 0.0025 | -198.81841393 | -198.81841395 | 0.0025 | -199.26920308 | -0.0011 | -282.8745 | -0.0036 |
| 7.794  |  | -198.81841418 | 0.0024 | -198.81841418 | -198.81841421 | 0.0024 | -199.26920341 | -0.0013 | -282.8746 | -0.0037 |
| 7.894  |  | -198.81841442 | 0.0022 | -198.81841442 | -198.81841444 | 0.0022 | -199.26920373 | -0.0015 | -282.8746 | -0.0037 |
| 7.994  |  | -198.81841464 | 0.0021 | -198.81841464 | -198.81841466 | 0.0021 | -199.26920404 | -0.0017 | -282.8747 | -0.0038 |
| 8.094  |  | -198.81841483 | 0.0020 | -198.81841485 | -198.81841487 | 0.0020 | -199.26920433 | -0.0018 | -282.8747 | -0.0038 |
| 8.194  |  | -198.81841502 | 0.0019 | -198.81841504 | -198.81841506 | 0.0019 | -199.26920460 | -0.0020 | -282.8748 | -0.0039 |
| 8.294  |  | -198.81841520 | 0.0018 | -198.81841521 | -198.81841523 | 0.0017 | -199.26920487 | -0.0022 | -282.8748 | -0.0039 |
| 8.394  |  | -198.81841536 | 0.0017 | -198.81841538 | -198.81841539 | 0.0016 | -199.26920512 | -0.0023 | -282.8749 | -0.0040 |
| 8.494  |  | -198.81841551 | 0.0016 | -198.81841553 | -198.81841555 | 0.0015 | -199.26920537 | -0.0025 | -282.8750 | -0.0041 |
| 8.594  |  | -198.81841566 | 0.0015 | -198.81841567 | -198.81841569 | 0.0015 | -199.26920560 | -0.0026 | -282.8750 | -0.0041 |
| 8.694  |  | -198.81841579 | 0.0014 | -198.81841581 | -198.81841582 | 0.0014 | -199.26920582 | -0.0028 | -282.8751 | -0.0042 |
| 8.794  |  | -198.81841591 | 0.0013 | -198.81841593 | -198.81841594 | 0.0013 | -199.26920604 | -0.0029 | -282.8751 | -0.0042 |
| 8.894  |  | -198.81841603 | 0.0012 | -198.81841605 | -198.81841606 | 0.0012 | -199.26920625 | -0.0030 | -282.8752 | -0.0043 |
| 8.994  |  | -198.81841614 | 0.0012 | -198.81841615 | -198.81841617 | 0.0012 | -199.26920644 | -0.0032 | -282.8752 | -0.0043 |
| 9.094  |  | -198.81841624 | 0.0011 | -198.81841626 | -198.81841627 | 0.0011 | -199.26919989 | 0.0009  | -282.8711 | -0.0002 |
| 9.194  |  | -198.81841633 | 0.0010 | -198.81841635 | -198.81841636 | 0.0010 | -199.26919997 | 0.0009  | -282.8711 | -0.0002 |
| 9.294  |  | -198.81841642 | 0.0010 | -198.81841644 | -198.81841645 | 0.0010 | -199.26920004 | 0.0008  | -282.8710 | -0.0001 |
| 9.394  |  | -198.81841651 | 0.0009 | -198.81841652 | -198.81841653 | 0.0009 | -199.26920011 | 0.0008  | -282.8710 | -0.0001 |
| 9.494  |  | -198.81841658 | 0.0009 | -198.81841660 | -198.81841661 | 0.0009 | -199.26920018 | 0.0008  | -282.8710 | -0.0001 |
| 9.594  |  | -198.81841666 | 0.0008 | -198.81841667 | -198.81841668 | 0.0008 | -199.26920024 | 0.0007  | -282.8710 | -0.0001 |
| 9.694  |  | -198.81841673 | 0.0008 | -198.81841674 | -198.81841675 | 0.0008 | -199.26920029 | 0.0007  | -282.8710 | -0.0001 |
| 9.794  |  | -198.81841679 | 0.0008 | -198.81841681 | -198.81841681 | 0.0008 | -199.26920035 | 0.0007  | -282.8710 | -0.0001 |
| 9.894  |  | -198.81841685 | 0.0007 | -198.81841687 | -198.81841688 | 0.0007 | -199.26920040 | 0.0006  | -282.8710 | -0.0001 |
| 20.000 |  | -198.81841799 | 0.0000 | -198.81841801 | -198.81841801 | 0.0000 | -199.26920139 | 0.0000  | -282.8709 | 0.0000  |

| Re               |               |                  |
|------------------|---------------|------------------|
| 1.415            |               |                  |
| DCE (Re-shifted) |               |                  |
| AR               | vCASC13-SCGVB | Δ(vCASC13-SCGVB) |
| -0.331           | -306.7586     | -23.8876         |
| -0.321           | -306.7043     | -23.8334         |
| -0.311           | -306.6464     | -23.7755         |
| -0.301           | -306.5844     | -23.7135         |
| -0.291           | -306.5178     | -23.6469         |
| -0.281           | -306.4461     | -23.5752         |
| -0.271           | -306.3689     | -23.4980         |
| -0.261           | -306.2859     | -23.4150         |
| -0.251           | -306.1967     | -23.3258         |
| -0.241           | -306.1010     | -23.2301         |
| -0.231           | -305.9985     | -23.1276         |
| -0.221           | -305.8891     | -23.0182         |
| -0.211           | -305.7725     | -22.9016         |
| -0.201           | -305.6486     | -22.7777         |
| -0.191           | -305.5173     | -22.6464         |
| -0.181           | -305.3786     | -22.5076         |
| -0.161           | -305.0784     | -22.2074         |
| -0.141           | -304.7480     | -21.8771         |
| -0.121           | -304.3879     | -21.5170         |
| -0.101           | -303.9990     | -21.1281         |
| -0.081           | -303.5823     | -20.7113         |
| -0.061           | -303.1393     | -20.2684         |
| -0.041           | -302.6718     | -19.8009         |
| -0.021           | -302.1819     | -19.3109         |
| -0.001           | -301.6715     | -18.8006         |
| 0.019            | -301.1431     | -18.2722         |
| 0.039            | -300.5991     | -17.7282         |
| 0.059            | -300.0419     | -17.1710         |
| 0.079            | -299.4741     | -16.6032         |
| 0.099            | -298.8983     | -16.0274         |
| 0.119            | -298.3170     | -15.4460         |
| 0.139            | -297.7326     | -14.8617         |
| 0.159            | -297.1476     | -14.2767         |
| 0.179            | -296.5643     | -13.6934         |
| 0.199            | -295.9849     | -13.1140         |
| 0.219            | -295.4115     | -12.5406         |
| 0.239            | -294.8460     | -11.9751         |
| 0.259            | -294.2903     | -11.4194         |
| 0.279            | -293.7458     | -10.8749         |
| 0.299            | -293.2141     | -10.3432         |
| 0.339            | -292.1938     | -9.3229          |
| 0.359            | -291.7072     | -8.8363          |
| 0.379            | -291.2373     | -8.3664          |
| 0.399            | -290.7847     | -7.9138          |
| 0.419            | -290.3499     | -7.4789          |
| 0.439            | -289.9329     | -7.0620          |
| 0.459            | -289.5340     | -6.6631          |
| 0.479            | -289.1532     | -6.2823          |
| 0.499            | -288.7903     | -5.9194          |
| 0.519            | -288.4451     | -5.5742          |
| 0.539            | -288.1172     | -5.2463          |
| 0.559            | -287.8064     | -4.9355          |
| 0.579            | -287.5120     | -4.6411          |
| 0.599            | -287.2336     | -4.3627          |
| 0.619            | -286.9707     | -4.0998          |
| 0.639            | -286.7227     | -3.8518          |
| 0.659            | -286.4889     | -3.6180          |
| 0.679            | -286.2687     | -3.3978          |
| 0.699            | -286.0615     | -3.1906          |
| 0.719            | -285.8667     | -2.9958          |
| 0.739            | -285.6837     | -2.8128          |
| 0.759            | -285.5118     | -2.6409          |
| 0.779            | -285.3505     | -2.4795          |
| 0.799            | -285.1991     | -2.3281          |
| 0.819            | -285.0571     | -2.1862          |



|       |           |         |
|-------|-----------|---------|
| 0.839 | -284.9239 | -2.0530 |
| 0.859 | -284.7991 | -1.9282 |
| 0.879 | -284.6822 | -1.8113 |
| 0.899 | -284.5726 | -1.7017 |
| 0.919 | -284.4699 | -1.5990 |
| 0.939 | -284.3738 | -1.5028 |
| 0.959 | -284.2837 | -1.4128 |
| 0.979 | -284.1993 | -1.3284 |
| 1.029 | -284.0110 | -1.1401 |
| 1.079 | -283.8511 | -0.9802 |
| 1.129 | -283.7153 | -0.8444 |
| 1.179 | -283.5999 | -0.7290 |
| 1.229 | -283.5016 | -0.6307 |
| 1.279 | -283.4180 | -0.5471 |
| 1.329 | -283.3466 | -0.4757 |
| 1.379 | -283.2857 | -0.4147 |
| 1.429 | -283.2335 | -0.3626 |
| 1.479 | -283.1888 | -0.3179 |
| 1.529 | -283.1505 | -0.2796 |
| 1.579 | -283.1175 | -0.2466 |
| 1.629 | -283.0891 | -0.2182 |
| 1.679 | -283.0646 | -0.1937 |
| 1.729 | -283.0433 | -0.1724 |
| 1.779 | -283.0249 | -0.1540 |
| 1.829 | -283.0089 | -0.1380 |
| 1.879 | -282.9949 | -0.1240 |
| 1.929 | -282.9827 | -0.1118 |
| 1.979 | -282.9719 | -0.1010 |
| 2.029 | -282.9625 | -0.0916 |
| 2.079 | -282.9542 | -0.0832 |
| 2.129 | -282.9467 | -0.0758 |
| 2.179 | -282.9402 | -0.0693 |
| 2.229 | -282.9343 | -0.0634 |
| 2.279 | -282.9290 | -0.0581 |
| 2.329 | -282.9243 | -0.0534 |
| 2.379 | -282.9201 | -0.0491 |
| 2.429 | -282.9162 | -0.0453 |
| 2.479 | -282.9127 | -0.0418 |
| 2.529 | -282.9096 | -0.0387 |
| 2.579 | -282.9067 | -0.0358 |
| 2.629 | -282.9041 | -0.0332 |
| 2.679 | -282.9017 | -0.0308 |
| 2.729 | -282.8995 | -0.0286 |
| 2.779 | -282.8975 | -0.0266 |
| 2.829 | -282.8957 | -0.0247 |
| 2.879 | -282.8940 | -0.0231 |
| 2.929 | -282.8924 | -0.0215 |
| 2.979 | -282.8910 | -0.0201 |
| 3.029 | -282.8897 | -0.0188 |
| 3.079 | -282.8885 | -0.0176 |
| 3.129 | -282.8874 | -0.0165 |
| 3.179 | -282.8863 | -0.0154 |
| 3.229 | -282.8854 | -0.0145 |
| 3.279 | -282.8845 | -0.0136 |
| 3.329 | -282.8837 | -0.0128 |
| 3.379 | -282.8830 | -0.0120 |
| 3.429 | -282.8823 | -0.0113 |
| 3.479 | -282.8816 | -0.0107 |
| 3.579 | -282.8805 | -0.0096 |
| 3.679 | -282.8795 | -0.0086 |
| 3.779 | -282.8786 | -0.0077 |
| 3.879 | -282.8779 | -0.0070 |
| 3.979 | -282.8773 | -0.0064 |
| 4.079 | -282.8767 | -0.0058 |
| 4.179 | -282.8763 | -0.0054 |
| 4.279 | -282.8759 | -0.0050 |
| 4.379 | -282.8756 | -0.0047 |
| 4.479 | -282.8753 | -0.0044 |
| 4.579 | -282.8751 | -0.0042 |
| 4.679 | -282.8749 | -0.0040 |
| 4.779 | -282.8747 | -0.0038 |
| 4.879 | -282.8746 | -0.0037 |
| 4.979 | -282.8745 | -0.0036 |
| 5.079 | -282.8744 | -0.0035 |

|        |           |         |
|--------|-----------|---------|
| 5.179  | -282.8744 | -0.0035 |
| 5.279  | -282.8743 | -0.0034 |
| 5.379  | -282.8743 | -0.0034 |
| 5.479  | -282.8743 | -0.0034 |
| 5.579  | -282.8743 | -0.0034 |
| 5.679  | -282.8743 | -0.0034 |
| 5.779  | -282.8743 | -0.0034 |
| 5.879  | -282.8744 | -0.0035 |
| 5.979  | -282.8744 | -0.0035 |
| 6.079  | -282.8744 | -0.0035 |
| 6.179  | -282.8745 | -0.0036 |
| 6.279  | -282.8745 | -0.0036 |
| 6.379  | -282.8746 | -0.0037 |
| 6.479  | -282.8746 | -0.0037 |
| 6.579  | -282.8747 | -0.0038 |
| 6.679  | -282.8747 | -0.0038 |
| 6.779  | -282.8748 | -0.0039 |
| 6.879  | -282.8748 | -0.0039 |
| 6.979  | -282.8749 | -0.0040 |
| 7.079  | -282.8750 | -0.0041 |
| 7.179  | -282.8750 | -0.0041 |
| 7.279  | -282.8751 | -0.0042 |
| 7.379  | -282.8751 | -0.0042 |
| 7.479  | -282.8752 | -0.0043 |
| 7.579  | -282.8752 | -0.0043 |
| 7.679  | -282.8711 | -0.0002 |
| 7.779  | -282.8711 | -0.0002 |
| 7.879  | -282.8710 | -0.0001 |
| 7.979  | -282.8710 | -0.0001 |
| 8.079  | -282.8710 | -0.0001 |
| 8.179  | -282.8710 | -0.0001 |
| 8.279  | -282.8710 | -0.0001 |
| 8.379  | -282.8710 | -0.0001 |
| 8.479  | -282.8710 | -0.0001 |
| 18.585 | -282.8709 | 0.0000  |
